# Supplementary material
Source: publisher figshare collection journal article supplement (https://acs.figshare.com/ndownloader/files/4536154)
Supplement: Supplementary file 1 [file 4536154]

Supporting Information for

**Phosphine-Mediated Olefination between Aldehydes and Allenes: An  
Efficient Synthesis of Trisubstituted 1,3-Dienes with High  
*E*-Selectivity**

Silong Xu, Lili Zhou, San Zeng, Renqin Ma, Zhihong Wang, Zhengjie He\*

*The State Key Laboratory of Elemento-Organic Chemistry and Department of  
Chemistry, Nankai University, 94 Weijin Road, Tianjin 300071, P. R. China*

**Table of Contents**

|                                                        |     |
|--------------------------------------------------------|-----|
| General Remarks .....                                  | S2  |
| Preparation of Allenates <b>2</b> .....                | S2  |
| General Olefination Procedure .....                    | S3  |
| Analytical Data for Dienes <b>3</b> and <b>4</b> ..... | S4  |
| Reference .....                                        | S13 |
| <sup>1</sup> H and <sup>13</sup> C NMR Spectra .....   | S14 |
| NOSEY Spectra of <b>3d</b> and <b>3t</b> .....         | S64 |
| ORTEP Representation of <b>3c</b> and <b>3t</b> .....  | S65 |

## General Remarks

Unless otherwise mentioned, all reactions were carried out in nitrogen atmosphere under anhydrous conditions.  $^1\text{H}$  and  $^{13}\text{C}$  NMR spectra were recorded on a Variant 400 or a Bruker AV 300 spectrometer in  $\text{CDCl}_3$  with tetramethylsilane (TMS) as the internal standard. NOESY spectra were obtained on a Bruker AV 600 spectrometer in  $\text{CDCl}_3$ . Melting points were measured on a RY-I apparatus and uncorrected. High resolution ESI mass spectra were acquired with IonSpec QFT-ESI instrument. CHN microanalyses were measured with a Yanaco CHN Corder MT-3 automatic analyzer. X-ray crystallographic data were collected using a Nonius Kappa CCD diffractometer with Mo  $\text{K}\alpha$  radiation ( $\lambda = 0.7107 \text{ \AA}$ ) at room temperature. Column chromatography was performed on silica gel (200-300 mesh) using a mixture of petroleum ether/ethyl acetate as eluant. Commercially available reagents were used without further purification. PTA was prepared from tetrahydroxymethylphosphonium sulfate according to a reported procedure.<sup>1</sup>

## Preparation of Allenates 2

### Synthesis of ethyl 5-phenylpenta-2, 3-dienoate<sup>2</sup> (**2a**)

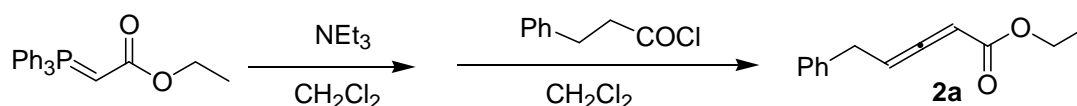

Allenoate **2a** is a known compound and was synthesized according to a similar method developed by Hansen<sup>3</sup> and co-workers. To a solution of (ethoxycarbonylmethylene)triphenylphosphorane (50 mmol, 17.4 g) in dichloromethane (200 mL) was added 1.1 equiv of triethylamine (55 mmol, 5.6 g). After stirred for about 10 minutes, 1.1 equiv of 3-phenylpropanoyl chloride (55 mmol, 9.24 g) was dropwise added over 30 minutes at  $0^\circ\text{C}$ . Then the reaction mixture was allowed to be warmed up to room temperature and stirred overnight. The resulting mixture was carefully evaporated to remove most of the solvent, and the residue was extracted by petroleum ether (bp  $30\text{-}60^\circ\text{C}$ ,  $5 \times 100 \text{ mL}$ ). The combined extracting

was concentrated and the crude product was subjected to column chromatography purification (eluant: 5% EtOAc in petroleum ether) to provide the allenolate **2a** as yellow oil (9.4 g, 93% yield).  $^1\text{H}$  NMR ( $\text{CDCl}_3$ , 400 MHz, TMS):  $\delta$  = 7.36-7.15 (m, 5H), 5.78-5.73 (m, 1H), 5.62-5.59 (m, 1H), 4.24-4.15 (m, 2H), 3.49-3.44 (m, 2H), 1.30 (t,  $J$  = 7.1 Hz, 3H);  $^{13}\text{C}$  NMR ( $\text{CDCl}_3$ , 100 MHz, TMS):  $\delta$  = 212.7, 166.0, 138.5, 128.4, 126.5, 94.7, 88.6, 60.8, 34.0, 14.2.

#### Synthesis of 1-ethyl 6-methyl 2, 3-hexadienedioate (**2b**)

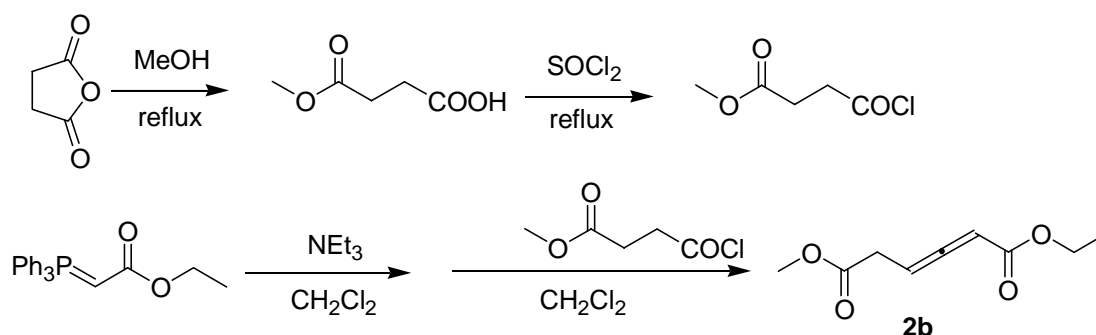

3-Carbomethoxypropionyl chloride was prepared according to a procedure described in literature<sup>4</sup>. Preparation of the allenolate **2b** was followed a similar procedure for **2a** described above.

Allenolate **2b** (colorless oil, 76% yield);  $^1\text{H}$  NMR ( $\text{CDCl}_3$ , 400 MHz, TMS):  $\delta$  = 5.83-5.78 (m, 1H), 5.69-5.67 (m, 1H), 4.20 (q,  $J$  = 7.1 Hz, 2H), 3.73 (s, 3H), 3.23-3.18 (m, 2H), 1.28 (t,  $J$  = 7.1 Hz, 3H);  $^{13}\text{C}$  NMR ( $\text{CDCl}_3$ , 75MHz, TMS):  $\delta$  = 212.3, 170.3, 165.2, 89.0, 88.6, 60.8, 51.9, 32.6, 14.0; HRMS calcd for  $\text{C}_9\text{H}_{12}\text{O}_4\text{Na}^+$  requires 207.0628, found 207.0632.

## General Olefination Procedure

#### **$\text{Ph}_3\text{P}$ -mediated olefination of allenolate **2a** with aldehydes:**

At room temperature and under nitrogen atmosphere, to a stirred solution of aldehyde (0.5 mmol) and  $\text{Ph}_3\text{P}$  (0.6 mmol, 157 mg) in dichloromethane (2 mL) was added allenolate **2a** (0.6 mmol, 121 mg) by the means of a microsyringe over 5 minutes. The resulting reaction mixture was further stirred at room temperature and monitored by TLC. When the aldehyde disappeared, the solvent was removed under reduced pressure and the residue was subjected to column chromatography on silica gel

(gradient eluant: petroleum ether/ethyl acetate 20:1–5:1) to give diene **3**.

#### PTA-mediated olefination of allenolate **2a** or **2b** with aldehydes:

At room temperature and under nitrogen atmosphere, to a stirred solution of aldehyde (0.5 mmol) and PTA (0.6 mmol, 94 mg) in dichloromethane (5 mL) was added allenolate **2a** (0.6 mmol, 121 mg) or **2b** (0.6 mmol, 110 mg) by the means of a microsyringe over 5 minutes. The reaction mixture was further stirred at room temperature and monitored by TLC. When the aldehyde disappeared, water (15 mL) was added to dissolve the PTA oxide. The organic layer was separated and the aqueous layer was extracted with dichloromethane ( $3 \times 10$  mL). The combined extracting was dried over sodium sulfate and concentrated, and the residue was subjected to column chromatography on silica gel (gradient eluant: petroleum ether/ethyl acetate 20:1–5:1) to afford diene **3**.

### Analytical Data for Dienes **3** and **4**

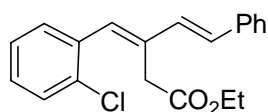

**(3E,4E)-ethyl 3-(2-chlorobenzylidene)-5-phenylpent-4-enoate (3a)** obtained from *o*-chlorobenzaldehyde (70 mg, 0.5 mmol) as a white solid (131 mg, 80% yield): mp 87–88 °C; IR (thin film):  $\nu_{\text{max}}$  3024, 2987, 2897, 1741, 1467, 1448, 1319, 1184, 1151, 1028, 964, 831, 761, 751, 691, 657  $\text{cm}^{-1}$ ;  $^1\text{H}$  NMR ( $\text{CDCl}_3$ , 300 MHz, TMS):  $\delta$  = 7.56 (dd,  $J$  = 7.0, 2.3 Hz, 1H), 7.47–7.19 (m, 8H), 7.02 (d,  $J$  = 16.3 Hz, 1H), 6.93 (s, 1H), 6.69 (d,  $J$  = 16.3 Hz, 1H), 4.21 (q,  $J$  = 7.1 Hz, 2H), 3.47 (s, 2H), 1.28 (t,  $J$  = 7.1 Hz, 3H);  $^{13}\text{C}$  NMR ( $\text{CDCl}_3$ , 75 MHz, TMS):  $\delta$  = 171.4, 137.0, 135.2, 134.1, 134.0, 131.7, 131.6, 130.3, 129.4, 129.3, 128.7, 128.6, 127.7, 126.6, 126.5, 61.0, 34.3, 14.2; Anal. calcd for  $\text{C}_{20}\text{H}_{19}\text{ClO}_2$ : C, 73.50; H, 5.86%; found: C, 73.55; H, 5.95%.

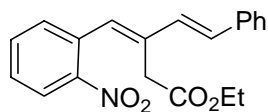

**(3E,4E)-ethyl 3-(2-nitrobenzylidene)-5-phenylpent-4-enoate (3b)** obtained from *o*-nitrobenzaldehyde (76 mg, 0.5 mmol) as a yellow solid (167 mg, 99% yield): mp

81-82 °C; IR (thin film):  $\nu_{\text{max}}$  3022, 2985, 2922, 1721, 1514, 1335, 1239, 1195, 1140, 1025, 963, 870, 741, 685, 548  $\text{cm}^{-1}$ ;  $^1\text{H}$  NMR ( $\text{CDCl}_3$ , 300 MHz, TMS):  $\delta$  = 8.07 (d,  $J$  = 7.7 Hz, 1H), 7.68-7.59 (m, 2H), 7.48-7.22 (m, 6H), 7.13 (s, 1H), 7.00 (d,  $J$  = 16.3 Hz, 1H), 6.70 (d,  $J$  = 16.3 Hz, 1H), 4.18 (q,  $J$  = 7.1 Hz, 2H), 3.37 (s, 2H), 1.26 (t,  $J$  = 7.1 Hz, 3H);  $^{13}\text{C}$  NMR ( $\text{CDCl}_3$ , 75 MHz, TMS):  $\delta$  = 171.1, 148.1, 136.8, 134.1, 133.1, 132.3, 131.6, 131.0, 130.3, 129.9, 128.6, 128.3, 127.8, 126.6, 124.7, 61.0, 34.3, 14.1; Anal calcd for  $\text{C}_{20}\text{H}_{19}\text{NO}_4$ : C, 71.20; H, 5.68; N, 4.15%; found: C, 71.07; H, 5.99; N, 3.99%.

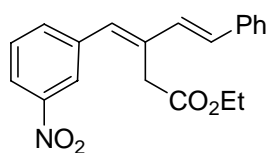

**(3E,4E)-ethyl 3-(3-nitrobenzylidene)-5-phenylpent-4-enoate (3c)** obtained from *m*-nitrobenzaldehyde (76 mg, 0.5 mmol) as a yellow solid (167 mg, 99% yield): mp 68-69 °C; IR (thin film):  $\nu_{\text{max}}$  3072, 2976, 2902, 1726, 1533, 1351, 1305, 1199, 1130, 1068, 966, 810, 731, 696, 607, 549  $\text{cm}^{-1}$ ;  $^1\text{H}$  NMR ( $\text{CDCl}_3$ , 300 MHz, TMS):  $\delta$  = 8.32 (s, 1H), 8.11 (d,  $J$  = 8.2 Hz, 1H), 7.74 (d,  $J$  = 7.7 Hz, 1H), 7.54-7.44 (m, 3H), 7.36-7.23 (m, 3H), 6.96 (d,  $J$  = 16.2 Hz, 1H), 6.86 (s, 1H), 6.78 (d,  $J$  = 16.2 Hz, 1H), 4.26 (q,  $J$  = 7.1 Hz, 2H), 3.53 (s, 2H), 1.32 (t,  $J$  = 7.1 Hz, 3H);  $^{13}\text{C}$  NMR ( $\text{CDCl}_3$ , 75 MHz, TMS):  $\delta$  = 170.8, 148.3, 138.4, 136.7, 135.1, 134.7, 131.7, 131.2, 130.3, 129.2, 128.6, 127.9, 126.6, 123.4, 121.9, 61.3, 34.0, 14.1; Anal calcd for  $\text{C}_{20}\text{H}_{19}\text{NO}_4$ : C, 71.20; H, 5.68; N, 4.15%; found: C, 70.96; H, 5.87; N, 4.12%.

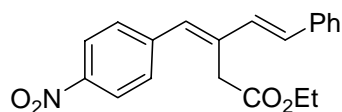

**(3E,4E)-ethyl 3-(4-nitrobenzylidene)-5-phenylpent-4-enoate (3d)** obtained from *p*-nitrobenzaldehyde (76 mg, 0.5 mmol) as a yellow solid (155 mg, 92% yield): mp 98-99 °C; IR (thin film):  $\nu_{\text{max}}$  3021, 2977, 1727, 1591, 1514, 1446, 1334, 1197, 1107, 1030, 963, 889, 840, 741, 686, 634  $\text{cm}^{-1}$ ;  $^1\text{H}$  NMR ( $\text{CDCl}_3$ , 300 MHz, TMS):  $\delta$  = 8.16 (d,  $J$  = 8.6 Hz, 2H), 7.56 (d,  $J$  = 8.6 Hz, 2H), 7.44 (d,  $J$  = 7.4 Hz, 2H), 7.36-7.23 (m, 3H), 6.95 (d,  $J$  = 16.2 Hz, 1H), 6.86 (s, 1H), 6.78 (d,  $J$  = 16.2 Hz, 1H), 4.24 (q,  $J$  = 7.1 Hz, 2H), 3.54 (s, 2H), 1.30 (t,  $J$  = 7.1 Hz, 3H);  $^{13}\text{C}$  NMR ( $\text{CDCl}_3$ , 75 MHz, TMS):  $\delta$  =

170.7, 146.5, 143.4, 136.6, 135.7, 132.1, 131.3, 130.6, 129.4, 128.6, 128.0, 126.6, 123.5, 61.2, 34.0, 14.1; Anal calcd for C<sub>20</sub>H<sub>19</sub>NO<sub>4</sub>: C, 71.20; H, 5.68; N, 4.15%; found: C, 71.21; H, 5.29; N, 4.19%.

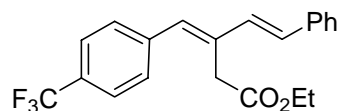

**(3E,4E)-ethyl 3-(4-(trifluoromethyl)benzylidene)-5-phenylpent-4-enoate (3e)**

obtained from *p*-trifluoromethylbenzaldehyde (87 mg, 0.5 mmol) as a white solid (144 mg, 80% yield): mp 49-50 °C; IR (thin film):  $\nu_{\text{max}}$  3027, 2989, 1728, 1608, 1444, 1324, 1252, 1163, 1114, 1066, 1027, 958, 889, 849, 749, 694, 598 cm<sup>-1</sup>; <sup>1</sup>H NMR (CDCl<sub>3</sub>, 300 MHz, TMS):  $\delta$  = 7.61 (d, *J* = 8.2 Hz, 2H), 7.51 (d, *J* = 8.2 Hz, 2H), 7.45 (d, *J* = 7.2 Hz, 2H), 7.36-7.22 (m, 3H), 6.96 (d, *J* = 16.3 Hz, 1H), 6.87 (s, 1H), 6.73 (d, *J* = 16.3 Hz, 1H), 4.23 (q, *J* = 7.1 Hz, 2H), 3.53 (s, 2H), 1.29 (t, *J* = 7.1 Hz, 3H); <sup>13</sup>C NMR (CDCl<sub>3</sub>, 75 MHz, TMS):  $\delta$  = 171.1, 140.5, 137.0, 134.6, 133.1, 131.6, 129.8, 129.0, 128.7, 128.7 (q, *J* = 36.7 Hz, 1C), 127.9, 126.6, 125.3 (q, *J* = 3.8 Hz, 2C), 124.2 (q, *J* = 271.4 Hz, 1C), 61.1, 34.1, 14.2; Anal calcd for C<sub>21</sub>H<sub>19</sub>F<sub>3</sub>O<sub>2</sub>: C, 69.99; H, 5.31%; found: C, 70.13; H, 5.38%.

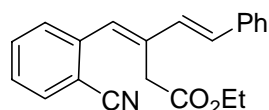

**(3E,4E)-ethyl 3-(2-cyanobenzylidene)-5-phenylpent-4-enoate (3f)**

obtained from *o*-cyanobenzaldehyde (66 mg, 0.5 mmol) as a white solid (157 mg, 99% yield): mp 77-78 °C; IR (thin film):  $\nu_{\text{max}}$  3028, 2981, 2933, 2220, 1723, 1593, 1478, 1446, 1364, 1324, 1195, 1142, 1026, 958, 841, 764, 684, 540 cm<sup>-1</sup>; <sup>1</sup>H NMR (CDCl<sub>3</sub>, 300 MHz, TMS):  $\delta$  = 7.74 (d, *J* = 7.8 Hz, 1H), 7.69 (d, *J* = 7.6 Hz, 1H), 7.61-7.56 (m, 1H), 7.60 (d, *J* = 7.6 Hz, 2H), 7.39-7.23 (m, 4H), 7.02 (d, *J* = 16.3 Hz, 1H), 7.03 (s, 1H), 6.77 (d, *J* = 16.3 Hz, 1H), 4.23 (q, *J* = 7.1 Hz, 2H), 3.51 (s, 2H), 1.29 (t, *J* = 7.1 Hz, 3H); <sup>13</sup>C NMR (CDCl<sub>3</sub>, 75 MHz, TMS):  $\delta$  = 170.9, 140.2, 136.6, 136.3, 132.9, 132.5, 131.1, 130.7, 130.0, 129.3, 128.6, 128.0, 127.6, 126.7, 117.7, 112.4, 61.1, 34.2, 14.1; Anal calcd for C<sub>21</sub>H<sub>19</sub>NO<sub>2</sub>: C, 79.47; H, 6.03; N, 4.41%; found: C, 79.18; H, 6.00; N, 4.44%.

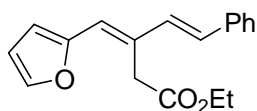

**(3E,4E)-ethyl 3-(furan-2-ylmethylene)-5-phenylpent-4-enoate (3g)** obtained from 2-furylaldehyde (48 mg, 0.5 mmol) as yellow oil (102 mg, 72% yield);  $^1\text{H}$  NMR ( $\text{CDCl}_3$ , 300 MHz, TMS):  $\delta$  = 7.42-7.17 (m, 6H), 6.90 (d,  $J$  = 16.1 Hz, 1H), 6.62 (d,  $J$  = 16.1 Hz, 1H), 6.52 (s, 1H), 6.45-6.39 (m, 2H), 4.17 (q,  $J$  = 7.1 Hz, 2H), 3.82 (s, 2H), 1.22 (t,  $J$  = 7.1 Hz, 3H);  $^{13}\text{C}$  NMR ( $\text{CDCl}_3$ , 75 MHz, TMS):  $\delta$  = 170.9, 152.5, 142.6, 137.1, 131.9, 129.9, 128.5, 128.3, 127.4, 126.3, 121.6, 111.6, 111.5, 60.7, 33.9, 14.1; Anal calcd for  $\text{C}_{18}\text{H}_{18}\text{O}_3$ : C, 76.57; H, 6.43%; found: C, 76.50; H, 6.64%.

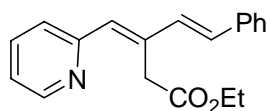

**(3E,4E)-ethyl 5-phenyl-3-(pyridin-2-ylmethylene)pent-4-enoate (3h)** obtained from 2-pyridylaldehyde (54 mg, 0.5 mmol) as colorless oil (103 mg, 70% yield);  $^1\text{H}$  NMR ( $\text{CDCl}_3$ , 300 MHz, TMS):  $\delta$  = 8.55 (d,  $J$  = 4.7 Hz, 1H), 7.55 (dt,  $J$  = 7.7, 1.8 Hz, 1H), 7.44 (d,  $J$  = 7.3 Hz, 2H), 7.33-7.21 (m, 4H), 7.04-7.00 (m, 1H), 6.99 (d,  $J$  = 16.2 Hz, 1H), 6.72 (d,  $J$  = 16.2 Hz, 1H), 6.71 (s, 1H), 4.25 (s, 2H), 4.20 (q,  $J$  = 7.1 Hz, 2H), 1.23 (t,  $J$  = 7.1 Hz, 3H);  $^{13}\text{C}$  NMR ( $\text{CDCl}_3$ , 75 MHz, TMS):  $\delta$  = 171.3, 155.9, 148.9, 136.9, 136.3, 135.9, 132.6, 132.0, 129.7, 128.5, 127.6, 126.5, 125.1, 121.1, 60.4, 33.5, 14.1; Anal calcd for  $\text{C}_{19}\text{H}_{19}\text{NO}_2$ : C, 77.79; H, 6.53; N, 4.77%; found: C, 77.72; H, 6.73; N, 4.71%.

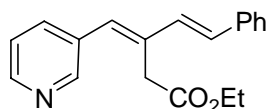

**(3E,4E)-ethyl 5-phenyl-3-(pyridin-3-ylmethylene)pent-4-enoate (3i)** obtained from 3-pyridylaldehyde (54 mg, 0.5 mmol) as colorless oil (111 mg, 76% yield);  $^1\text{H}$  NMR ( $\text{CDCl}_3$ , 300 MHz, TMS):  $\delta$  = 8.54 (s, 1H), 8.38 (d,  $J$  = 4.6 Hz, 1H), 7.64 (d,  $J$  = 7.9 Hz, 1H), 7.33 (d,  $J$  = 7.2 Hz, 2H), 7.23-7.09 (m, 4H), 6.85 (d,  $J$  = 16.2 Hz, 1H), 6.67 (s, 1H), 6.61 (d,  $J$  = 16.2 Hz, 1H), 4.10 (q,  $J$  = 7.1 Hz, 2H), 3.41 (s, 2H), 1.61 (t,  $J$  = 7.1 Hz, 3H);  $^{13}\text{C}$  NMR ( $\text{CDCl}_3$ , 75 MHz, TMS):  $\delta$  = 170.8, 149.7, 148.0, 136.6, 135.4, 134.6, 132.4, 131.3, 130.5, 129.5, 128.4, 127.6, 126.4, 123.0, 60.9, 33.8, 14.0; Anal calcd for  $\text{C}_{19}\text{H}_{19}\text{NO}_2$ : C, 77.79; H, 6.53; N, 4.77%; found: C, 77.68; H, 6.35; N,

4.59%.

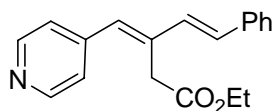

**(3E,4E)-ethyl 5-phenyl-3-(pyridin-4-ylmethylene)pent-4-enoate (3j)** obtained from 4-pyridylaldehyde (54 mg, 0.5 mmol) as colorless oil (111 mg, 76% yield);  $^1\text{H}$  NMR ( $\text{CDCl}_3$ , 300 MHz, TMS):  $\delta$  = 8.48 (d,  $J$  = 5.6 Hz, 2H), 7.34 (d,  $J$  = 7.2 Hz, 2H), 7.25-7.11 (m, 5H), 6.83 (d,  $J$  = 16.1 Hz, 1H), 6.66 (d,  $J$  = 16.1 Hz, 1H), 6.63 (s, 1H), 4.12 (q,  $J$  = 7.1 Hz, 2H), 3.44 (s, 2H), 1.17 (t,  $J$  = 7.1 Hz, 3H);  $^{13}\text{C}$  NMR ( $\text{CDCl}_3$ , 75 MHz, TMS):  $\delta$  = 170.6, 149.7, 144.1, 136.5, 135.8, 131.5, 131.2, 130.4, 128.5, 128.9, 126.5, 123.1, 61.0, 33.9, 14.0; Anal calcd for  $\text{C}_{19}\text{H}_{19}\text{NO}_2$ : C, 77.79; H, 6.53; N, 4.77%; found: C, 77.70; H, 6.60; N, 4.77%.

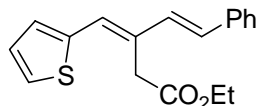

**(3E,4E)-ethyl 5-phenyl-3-(thiophen-2-ylmethylene)pent-4-enoate (3k)** obtained from 2-thiofurylaldehyde (56 mg, 0.5 mmol) as colorless oil (106 mg, 71% yield);  $^1\text{H}$  NMR ( $\text{CDCl}_3$ , 300 MHz, TMS):  $\delta$  = 7.44-7.15 (m, 7H), 7.03 (m, 1H), 6.94 (d,  $J$  = 16.2 Hz, 1H), 6.91 (s, 1H), 6.63 (d,  $J$  = 16.2 Hz, 1H), 4.20 (q,  $J$  = 7.1 Hz, 2H), 3.75 (s, 2H), 1.26 (t,  $J$  = 7.1 Hz, 3H);  $^{13}\text{C}$  NMR ( $\text{CDCl}_3$ , 75 MHz, TMS):  $\delta$  = 170.5, 139.8, 137.2, 132.1, 130.8, 128.5, 128.4, 127.4, 127.3, 127.2, 126.4, 126.3, 126.2, 61.0, 34.2, 14.1; HRMS calcd for  $\text{C}_{18}\text{H}_{18}\text{O}_2\text{SNa}^+$  requires 321.0920, found 321.0927.

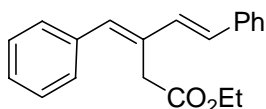

**(3E,4E)-ethyl 3-benzylidene-5-phenylpent-4-enoate (3l)** obtained from benzaldehyde (53 mg, 0.5 mmol) as colorless oil (133 mg, 91% yield);  $^1\text{H}$  NMR ( $\text{CDCl}_3$ , 300 MHz, TMS):  $\delta$  = 7.45-7.20 (m, 10H), 6.96 (d,  $J$  = 16.2 Hz, 1H), 6.88 (s, 1H), 6.65 (d,  $J$  = 16.2 Hz, 1H), 4.22 (q,  $J$  = 7.1 Hz, 2H), 3.57 (s, 2H), 1.28 (t,  $J$  = 7.1 Hz, 3H);  $^{13}\text{C}$  NMR ( $\text{CDCl}_3$ , 75 MHz, TMS):  $\delta$  = 171.5, 137.2, 136.9, 134.9, 132.7, 132.2, 128.8, 128.6, 128.5, 128.3, 127.5, 127.3, 126.4, 60.9, 34.1, 14.2; Anal calcd for  $\text{C}_{20}\text{H}_{20}\text{O}_2$ : C, 82.16; H, 6.89%; found: C, 81.96; H, 6.89%.

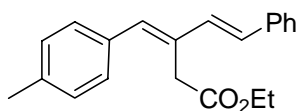

**(3E,4E)-ethyl 3-(4-methylbenzylidene)-5-phenylpent-4-enoate (3m)** obtained from *p*-methylbenzaldehyde (60 mg, 0.5 mmol) as colorless oil (78 mg, 51% yield);  $^1\text{H}$  NMR ( $\text{CDCl}_3$ , 400 MHz, TMS):  $\delta$  = 7.43 (d,  $J$  = 7.7 Hz, 2H), 7.34-7.16 (m, 7H), 6.96 (d,  $J$  = 16.2 Hz, 1H), 6.86 (s, 1H), 6.63 (d,  $J$  = 16.2 Hz, 1H), 4.22 (q,  $J$  = 7.1 Hz, 2H), 3.57 (s, 2H), 2.36 (s, 3H), 1.29 (t,  $J$  = 7.1 Hz, 3H);  $^{13}\text{C}$  NMR ( $\text{CDCl}_3$ , 100 MHz, TMS):  $\delta$  = 171.6, 137.2, 137.1, 135.0, 133.9, 132.3, 132.0, 129.0, 128.7, 128.5, 128.1, 127.4, 126.3, 60.9, 34.0, 21.2, 14.2; HRMS calcd for  $\text{C}_{21}\text{H}_{22}\text{O}_2\text{Na}^+$  requires 329.1512, found 329.1518.

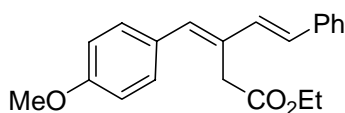

**(3E,4E)-ethyl 3-(4-methoxybenzylidene)-5-phenylpent-4-enoate (3n)** obtained from *p*-methoxybenzaldehyde (68 mg, 0.5 mmol) as a white solid (81 mg, 50% yield): mp. 49-51 °C; IR (thin film):  $\nu_{\text{max}}$  3024, 2956, 2839, 1729, 1601, 1508, 1442, 1299, 1251, 1181, 1142, 1027, 961, 844, 749, 693, 528  $\text{cm}^{-1}$ ;  $^1\text{H}$  NMR ( $\text{CDCl}_3$ , 300 MHz, TMS):  $\delta$  = 7.43 (d,  $J$  = 7.4 Hz, 2H), 7.37-7.18 (m, 5H), 6.95 (d,  $J$  = 16.2 Hz, 1H), 6.90 (d,  $J$  = 8.7 Hz, 2H), 6.82 (s, 1H), 6.62 (d,  $J$  = 16.2 Hz, 1H), 4.22 (q,  $J$  = 7.1 Hz, 2H), 3.80 (s, 3H), 3.57 (s, 2H), 1.28 (t,  $J$  = 7.1 Hz, 3H);  $^{13}\text{C}$  NMR ( $\text{CDCl}_3$ , 100 MHz, TMS):  $\delta$  = 171.6, 158.8, 137.3, 134.7, 132.4, 131.2, 130.1, 129.3, 128.5, 127.7, 127.3, 126.3, 113.8, 60.9, 55.1, 34.0, 14.2; Anal calcd for  $\text{C}_{21}\text{H}_{22}\text{O}_3$ : C, 78.23; H, 6.88%; found: C, 78.34; H, 6.41%.

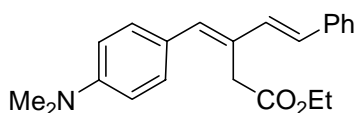

**(3E,4E)-ethyl 3-(4-(dimethylamino)benzylidene)-5-phenylpent-4-enoate (3o)** obtained from *p*-(*N,N*-dimethylamino)benzaldehyde (75 mg, 0.5 mmol) as a yellow solid (72 mg, 43% yield): mp. 73-76 °C;  $^1\text{H}$  NMR ( $\text{CDCl}_3$ , 300 MHz, TMS):  $\delta$  = 7.43 (d,  $J$  = 7.5 Hz, 2H), 7.34-7.17 (m, 5H), 6.97 (d,  $J$  = 16.2 Hz, 1H), 6.79 (s, 1H), 6.71 (d,  $J$  = 8.7 Hz, 2H), 6.57 (d,  $J$  = 16.2 Hz, 1H), 4.23 (q,  $J$  = 7.1 Hz, 2H), 3.62 (s, 2H), 2.97 (s, 6H), 1.29 (t,  $J$  = 7.1 Hz, 3H);  $^{13}\text{C}$  NMR ( $\text{CDCl}_3$ , 75 MHz, TMS):  $\delta$  = 171.9, 149.7,

137.7, 135.5, 133.2, 130.1, 129.5, 128.5, 127.0, 126.7, 126.2, 125.0, 112.0, 60.8, 40.3, 34.2, 14.2; HRMS calcd for  $C_{22}H_{25}NO_2H^+$  requires 336.1958, found 336.1961.

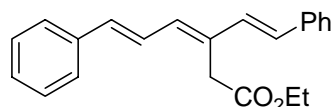

**(3E,5E)-ethyl 6-phenyl-3-((E)-styryl)hexa-3,5-dienoate (3p)** obtained from *trans*-cinnamaldehyde (66 mg, 0.5 mmol) as a yellow solid (48 mg, 30% yield): mp 71-74 °C;  $^1H$  NMR ( $CDCl_3$ , 300 MHz, TMS):  $\delta$  = 7.46-7.21 (m, 10H), 7.16 (dd,  $J$  = 15.4, 11.3 Hz, 1H), 6.90 (d,  $J$  = 16.1 Hz, 1H), 6.69 (d,  $J$  = 15.4 Hz, 1H), 6.67 (d,  $J$  = 16.1 Hz, 1H), 6.54 (d,  $J$  = 11.3 Hz, 1H), 4.17 (q,  $J$  = 7.1 Hz, 2H), 3.58 (s, 2H), 1.24 (t,  $J$  = 7.1 Hz, 3H);  $^{13}C$  NMR ( $CDCl_3$ , 75 MHz, TMS):  $\delta$  = 170.7, 137.4, 137.3, 134.9, 134.5, 132.3, 131.7, 128.6, 128.5, 128.4, 127.8, 127.5, 126.6, 126.5, 124.7, 60.9, 33.4, 14.2; HRMS calcd for  $C_{22}H_{22}O_2Na^+$  requires 341.1512, found 341.1517.

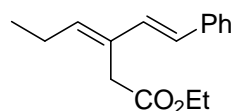

**(E)-ethyl 3-((E)-styryl)hex-3-enoate (3q)** obtained from propylaldehyde (29 mg, 0.5 mmol) as colorless oil (54 mg, 44% yield);  $^1H$  NMR ( $CDCl_3$ , 400 MHz, TMS):  $\delta$  = 7.32-7.10 (m, 5H), 6.71 (d,  $J$  = 16.1 Hz, 1H), 6.42 (d,  $J$  = 16.1 Hz, 1H), 5.75 (t,  $J$  = 7.0 Hz, 1H), 4.05 (q,  $J$  = 7.0 Hz, 2H), 3.29 (s, 2H), 2.19-2.15 (m, 2H), 1.17 (t,  $J$  = 7.0 Hz, 3H), 0.98 (t,  $J$  = 7.3 Hz, 3H);  $^{13}C$  NMR ( $CDCl_3$ , 100 MHz, TMS):  $\delta$  = 171.2, 138.8, 137.5, 132.0, 130.6, 128.5, 127.0, 126.3, 126.2, 60.7, 32.9, 22.0, 14.2, 14.1; HRMS calcd for  $C_{16}H_{20}O_2Na^+$  requires 267.1355, found 267.1358.

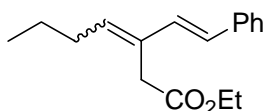

**(E)-ethyl 3-((E)-styryl)hept-3-enoate (3r)** obtained from *n*-butylaldehyde (36 mg, 0.5 mmol) as colorless oil (59 mg, 46% yield), contaminated by the minor product (*Z,E*)-isomer with a ratio of (*E,E*) : (*Z,E*) = 8 : 1;  $^1H$  NMR ( $CDCl_3$ , 400 MHz, TMS):  $\delta$  = 7.39 (d,  $J$  = 7.5 Hz, 2H), 7.31-7.17 (m, 3H), 6.79 (d,  $J$  = 16.3 Hz, 1H), 6.49 (d,  $J$  = 16.3 Hz, 1H), 5.85 (t,  $J$  = 7.4 Hz, 1H), 4.14 (q,  $J$  = 7.1 Hz, 2H), 3.38 (s, 2H), 2.24-2.18 (m, 2H), 1.53-1.43 (m, 2H), 1.24 (t,  $J$  = 7.1 Hz, 3H), 0.96 (t,  $J$  = 7.4 Hz, 3H);  $^{13}C$  NMR ( $CDCl_3$ , 75 MHz, TMS):  $\delta$  = 171.2, 137.6, 137.1, 132.1, 131.3, 128.5, 127.0,

126.4, 126.2, 60.7, 33.0, 30.8, 22.5, 14.2, 13.8; HRMS calcd for  $C_{17}H_{22}O_2 Na^+$  requires 281.1512, found 281.1515.

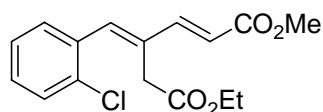

**(2E,4E)-6-ethyl 1-methyl 4-(2-chlorobenzylidene)hex-2-enedioate (3s)** obtained from *o*-chlorobenzaldehyde (70 mg, 0.5 mmol) as a white solid (83 mg, 54% yield): mp 55-57 °C; IR (thin film):  $\nu_{max}$  3060, 2972, 2947, 1730, 1709, 1619, 1464, 1434, 1316, 1251, 1224, 1197, 1003, 858, 764, 687, 459  $cm^{-1}$ ;  $^1H$  NMR ( $CDCl_3$ , 400 MHz, TMS):  $\delta$  = 7.46 (d,  $J$  = 15.9 Hz, 1H), 7.41 (m, 1H), 7.32 (m, 1H), 7.18 (m, 2H), 7.05 (s, 1H), 5.93 (d,  $J$  = 15.9 Hz, 1H), 4.10 (q,  $J$  = 7.1 Hz, 2H), 3.68 (s, 3H), 3.28 (s, 2H), 1.18 (t,  $J$  = 7.1 Hz, 3H);  $^{13}C$  NMR ( $CDCl_3$ , 75 MHz, TMS):  $\delta$  = 170.4, 167.0, 147.1, 138.3, 134.0, 132.3, 130.0, 129.5, 129.4, 126.6, 118.5, 61.0, 51.5, 33.8, 14.0; HRMS calcd for  $C_{16}H_{17}ClO_4Na^+$  requires 331.0708, found 331.0702.

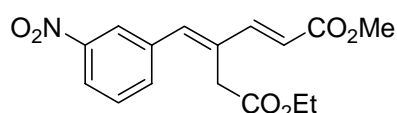

**(2E,4E)-6-ethyl 1-methyl 4-(3-nitrobenzylidene)hex-2-enedioate (3t)** obtained from *m*-nitrobenzaldehyde (76 mg, 0.5 mmol) as a white solid (116 mg, 73% yield): mp 69-70 °C; IR (thin film):  $\nu_{max}$  3064, 2979, 2954, 1714, 1624, 1524, 1463, 1432, 1348, 1319, 1238, 1199, 1132, 1093, 991, 856, 810, 736, 711  $cm^{-1}$ ;  $^1H$  NMR ( $CDCl_3$ , 300 MHz, TMS):  $\delta$  = 8.34 (s, 1H), 8.20 (d,  $J$  = 8.2 Hz, 1H), 7.75 (d,  $J$  = 7.6 Hz, 1H), 7.61-7.56 (m, 1H), 7.50 (d,  $J$  = 15.9 Hz, 1H), 7.09 (s, 1H), 6.12 (d,  $J$  = 15.9 Hz, 1H), 4.25 (q,  $J$  = 7.1 Hz, 2H), 3.80 (s, 3H), 3.44 (s, 2H), 1.32 (t,  $J$  = 7.1 Hz, 3H);  $^{13}C$  NMR ( $CDCl_3$ , 75 MHz, TMS):  $\delta$  = 170.1, 167.0, 148.4, 146.8, 138.3, 137.3, 134.8, 133.5, 129.6, 123.7, 123.0, 119.6, 61.6, 51.7, 33.9, 14.1; Anal calcd for  $C_{16}H_{17}NO_6$ : C, 60.18; H, 5.37; N, 4.39%; found: C, 59.94; H, 5.47; N, 4.25%.

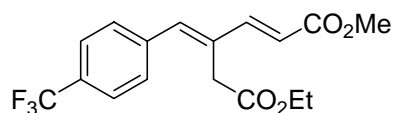

**(2E,4E)-6-ethyl 1-methyl 4-(4-(trifluoromethyl)benzylidene)hex-2-enedioate: 6e (3u)** obtained from *p*-trifluoromethylbenzaldehyde (87 mg, 0.5 mmol) as a white solid (120 mg, 70% yield): mp. 45-47 °C;  $^1H$  NMR ( $CDCl_3$ , 400 MHz, TMS):  $\delta$  = 7.65 (d,  $J$

= 7.9 Hz, 2H), 7.53 (d,  $J$  = 7.9 Hz, 2H), 7.50 (d,  $J$  = 15.8 Hz, 1H), 7.09 (s, 1H), 6.06 (d,  $J$  = 15.8 Hz, 1H), 4.22 (q,  $J$  = 7.1 Hz, 2H), 3.78 (s, 3H), 3.44 (s, 2H), 1.30 (t,  $J$  = 7.1 Hz, 3H);  $^{13}\text{C}$  NMR ( $\text{CDCl}_3$ , 100 MHz, TMS):  $\delta$  = 170.4, 167.1, 147.3, 139.8, 139.2, 132.7, 130.0 (q,  $J$  = 32.9 Hz, 1C), 129.1, 125.4 (q,  $J$  = 3.3 Hz, 2C), 118.8, 61.4, 51.7, 33.7, 14.1; HRMS calcd for  $\text{C}_{17}\text{H}_{17}\text{F}_3\text{O}_4\text{Na}^+$  requires 365.0971, found 365.0966.

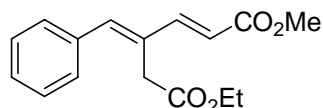

**(2E,4E)-6-ethyl 1-methyl 4-benzylidenehex-2-enedioate (3v)** obtained from benzaldehyde (53 mg, 0.5 mmol) as colorless oil (86 mg, 63% yield);  $^1\text{H}$  NMR ( $\text{CDCl}_3$ , 400 MHz, TMS):  $\delta$  = 7.51 (d,  $J$  = 15.8 Hz, 1H), 7.41-7.30 (m, 5H), 7.07 (s, 1H), 6.00 (d,  $J$  = 15.8 Hz, 1H), 4.21 (q,  $J$  = 7.1 Hz, 2H), 3.76 (s, 3H), 3.47 (s, 2H), 1.28 (t,  $J$  = 7.1 Hz, 3H);  $^{13}\text{C}$  NMR ( $\text{CDCl}_3$ , 75 MHz, TMS):  $\delta$  = 170.5, 167.1, 148.0, 141.6, 135.6, 130.9, 128.8, 128.4, 128.2, 117.6, 61.0, 51.4, 33.6, 14.0; HRMS calcd for  $\text{C}_{16}\text{H}_{17}\text{O}_4\text{Na}^+$  requires 297.1097, found 297.1100.

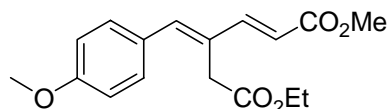

**(2E,4E)-6-ethyl 1-methyl 4-(4-methoxybenzylidene)hex-2-enedioate (3w)** obtained from *p*-methoxybenzaldehyde (68 mg, 0.5 mmol) as colorless oil (50 mg, 33% yield);  $^1\text{H}$  NMR ( $\text{CDCl}_3$ , 400 MHz, TMS):  $\delta$  = 7.50 (d,  $J$  = 15.8 Hz, 1H), 7.37 (d,  $J$  = 8.5 Hz, 2H), 7.01 (s, 1H), 6.92 (d,  $J$  = 8.5 Hz, 2H), 5.96 (d,  $J$  = 15.8 Hz, 1H), 4.22 (q,  $J$  = 7.1 Hz, 2H), 3.83 (s, 3H), 3.77 (s, 3H), 3.49 (s, 2H), 1.29 (t,  $J$  = 7.1 Hz, 3H);  $^{13}\text{C}$  NMR ( $\text{CDCl}_3$ , 100 MHz, TMS):  $\delta$  = 170.9, 167.5, 159.7, 148.6, 141.7, 130.6, 129.2, 128.2, 116.6, 114.0, 61.2, 55.2, 51.6, 33.8, 14.1; HRMS calcd for  $\text{C}_{17}\text{H}_{20}\text{O}_5\text{Na}^+$  requires 327.1203, found 327.1207.

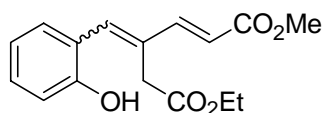

**(2E,4E)-6-ethyl 1-methyl 4-(2-hydroxybenzylidene)hex-2-enedioate (3x)** obtained from salicylaldehyde (61 mg, 0.5 mmol) as colorless oil (103 mg, 71% yield), contaminated by the minor product (*Z,E*)-isomer with a ratio of (*E,E*) : (*Z,E*) = 8 : 1;  $^1\text{H}$  NMR ( $\text{CDCl}_3$ , 400 MHz, TMS):  $\delta$  = 7.56 (d,  $J$  = 15.9 Hz, 1H), 7.44 (br s, 1H),

7.27 (d,  $J = 7.7$  Hz, 1H), 7.19-7.15 (m, 2H), 6.90-6.85 (m, 2H), 5.92 (d,  $J = 15.8$  Hz, 1H), 4.18 (q,  $J = 7.1$  Hz, 2H), 3.76 (s, 3H), 3.42 (s, 2H), 1.25 (t,  $J = 7.1$  Hz, 3H);  $^{13}\text{C}$  NMR ( $\text{CDCl}_3$ , 75 MHz, TMS):  $\delta = 171.5, 168.0, 154.4, 148.4, 138.2, 131.5, 130.0, 129.4, 122.6, 120.0, 116.8, 116.0, 61.3, 51.7, 33.9, 13.9$ ; HRMS calcd for  $\text{C}_{16}\text{H}_{18}\text{O}_5\text{Na}^+$  requires 313.1046, found 313.1038.

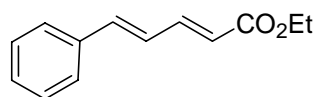

(**2E,4E**)-ethyl 5-phenylpenta-2,4-dienoate<sup>5</sup> (**4**) obtained from allenolate **2a** (101 mg, 0.5 mmol) as slightly yellow oil (79 mg, 78% yield);  $^1\text{H}$  NMR ( $\text{CDCl}_3$ , 400 MHz, TMS) 7.45-7.41 (m, 3H), 7.36-7.29 (m, 3H), 6.91-6.82 (m, 2H), 5.98 (d,  $J = 15.3$  Hz, 1H), 4.22 (q,  $J = 7.1$  Hz, 2H), 1.31 (t,  $J = 7.1$  Hz, 3H);  $^{13}\text{C}$  NMR ( $\text{CDCl}_3$ , 100 MHz, TMS):  $\delta = 166.9, 144.4, 140.3, 136.0, 128.9, 128.7, 127.1, 126.2, 121.3, 60.2, 14.2$ .

## Reference

1. Daigle, D. J. *Inorg. Synth.* **1998**, 32, 40.
2. Suarez, A.; Fu, G. C. *Angew. Chem. Int. Ed.* **2004**, 43, 3580.
3. Hansen, H.-J. *Helv. Chim. Acta.* **1980**, 63, 438.
4. Nenitzescu; Cioranescu; Przemetzky; *Chem. Ber.* **1940**, 73, 313.
5. Dockendorff, C.; Lautens, M. *J. Am. Chem. Soc.* **2005**, 127, 15028.

# $^1\text{H}$ and $^{13}\text{C}$ NMR Spectra

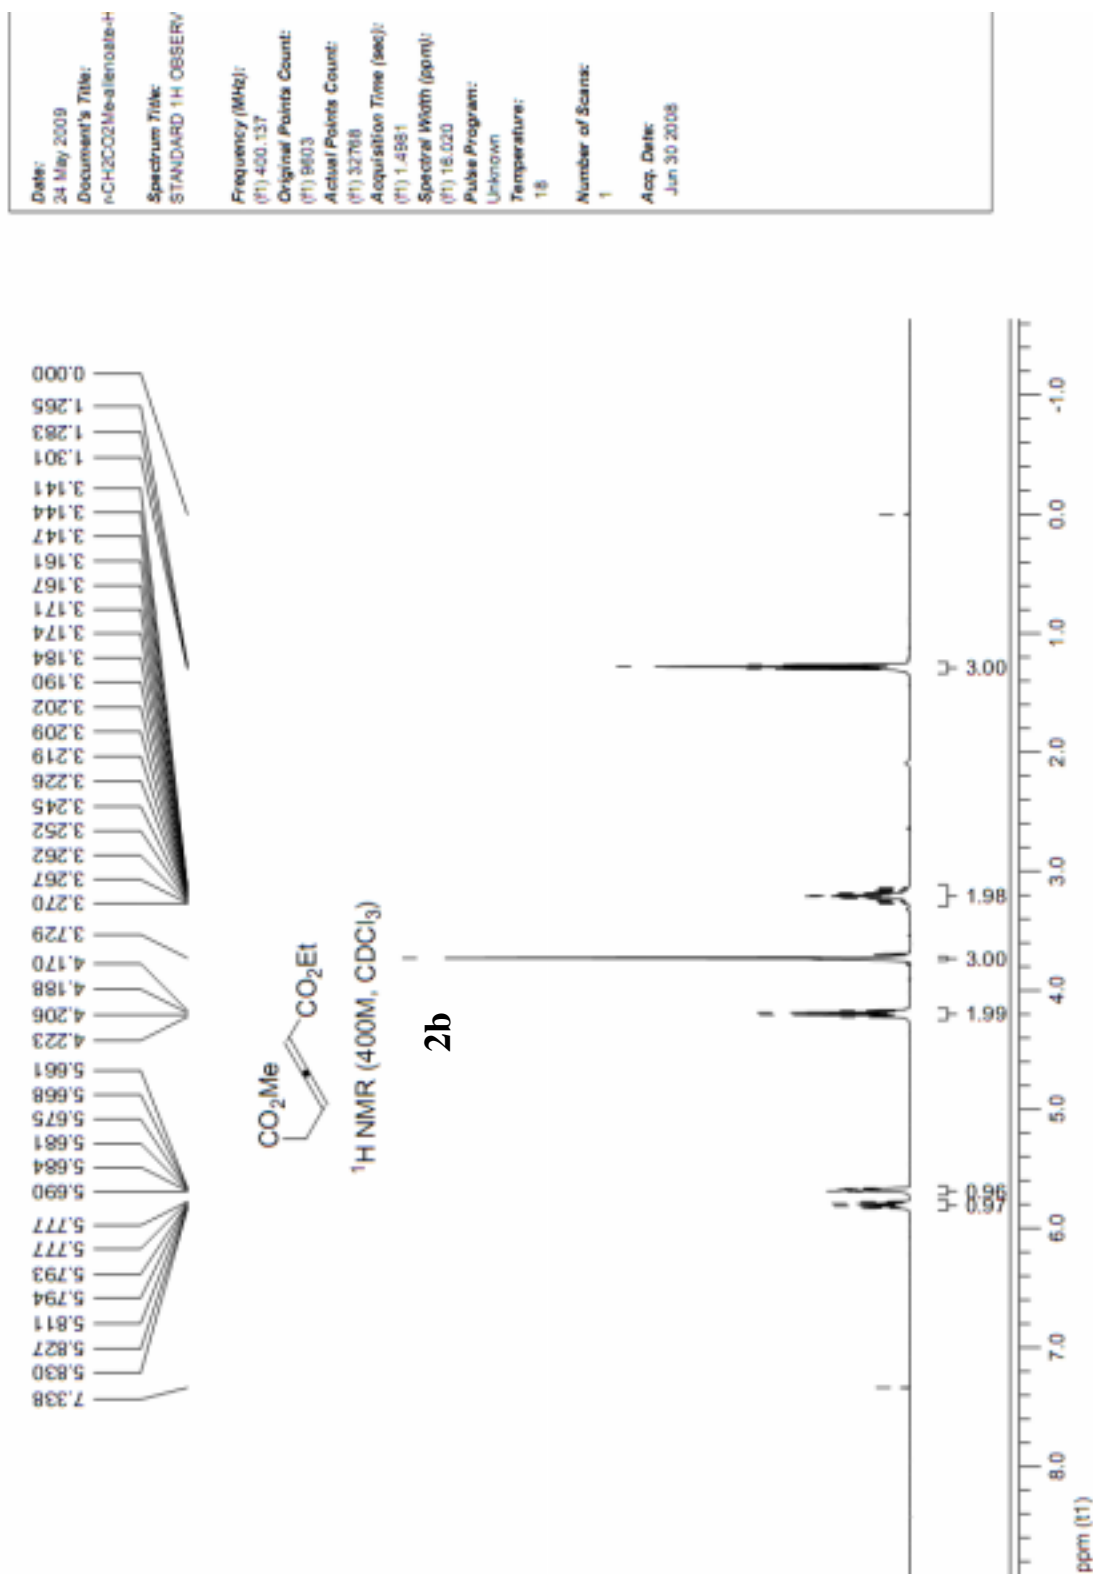

Date: 15 Apr 2009  
 Document's Title: n-CH<sub>3</sub>CO<sub>2</sub>Me-allylate-C  
 Spectrum Title: None  
 Frequency (MHz): (F1) 75.468  
 Original Points Count: (F1) 32768  
 Actual Points Count: (F1) 32768  
 Acquisition Time (sec): (F1) 1.8219  
 Spectral Width (ppm): (F1) 238.322  
 Pulse Program: Unknown

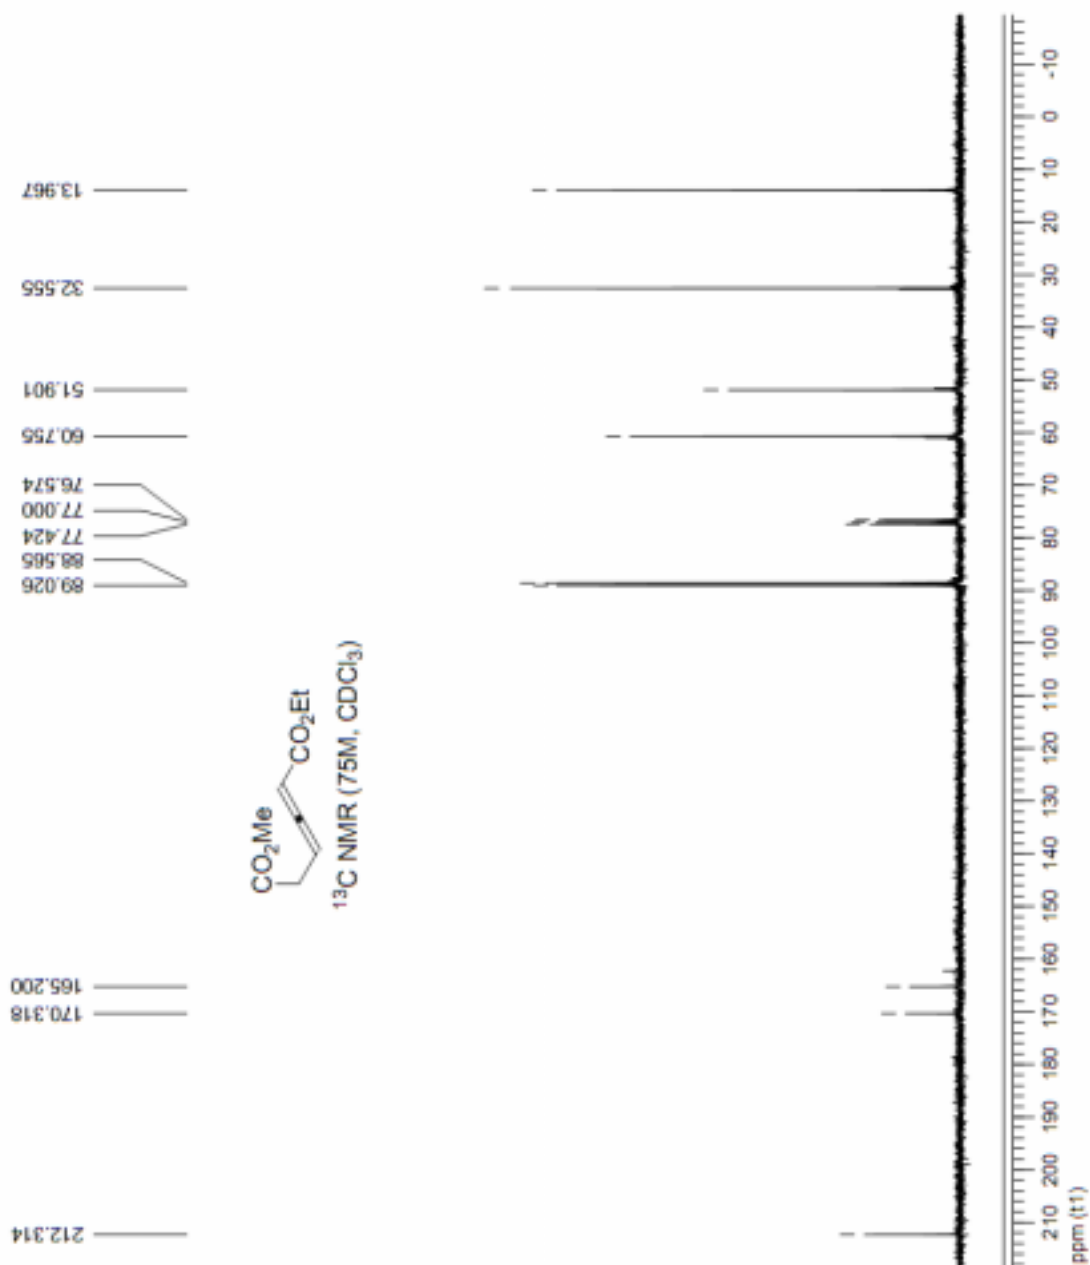



Date: 26 Jun 2009  
 Document's Title: 2-Cl-C.mmc  
 Spectrum Title: None  
 Frequency (MHz): #1 75.468  
 Original Points Count: #1 32768  
 Actual Points Count: #1 32768  
 Acquisition Time (sec): #1 1.8219  
 Spectral Width (ppm): #1 238.322  
 Pulse Program: Unknown

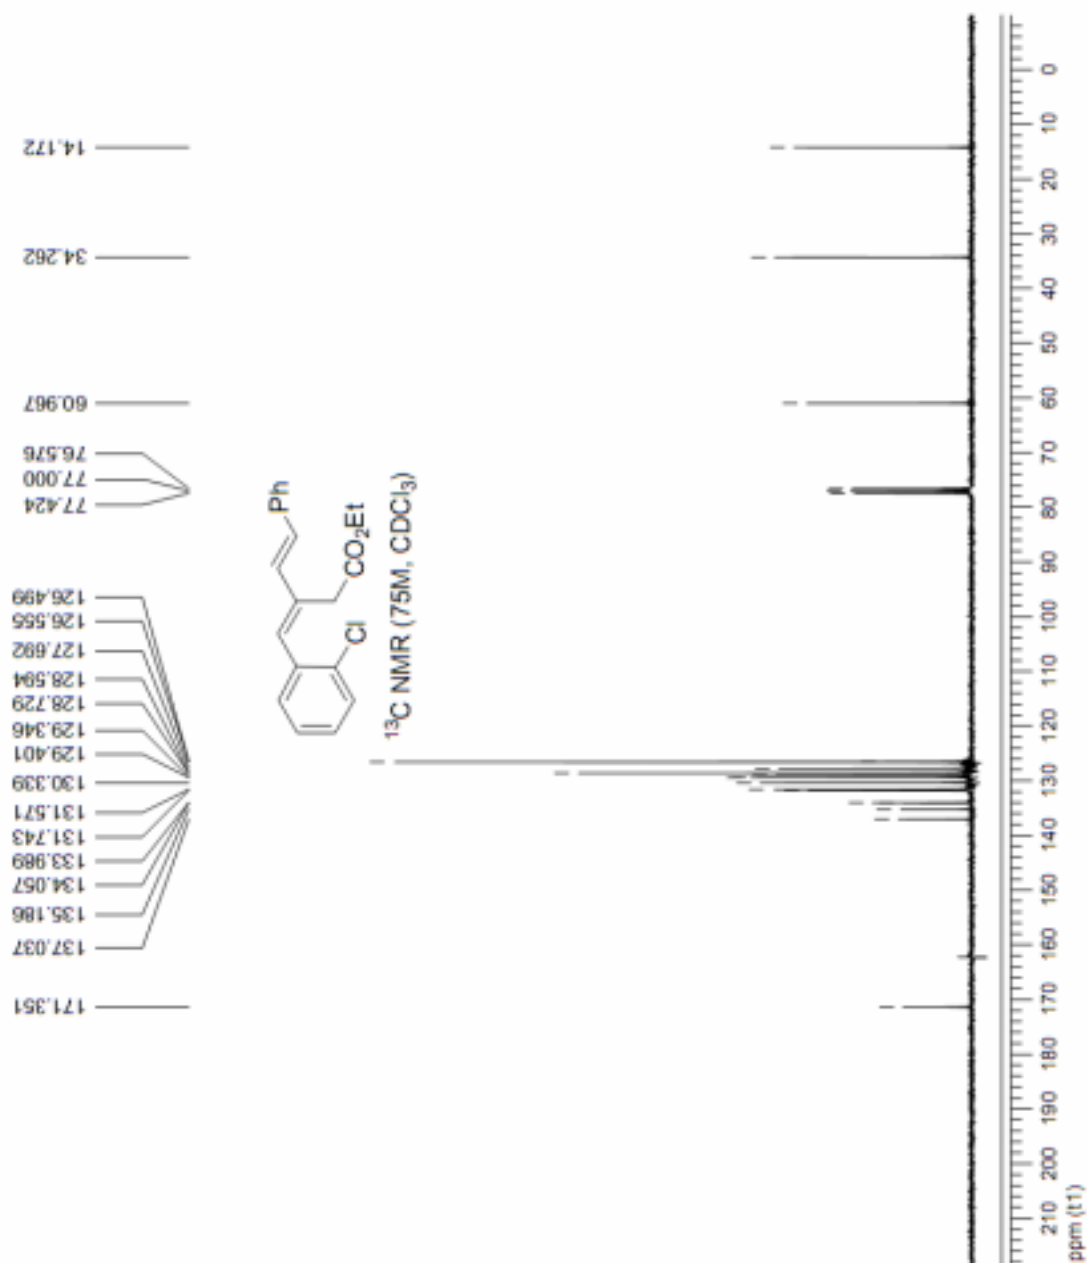

|                         |                        |
|-------------------------|------------------------|
| Date:                   | 14 Apr 2009            |
| Document's Title:       | 1                      |
| Spectrum Title:         | None                   |
| Frequency (MHz):        | (f1) 300.132           |
| Original Points Count:  | (f1) 9258              |
| Actual Points Count:    | (f1) 32768             |
| Acquisition Time (sec): | (f1) 1.4998            |
| Spectral Width (ppm):   | (f1) 20.567            |
| Pulse Program:          | ZG30                   |
| Temperature:            | 295.1                  |
| Number of Scans:        | 8                      |
| Acq. Date:              | Wed Nov 07 12:49:27 AM |

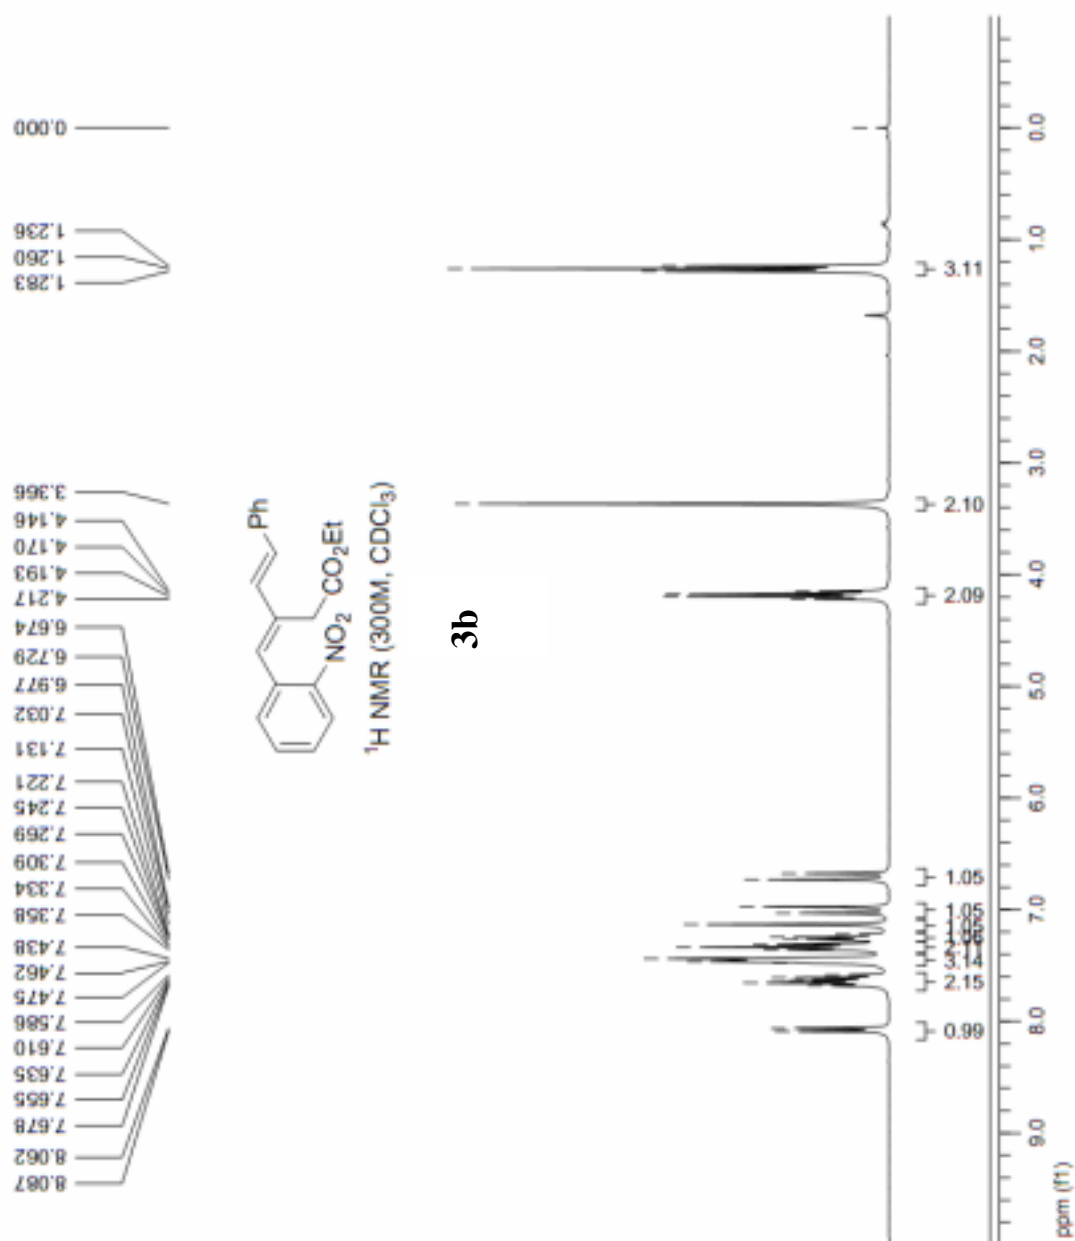

Date: 14 Apr 2009  
 Document's Title: 2-NO2-C.mmc  
 Spectrum Title: None  
 Frequency (MHz): (f1) 75.468  
 Original Points Count: (f1) 32768  
 Actual Points Count: (f1) 32768  
 Acquisition Time (sec): (f1) 1.8219  
 Spectral Width (ppm): (f1) 238.322  
 Pulse Program: Unknown

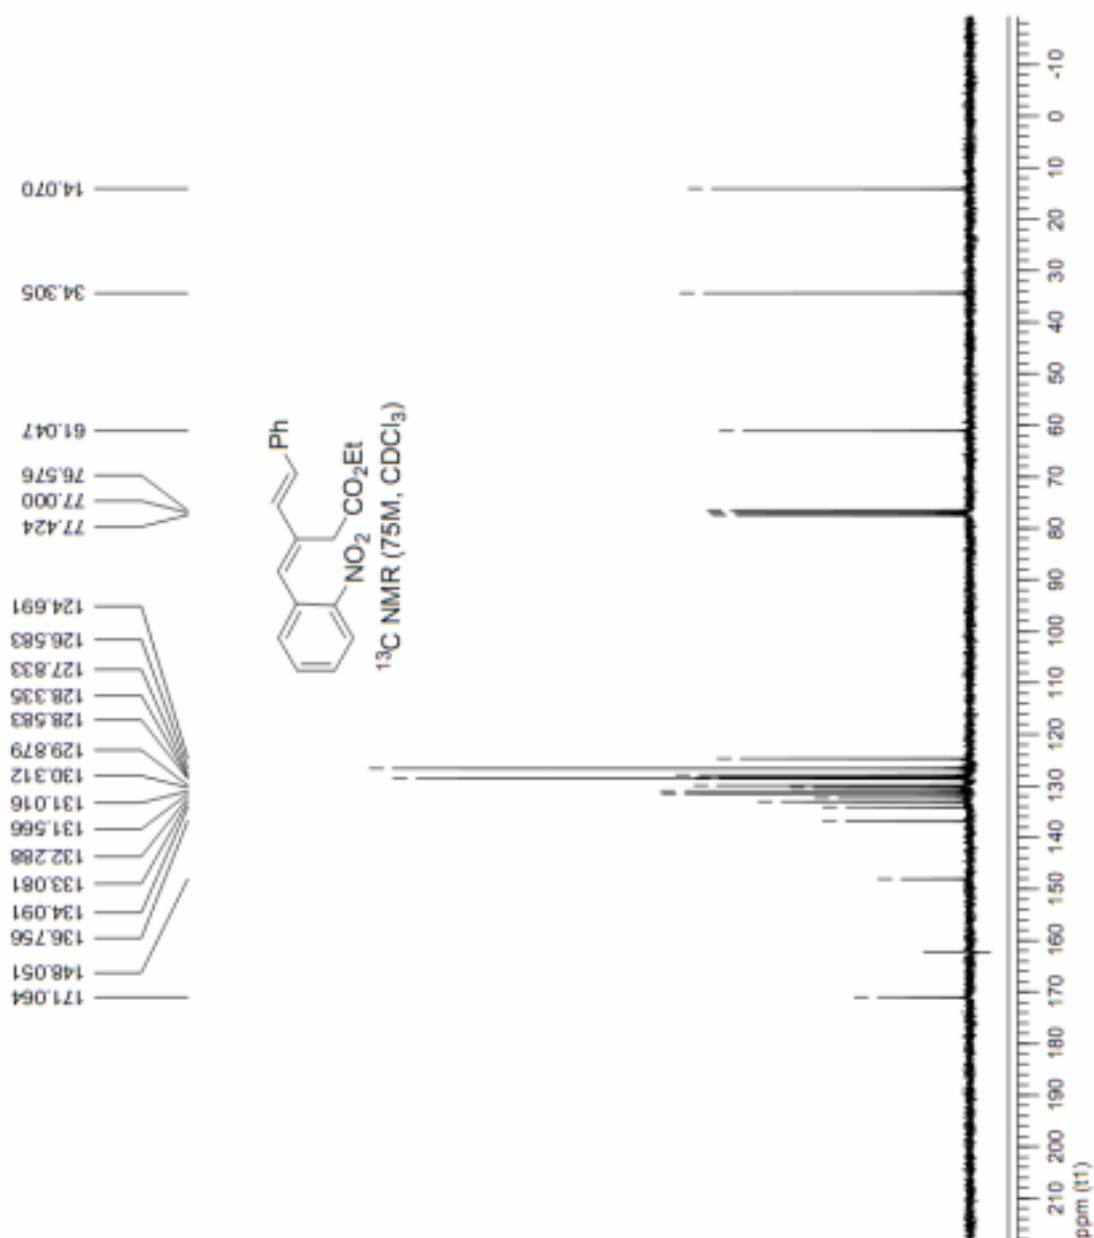

Date: 25 Jun 2009  
 Document's Title: 3aNO2-H.mrc  
 Spectrum Title: None  
 Frequency (MHz): F1 300.132  
 Original Points Count: F1 9256  
 Actual Points Count: F1 32768  
 Acquisition Time (sec): F1 1.4598  
 Spectral Width (ppm): F1 20.567  
 Pulse Program: zgpg30  
 Temperature: 29.5  
 Number of Scans: 6  
 Acq. Date: Tue Nov 06 12:02:30 AM

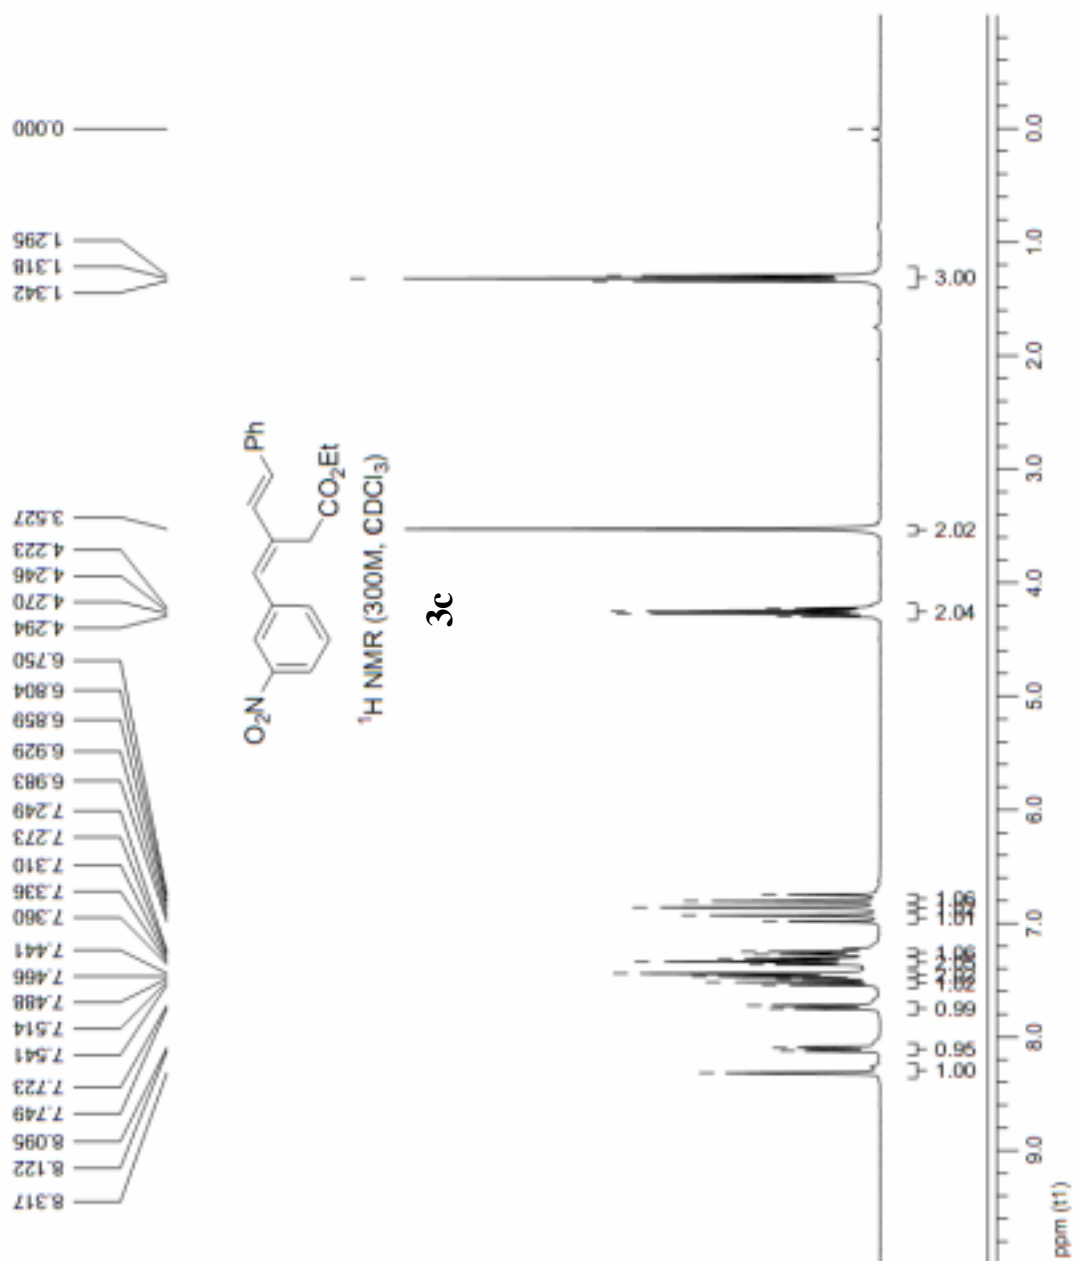

Date: 14 Apr 2009  
 Document's Title: 2aC.mrc  
 Spectrum Title: None  
 Frequency (MHz): (F1) 75.468  
 Original Points Count: (F1) 32768  
 Actual Points Count: (F1) 32768  
 Acquisition Time (sec): (F1) 1.8219  
 Spectral Width (ppm): (F1) 230.322  
 Pulse Program: Unknown

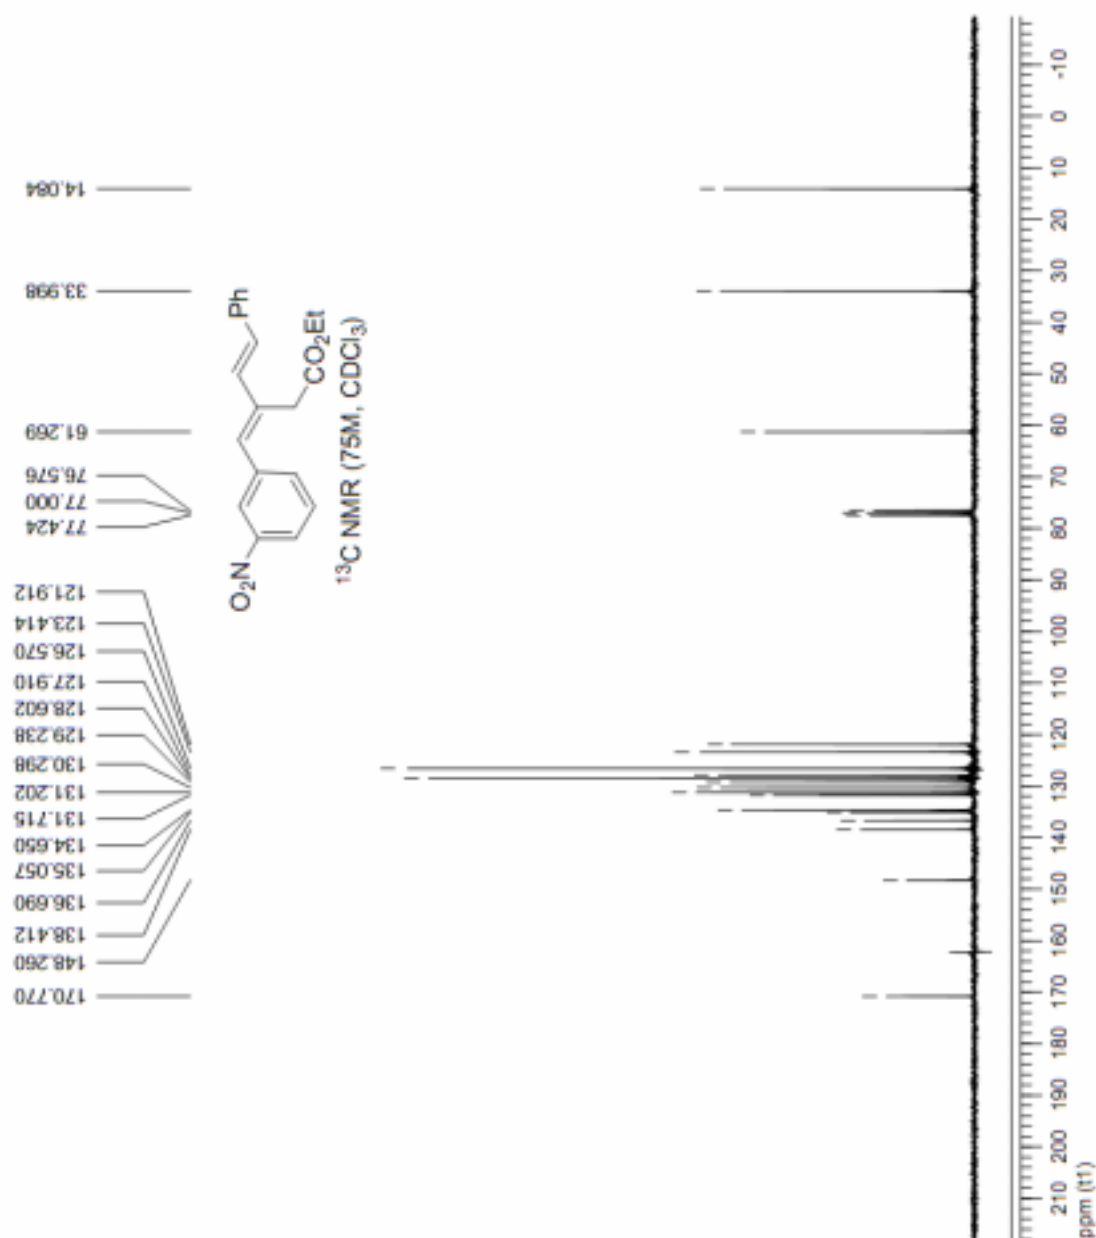

Date: 25 Jun 2009  
 Document's Title: 4-NO2-H.mtc  
 Spectrum Title: None  
 Frequency (MHz): (F1) 300.132  
 Original Points Count: (F1) 9256  
 Actual Points Count: (F1) 32768  
 Acquisition Time (sec): (F1) 1.4598  
 Spectral Width (ppm): (F1) 20.567  
 Pulse Program: zgpg30  
 Temperature: 295.9  
 Number of Scans: 6  
 Acq. Date: Tue Oct 30 08:35:06 AM

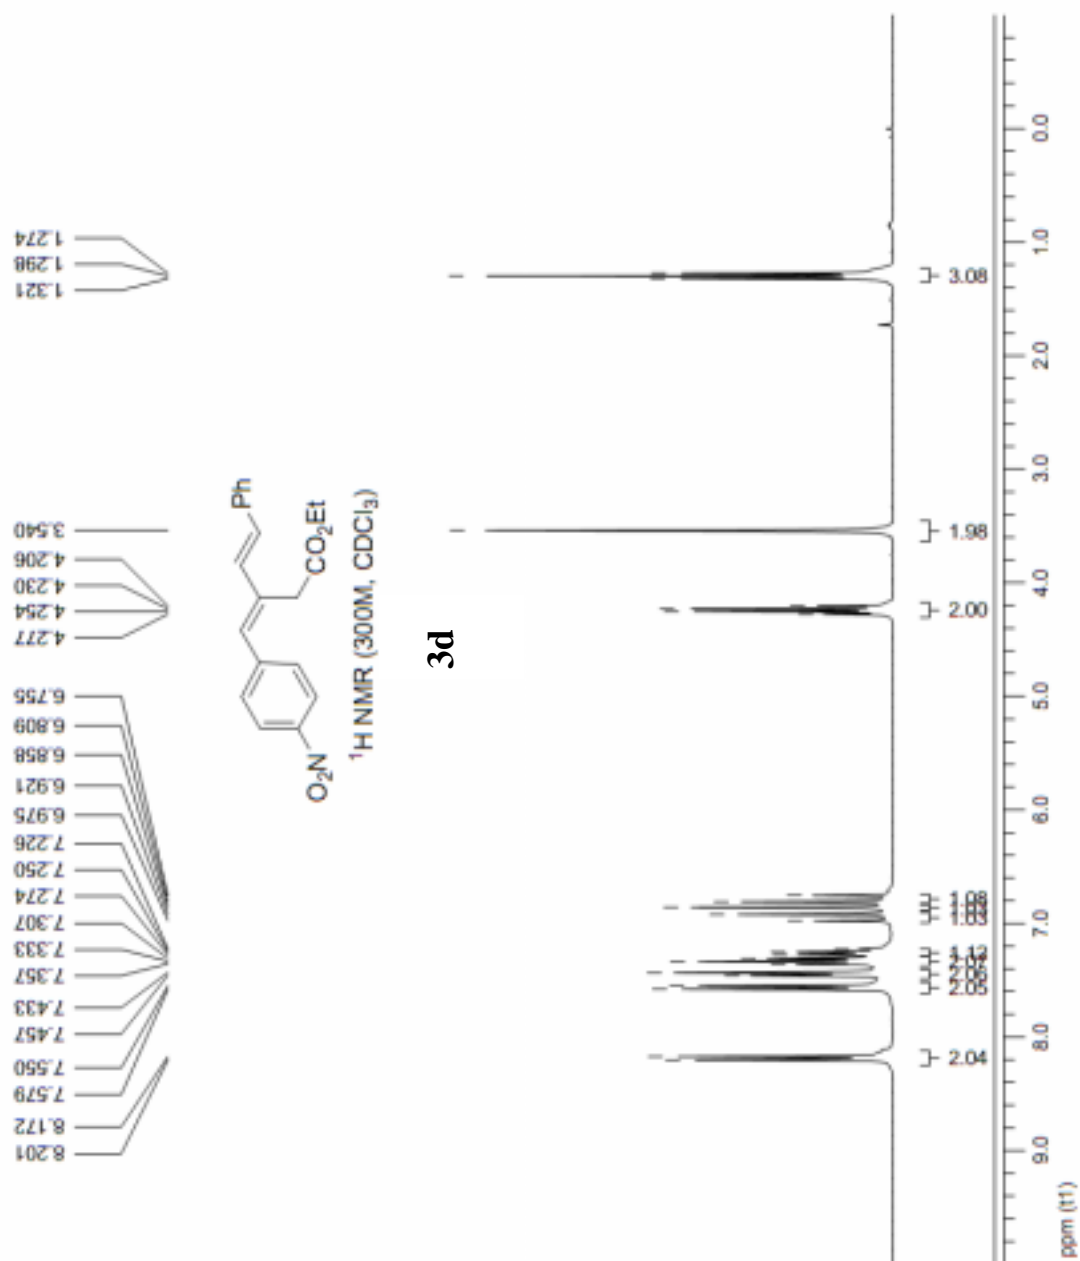

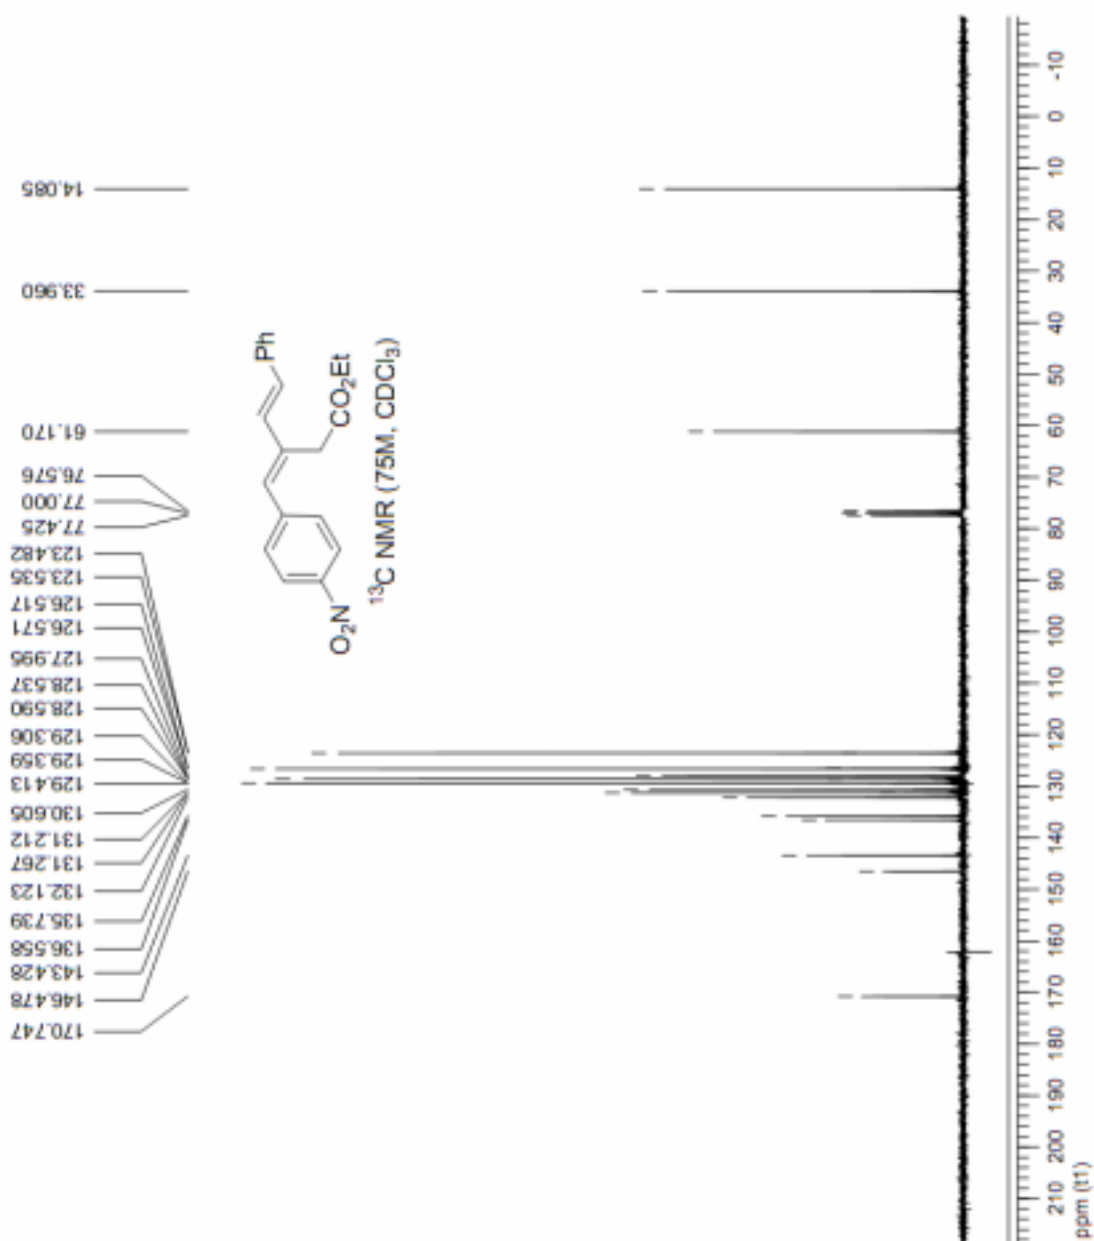

Date: 14 Apr 2009  
 Document's Title: 1r  
 Spectrum Title: None  
 Frequency (MHz): (f1) 75.468  
 Original Points Count: (f1) 32768  
 Actual Points Count: (f1) 32768  
 Acquisition Time (sec): (f1) 1.8219  
 Spectral Width (ppm): (f1) 238.322  
 Pulse Program: Unknown

|                         |                        |
|-------------------------|------------------------|
| Date:                   | 14 Apr 2009            |
| Document's Title:       |                        |
| fid                     |                        |
| Spectrum Title:         | None                   |
| Frequency (MHz):        | (f1) 300.132           |
| Original Points Count:  | (f1) 9258              |
| Actual Points Count:    | (f1) 32768             |
| Acquisition Time (sec): | (f1) 1.4998            |
| Spectral Width (ppm):   | (f1) 20.567            |
| Pulse Program:          | ZG30                   |
| Temperature:            | 298.4                  |
| Number of Scans:        | 8                      |
| Acq. Date:              | Wed Nov 26 08:07:50 PM |

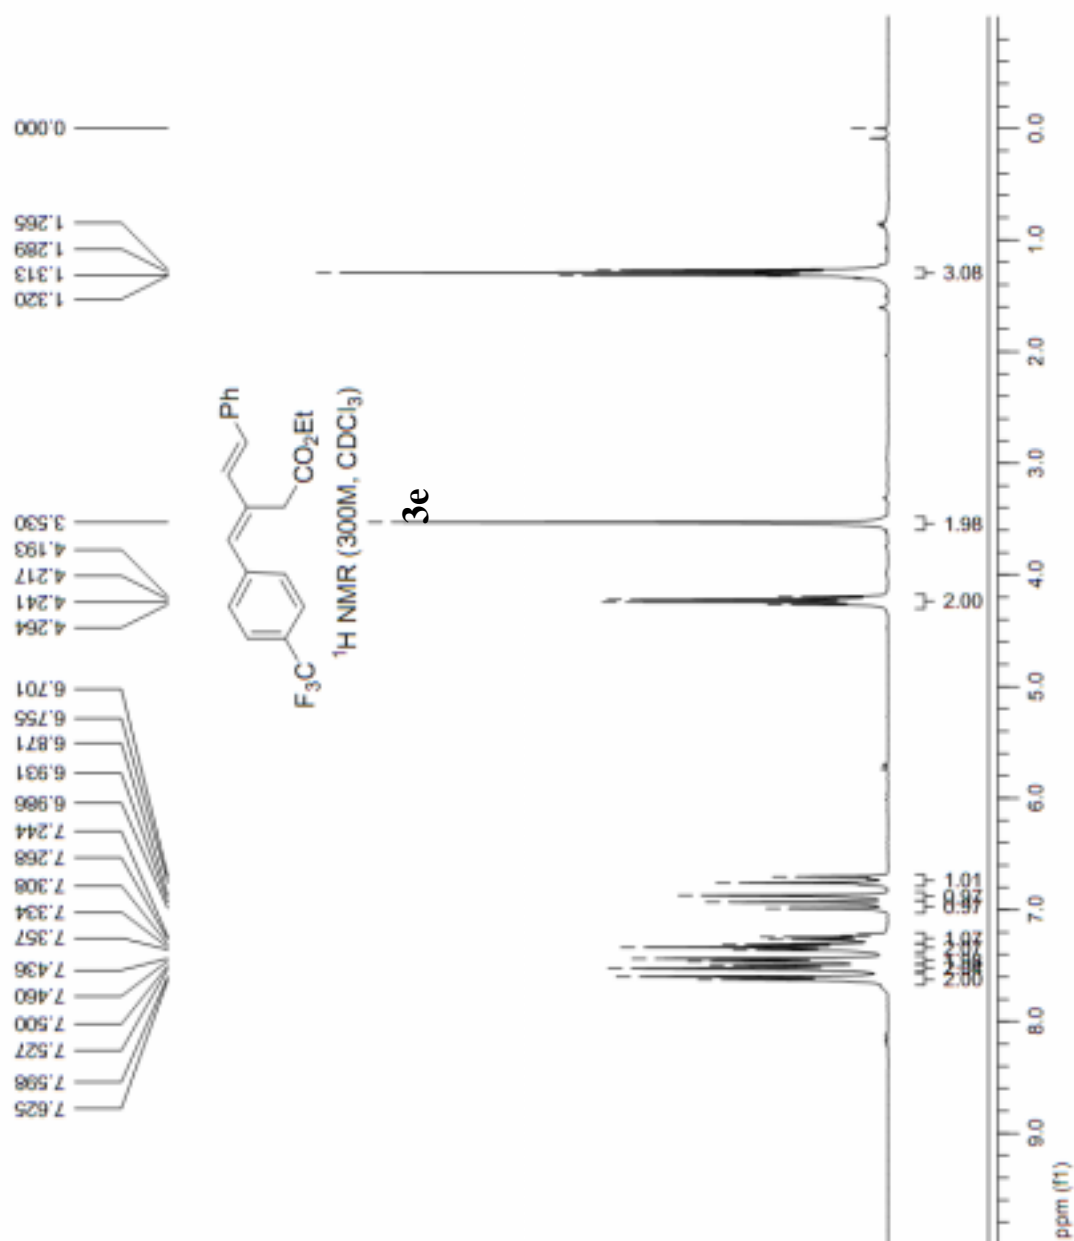

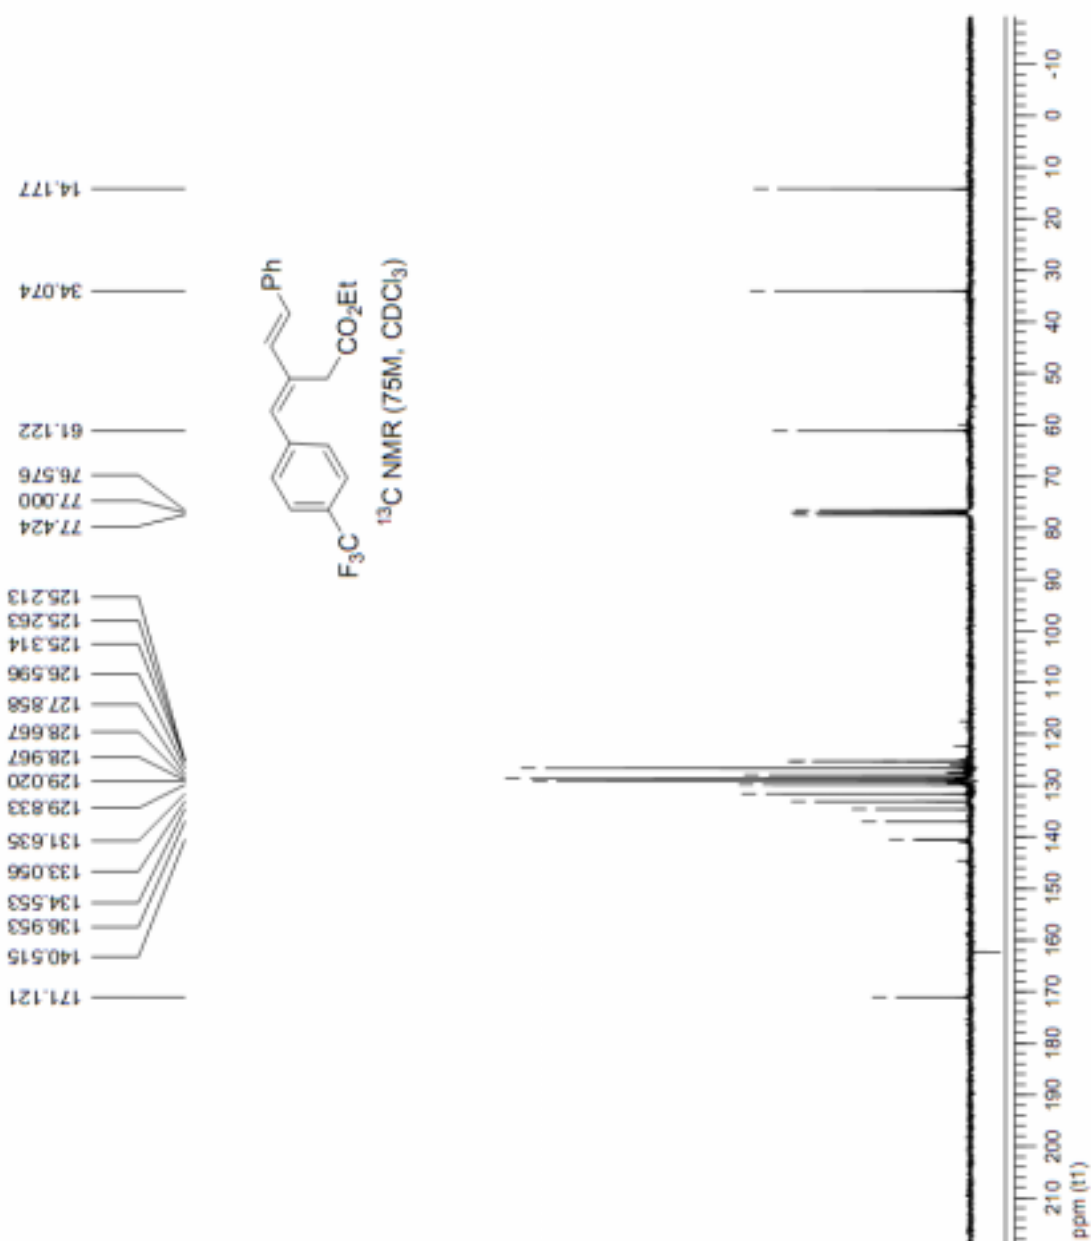

Date: 14 Apr 2009  
 Document's Title: 1r  
 Spectrum Title: None  
 Frequency (MHz): (f1) 75.468  
 Original Points Count: (f1) 32768  
 Actual Points Count: (f1) 32768  
 Acquisition Time (sec): (f1) 1.8219  
 Spectral Width (ppm): (f1) 238.322  
 Pulse Program: Unknown

|                         |                        |
|-------------------------|------------------------|
| Date:                   | 14 Apr 2009            |
| Document's Title:       |                        |
| fid                     |                        |
| Spectrum Title:         | None                   |
| Frequency (MHz):        | (f1) 300.132           |
| Original Points Count:  | (f1) 11110             |
| Actual Points Count:    | (f1) 32768             |
| Acquisition Time (sec): | (f1) 1.7998            |
| Spectral Width (ppm):   | (f1) 20.567            |
| Pulse Program:          | ZG30                   |
| Temperature:            | 873.2                  |
| Number of Scans:        | 8                      |
| Acq. Date:              | Fin Dec 21 04:24:10 PM |

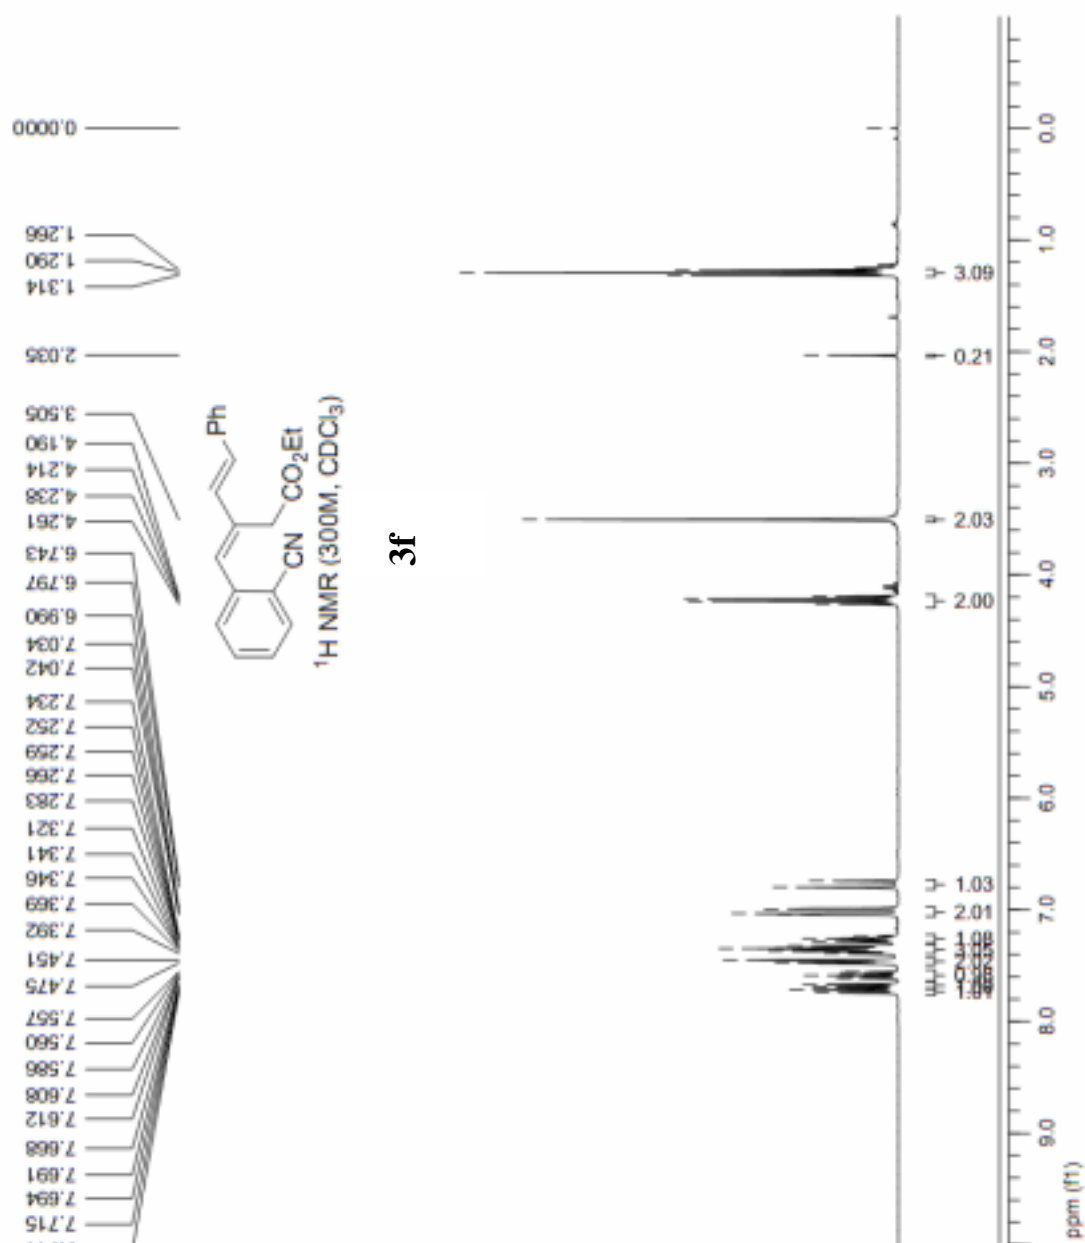

170.917  
140.232  
136.633  
136.310  
132.866  
132.520  
131.115  
130.677  
130.004  
129.298  
128.695  
128.621  
128.549  
128.000  
127.563  
126.740  
126.667  
126.596  
117.690  
112.443  
77.424  
77.000  
76.576  
61.130  
34.237  
14.119

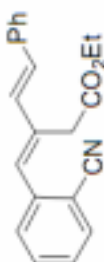

<sup>13</sup>C NMR (75M, CDCl<sub>3</sub>)

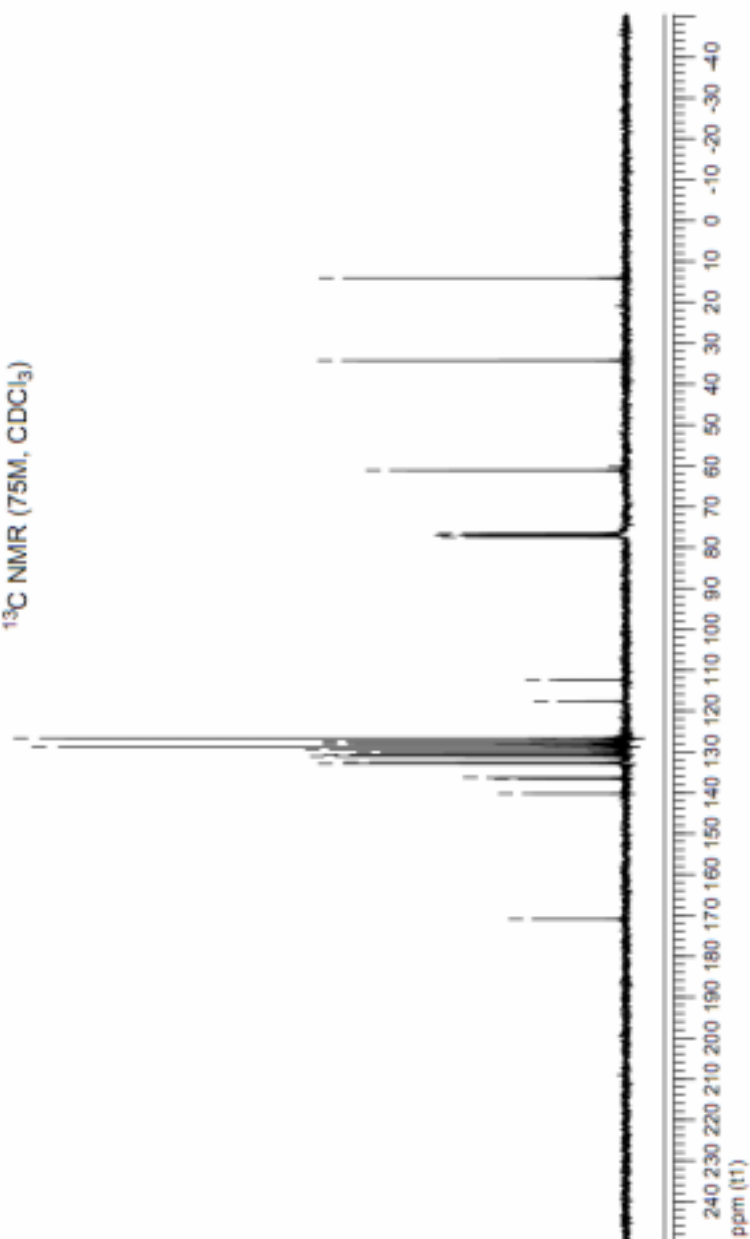

Date:  
14 Apr 2009  
Document's Title:  
1  
Spectrum Title:  
None  
Frequency (MHz):  
(f1) 75.468  
Original Points Count:  
(f1) 32768  
Actual Points Count:  
(f1) 32768  
Acquisition Time (sec):  
(f1) 1.4451  
Spectral Width (ppm):  
(f1) 300.469  
Pulse Program:  
Unknown



Date: 14 Apr 2009  
 Document's Title: 2gC.mrc  
 Spectrum Title: None  
 Frequency (MHz): (f1) 75.468  
 Original Points Count: (f1) 32768  
 Actual Points Count: (f1) 32768  
 Acquisition Time (sec): (f1) 1.8219  
 Spectral Width (ppm): (f1) 230.322  
 Pulse Program: Unknown

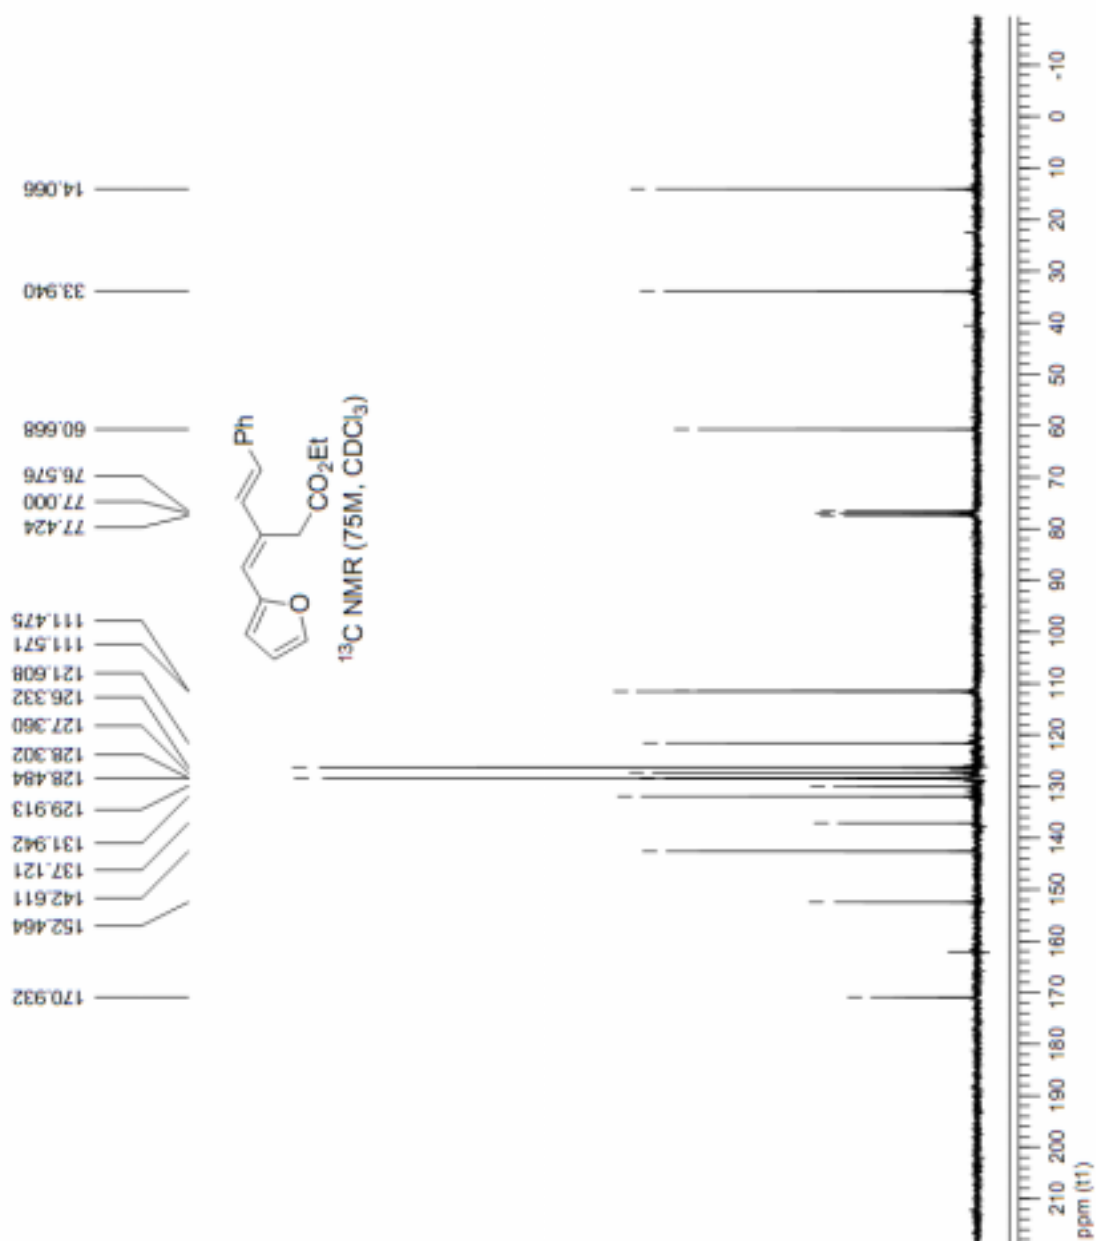



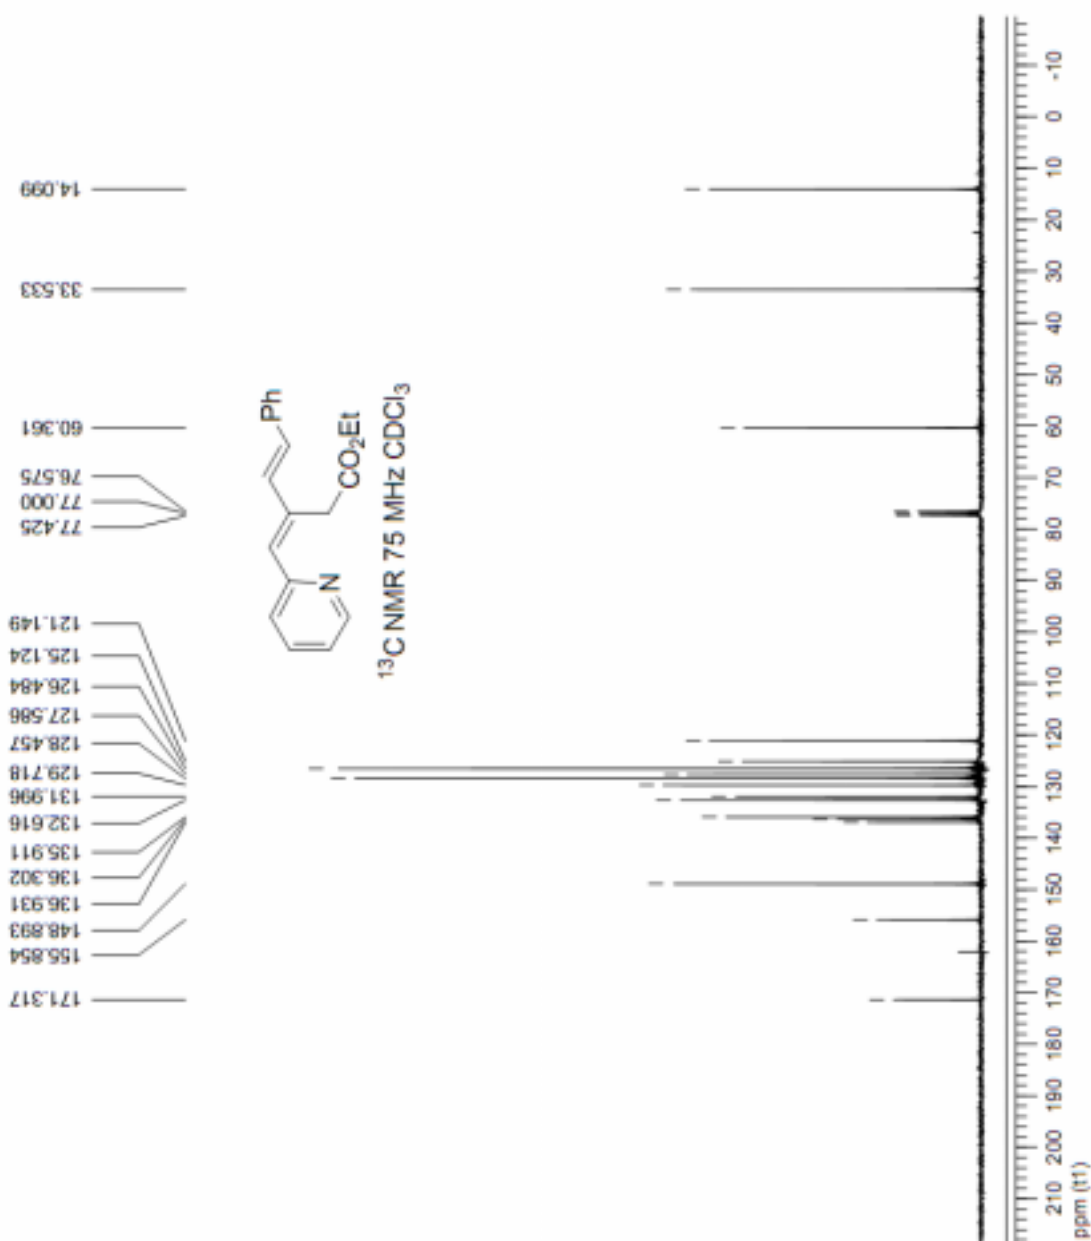

Date: 14 Apr 2009  
 Document's Title: 2C.mrc  
 Spectrum Title: None  
 Frequency (MHz): (F1) 75.468  
 Original Points Count: (F1) 32768  
 Actual Points Count: (F1) 32768  
 Acquisition Time (sec): (F1) 1.8219  
 Spectral Width (ppm): (F1) 230.322  
 Pulse Program: Unknown

|                         |                        |
|-------------------------|------------------------|
| Date:                   | 14 Apr 2009            |
| Document's Title:       | fid                    |
| Spectrum Title:         | None                   |
| Frequency (MHz):        | (f1) 300.132           |
| Original Points Count:  | (f1) 9258              |
| Actual Points Count:    | (f1) 32768             |
| Acquisition Time (sec): | (f1) 1.4998            |
| Spectral Width (ppm):   | (f1) 20.567            |
| Pulse Program:          | ZG30                   |
| Temperature:            | 295.5                  |
| Number of Scans:        | 8                      |
| Acq. Date:              | Sat Nov 17 04:37:14 PM |

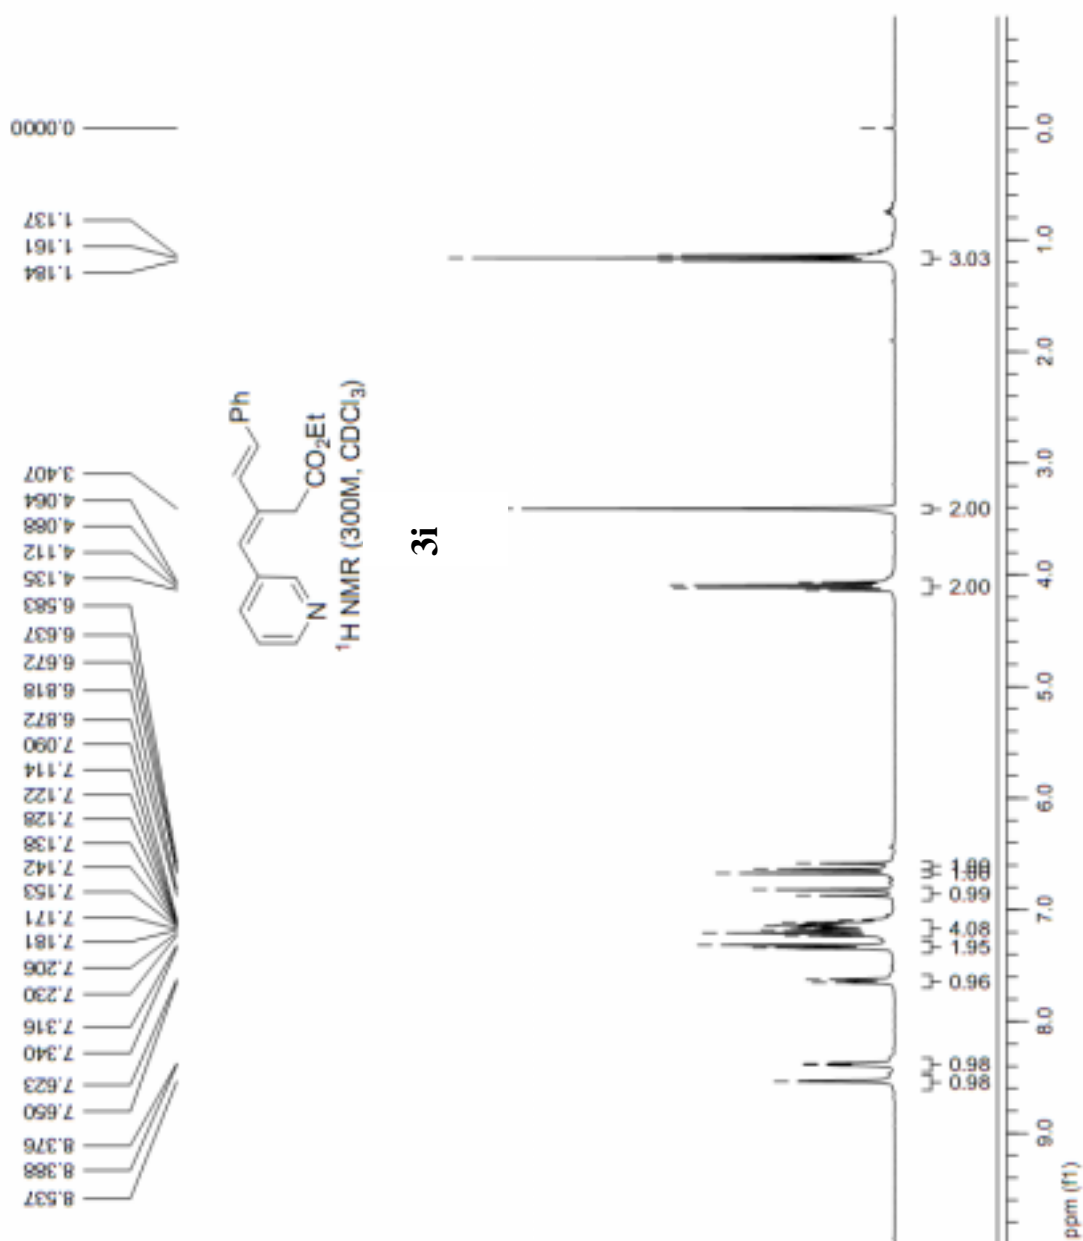

Date: 14 Apr 2009  
 Document's Title: ZnC.mrc  
 Spectrum Title: None  
 Frequency (MHz): (F1) 75.468  
 Original Points Count: (F1) 32768  
 Actual Points Count: (F1) 32768  
 Acquisition Time (sec): (F1) 1.8219  
 Spectral Width (ppm): (F1) 238.322  
 Pulse Program: Unknown

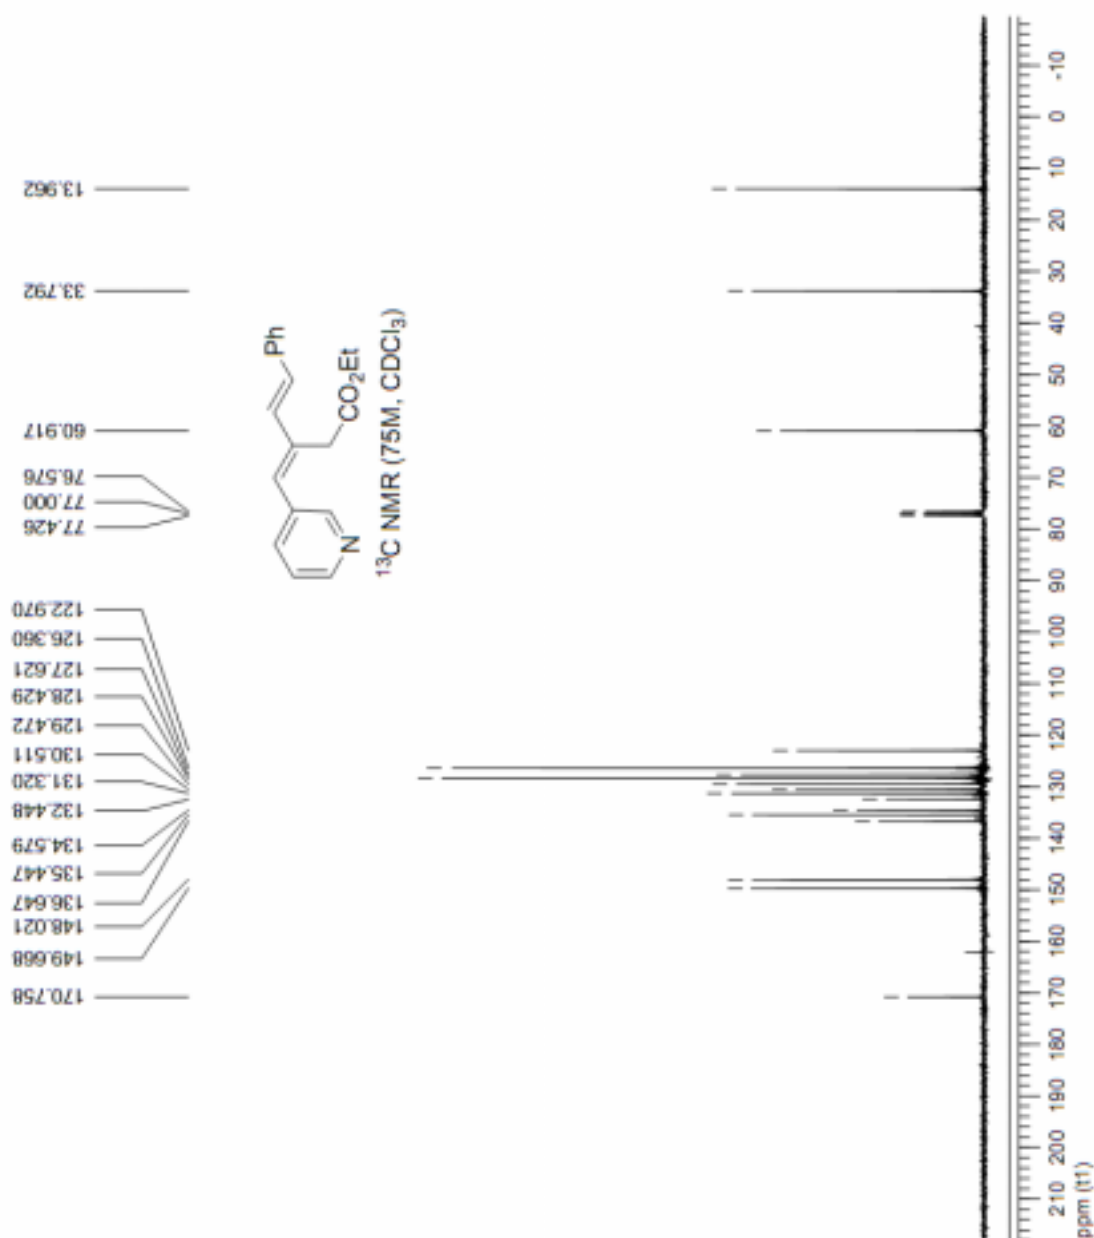



Date: 14 Apr 2009  
 Document's Title: 1r  
 Spectrum Title: None  
 Frequency (MHz): (f1) 75.468  
 Original Points Count: (f1) 32768  
 Actual Points Count: (f1) 32768  
 Acquisition Time (sec): (f1) 1.8219  
 Spectral Width (ppm): (f1) 238.322  
 Pulse Program: Unknown

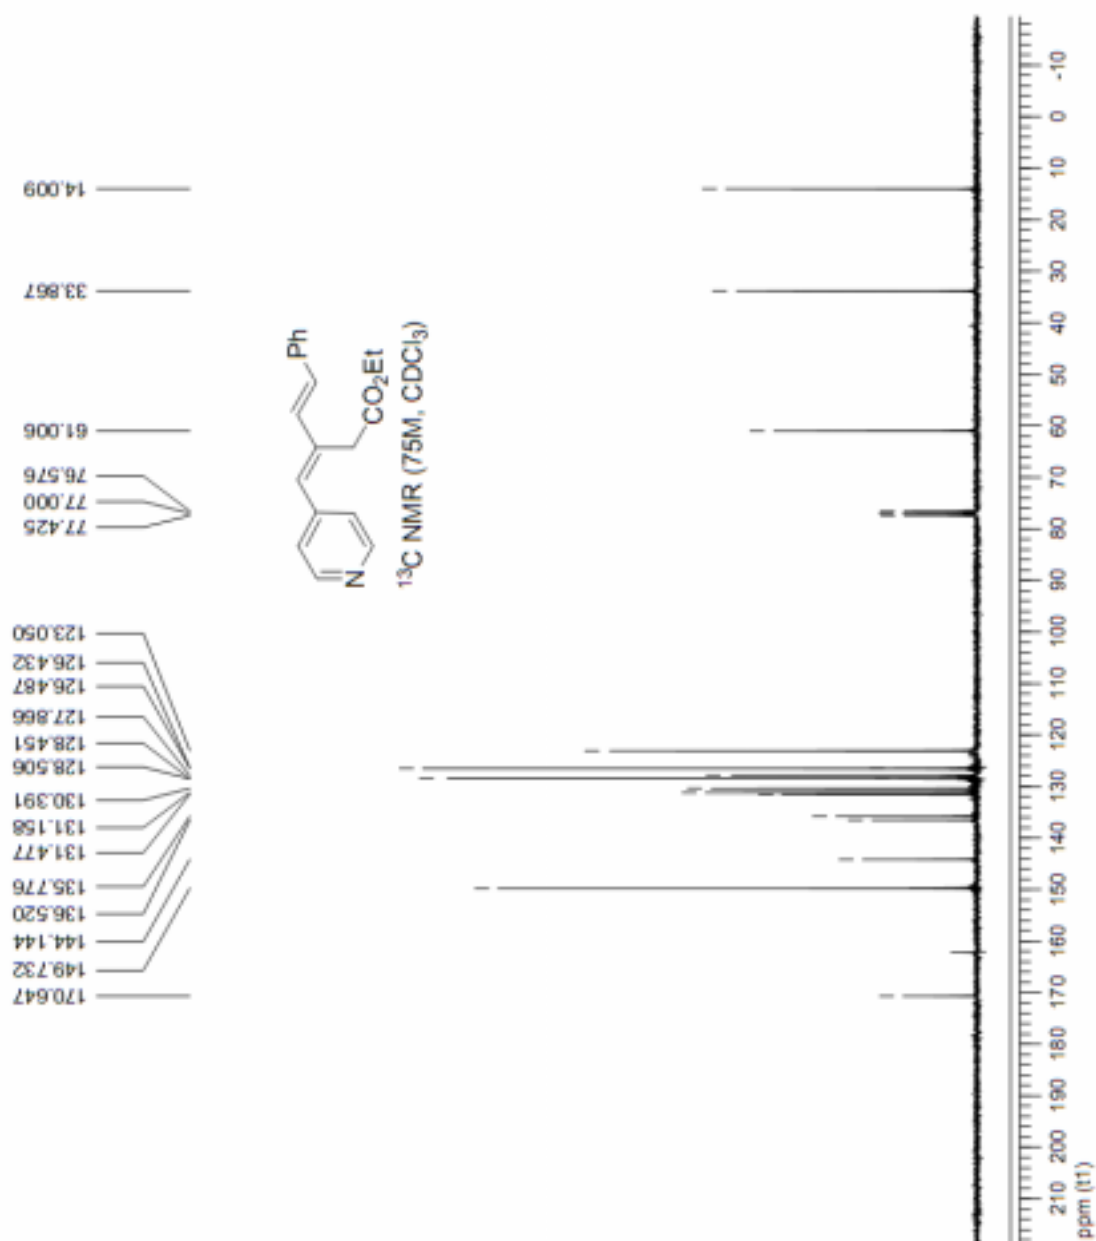

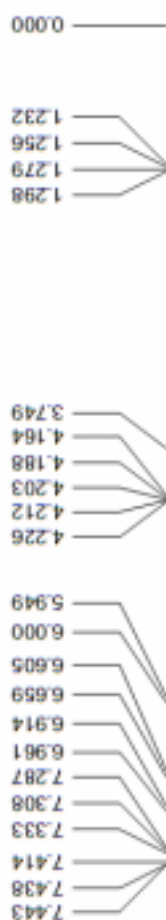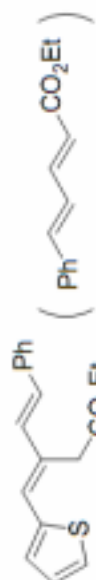

<sup>1</sup>H NMR (300M, CDCl<sub>3</sub>) **4**

**3k**

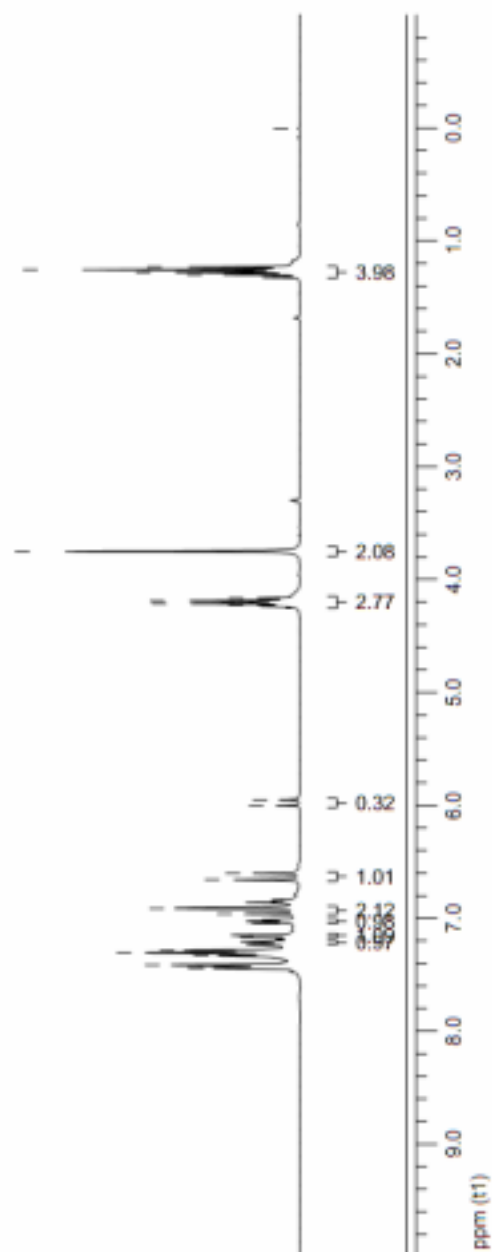

Date: 28 Jun 2009  
 Document's Title: 2-thiophenyl-4-mmc  
 Spectrum Title: None  
 Frequency (MHz): (F1) 300.130  
 Original Points Count: (F1) 32768  
 Actual Points Count: (F1) 32768  
 Acquisition Time (sec): (F1) 5.3084  
 Spectral Width (ppm): (F1) 20.567  
 Pulse Program: Unknown

Date: 25 Jun 2009  
 Document's Title: 2-thioaryl-C.mrc  
 Spectrum Title: None  
 Frequency (MHz): (F1) 75.468  
 Original Points Count: (F1) 32768  
 Actual Points Count: (F1) 32768  
 Acquisition Time (sec): (F1) 1.8219  
 Spectral Width (ppm): (F1) 238.322  
 Pulse Program: Unknown

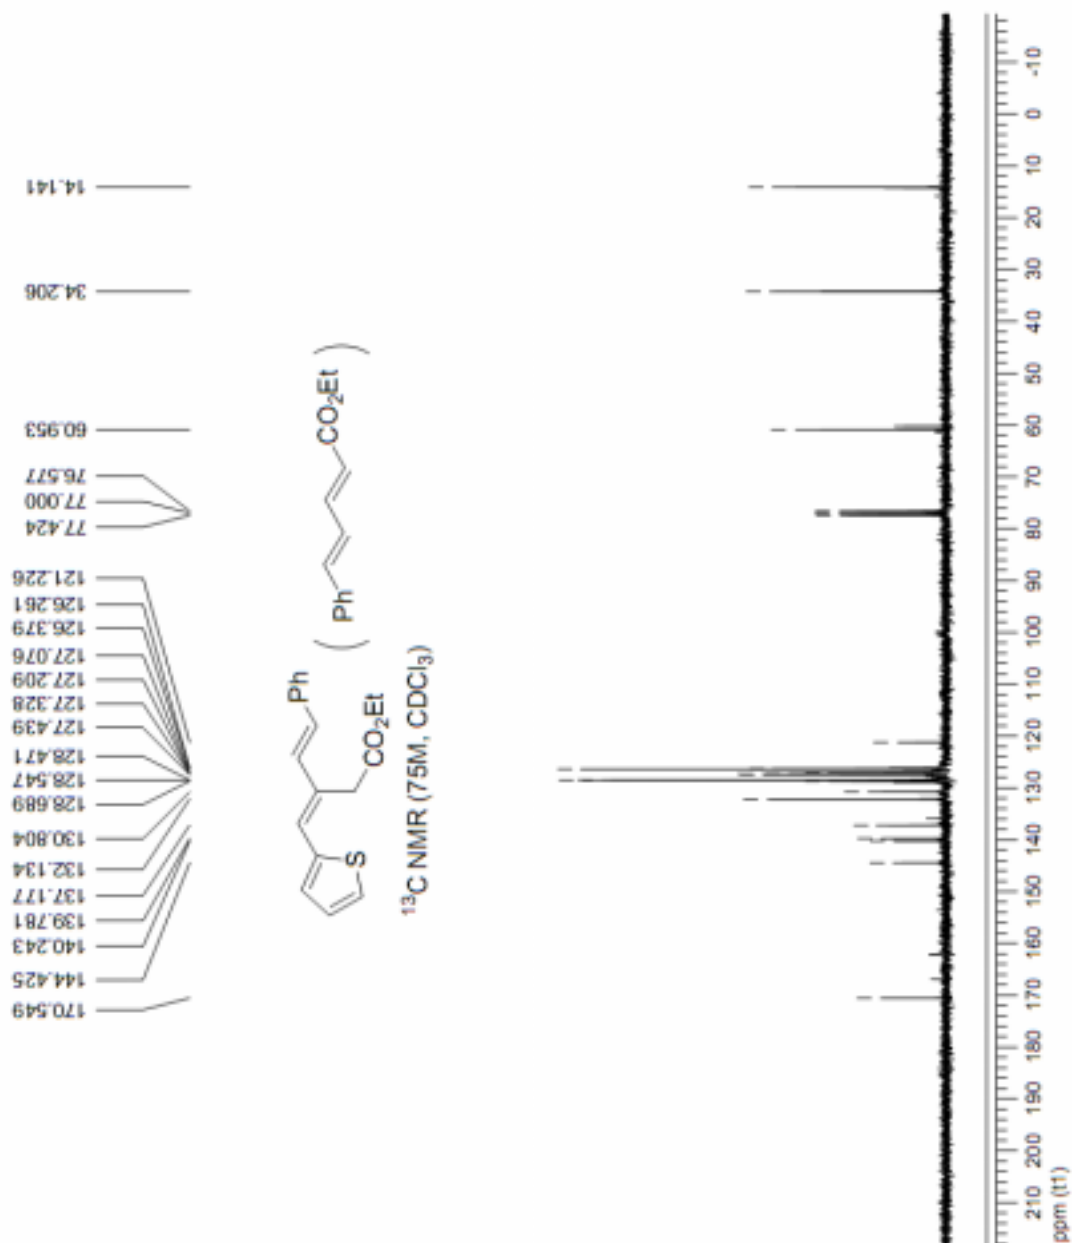

Date: 25 Jun 2009  
 Document's Title: Ph-H.mtc  
 Spectrum Title: None  
 Frequency (MHz): F1 300.132  
 Original Points Count: F1 9256  
 Actual Points Count: F1 32768  
 Acquisition Time (sec): F1 1.4598  
 Spectral Width (ppm): F1 20.567  
 Pulse Program: zgpg30  
 Temperature: 298.5  
 Number of Scans: 6  
 Acq. Date: Wed Dec 05 10:04:31 AM

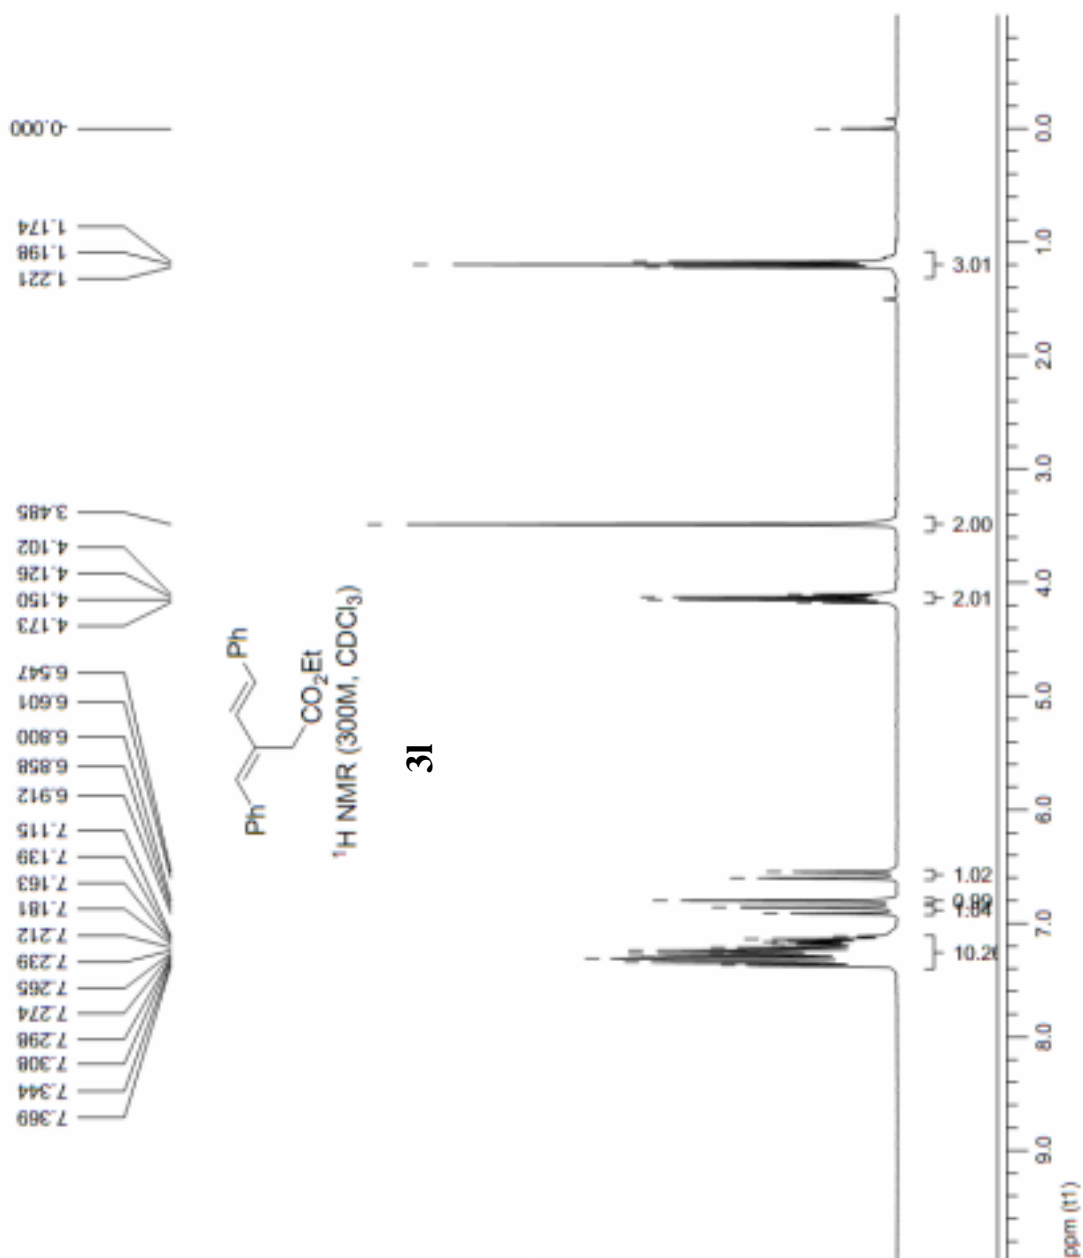

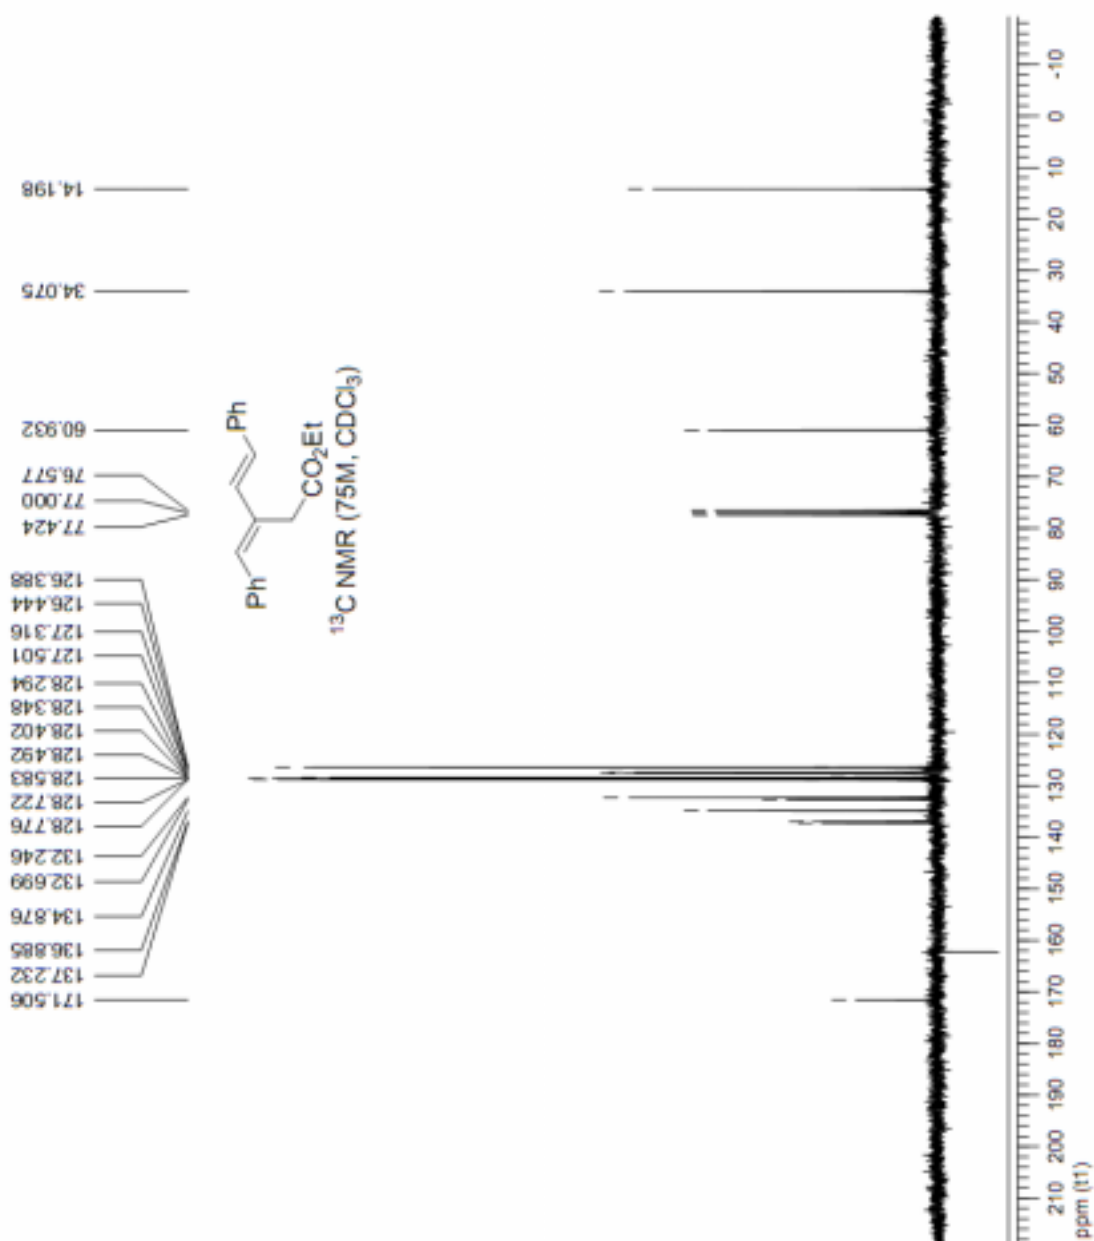

Date: 14 Apr 2009  
 Document's Title: 1r  
 Spectrum Title: None  
 Frequency (MHz): #1) 75.468  
 Original Points Count: #1) 32768  
 Actual Points Count: #1) 32768  
 Acquisition Time (sec): #1) 1.8219  
 Spectral Width (ppm): #1) 238.322  
 Pulse Program: Unknown

|                         |                     |
|-------------------------|---------------------|
| Date:                   | 24 May 2009         |
| Document's Title:       | 4-CH3-H.mtc         |
| Spectrum Title:         | STANDARD 1H OBSERVE |
| Frequency (MHz):        | (F1) 400.137        |
| Original Points Count:  | (F1) 6503           |
| Actual Points Count:    | (F1) 32768          |
| Acquisition Time (sec): | (F1) 1.4881         |
| Spectral Width (ppm):   | (F1) 15.020         |
| Pulse Program:          | Unknown             |
| Temperature:            | 18                  |
| Number of Scans:        | 1                   |
| Acq. Date:              | Apr 8 2008          |

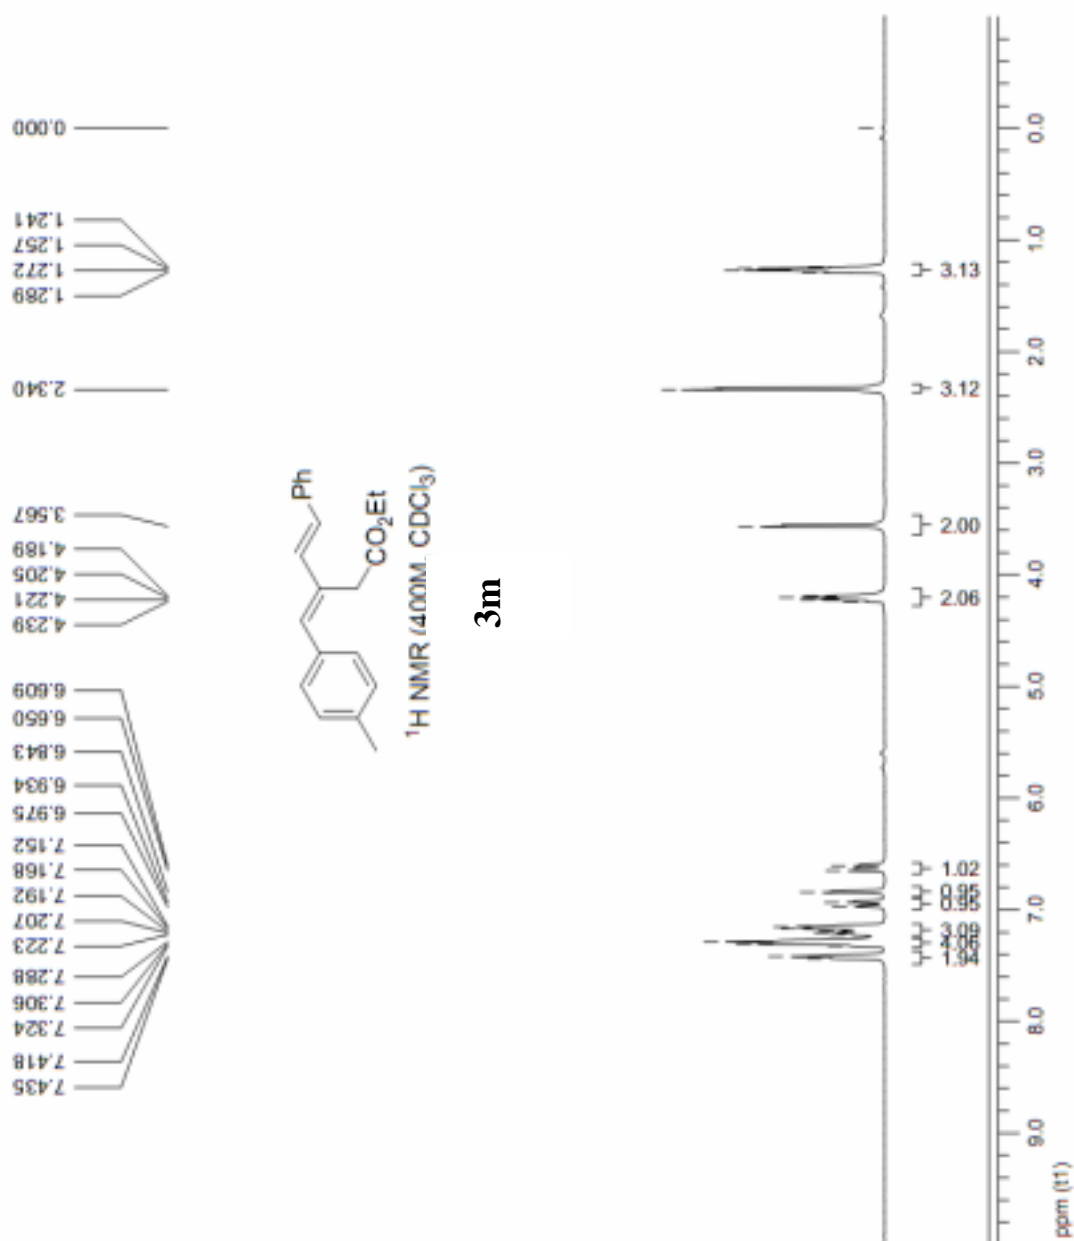

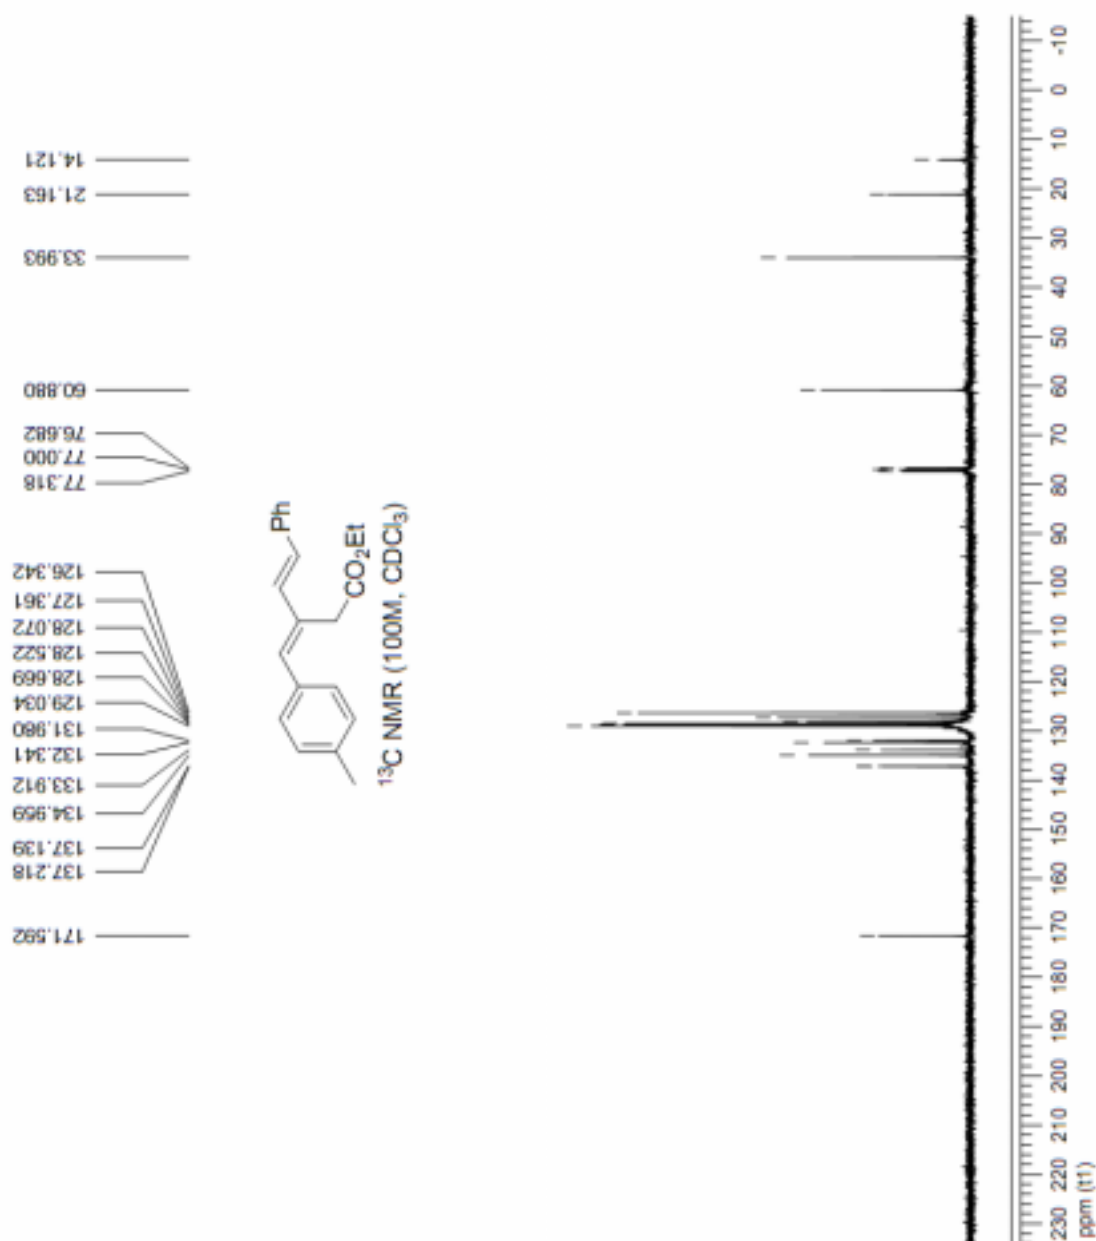

Date: 25 Jun 2009  
 Document's Title: 4-CH<sub>3</sub>-C.mmc  
 Spectrum Title: <sup>13</sup>C OBSERVE  
 Frequency (MHz): (f1) 100.625  
 Original Points Count: (f1) 7538  
 Actual Points Count: (f1) 15384  
 Acquisition Time (sec): (f1) 0.3008  
 Spectral Width (ppm): (f1) 249.070  
 Pulse Program: Unknown  
 Temperature: 18  
 Number of Scans: 1024  
 Acq. Date: Apr 8 2008

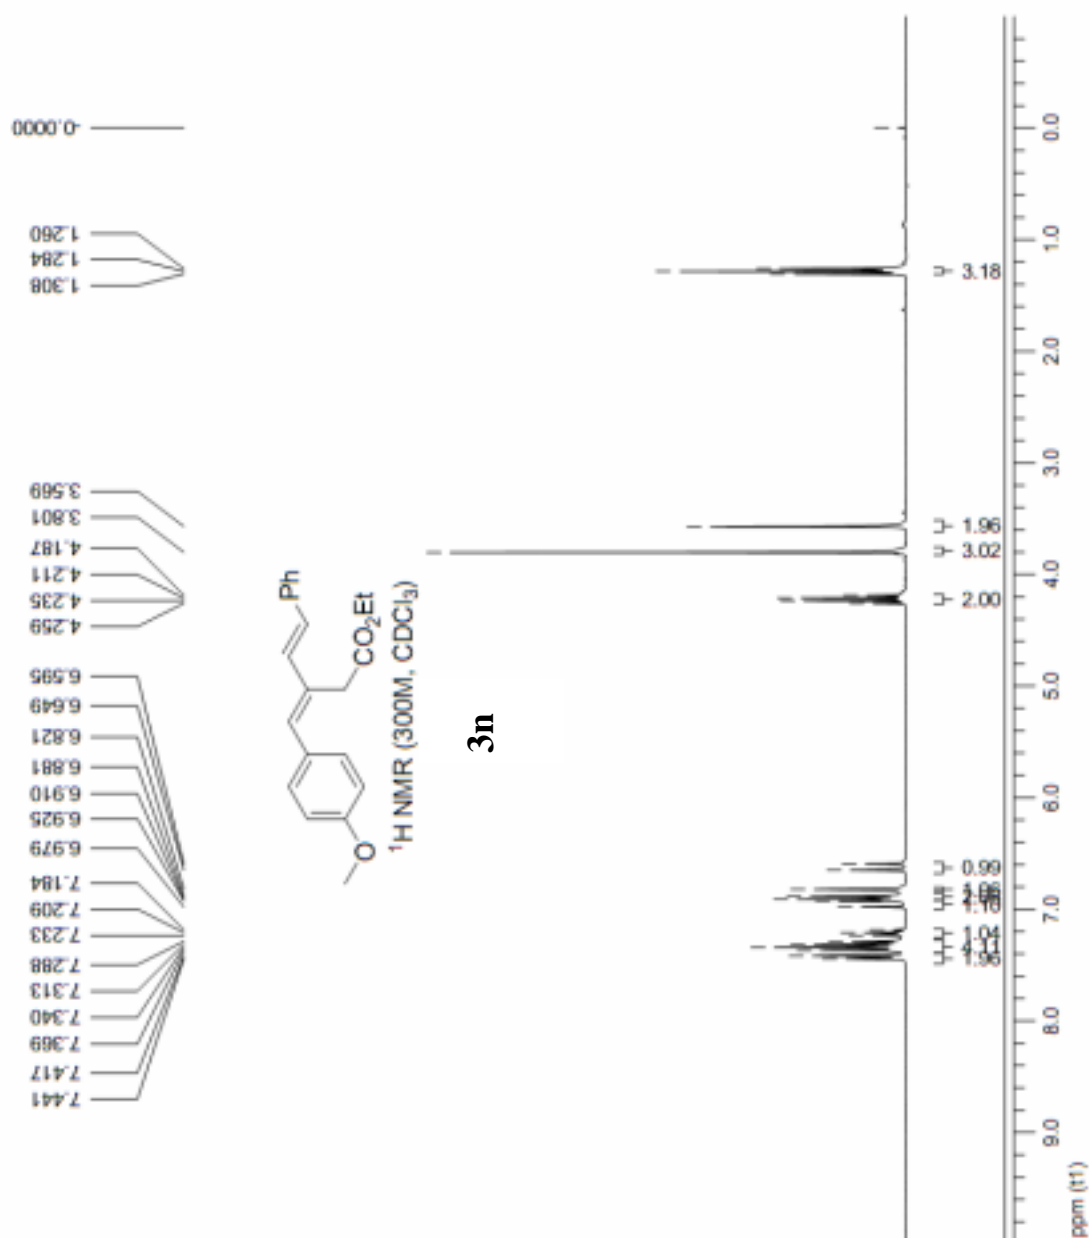

Date: 24 May 2009  
 Document's Title: 4-CH<sub>3</sub>-H.mrc  
 Spectrum Title: None  
 Frequency (MHz): (f1) 300.132  
 Original Points Count: (f1) 9256  
 Actual Points Count: (f1) 32768  
 Acquisition Time (sec): (f1) 1.4998  
 Spectral Width (ppm): (f1) 20.567  
 Pulse Program: zg30  
 Temperature: 295.3  
 Number of Scans: 8  
 Acq. Date: Mon Nov 19 12:35:40 AM

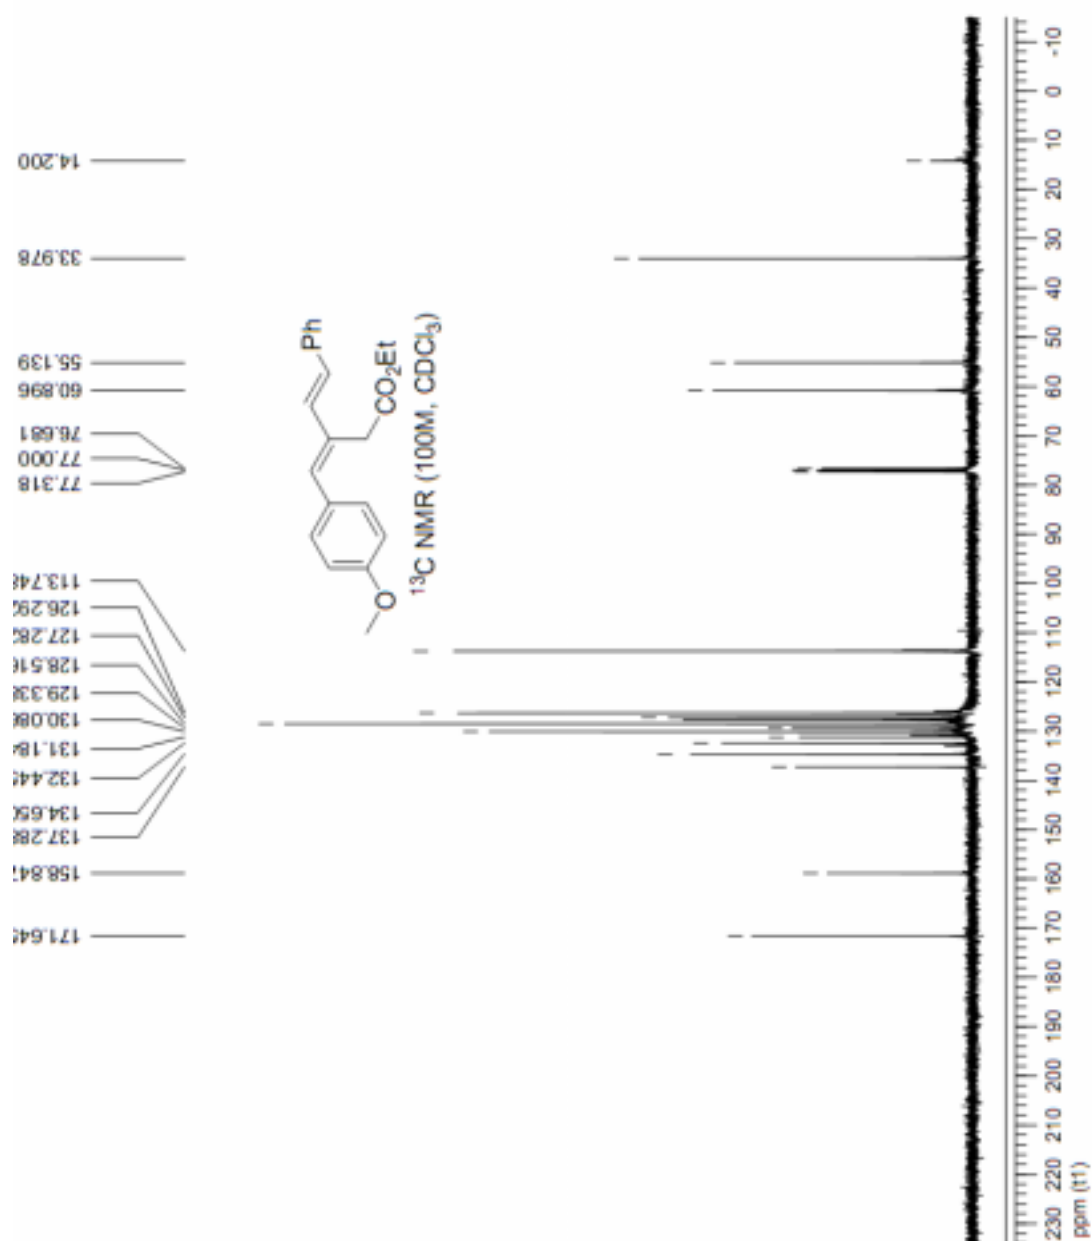

Date: 14 Apr 2009  
 Document's Title: 8d  
 Spectrum Title: <sup>13</sup>C OBSERVE  
 Frequency (MHz): (f1) 100.625  
 Original Points Count: (f1) 7538  
 Actual Points Count: (f1) 16384  
 Acquisition Time (sec): (f1) 0.3008  
 Spectral Width (ppm): (f1) 249.070  
 Pulse Program: Unknown  
 Temperature: 18  
 Number of Scans: 1024  
 Acq. Date: Mar 20 2008



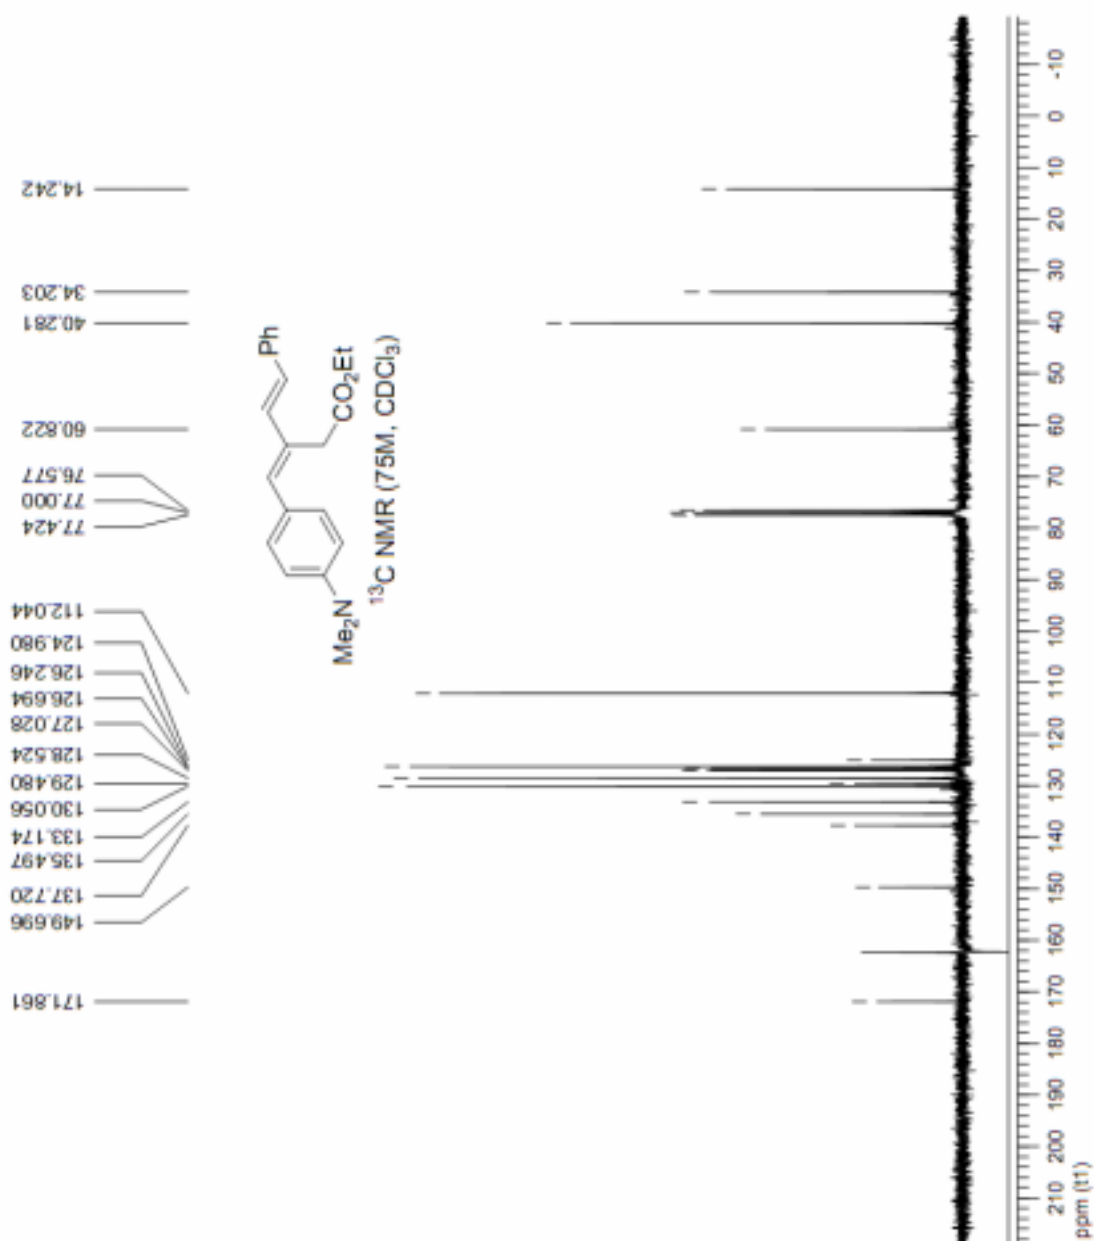

Date: 14 Apr 2009  
 Document's Title: 1r  
 Spectrum Title: None  
 Frequency (MHz): #1) 75.468  
 Original Points Count: #1) 32768  
 Actual Points Count: #1) 32768  
 Acquisition Time (sec): #1) 1.8219  
 Spectral Width (ppm): #1) 238.322  
 Pulse Program: Unknown

Date: 24 May 2009  
 Document's Title: ph=CH-H.mrc  
 Spectrum Title: None  
 Frequency (MHz): (F1) 300.132  
 Original Points Count: (F1) 9258  
 Actual Points Count: (F1) 32768  
 Acquisition Time (sec): (F1) 1.4998  
 Spectral Width (ppm): (F1) 20.567  
 Pulse Program: zg30  
 Temperature: 298.4  
 Number of Scans: 8  
 Acq. Date: Sun Dec 09 08:38:45 PM

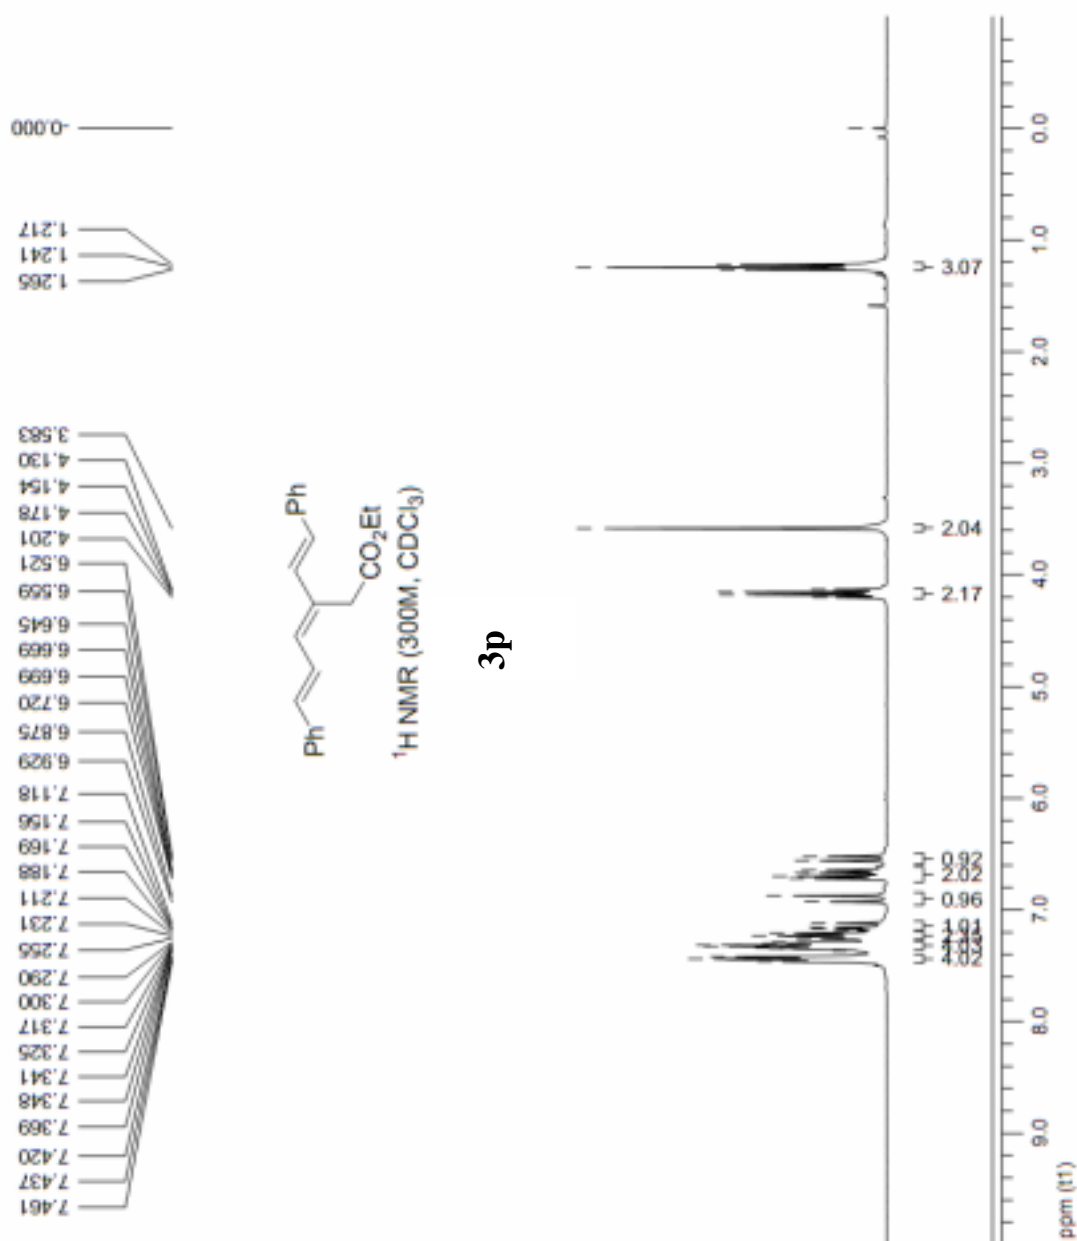

Date: 14 Apr 2009  
 Document's Title: 3eC.mrc  
 Spectrum Title: None  
 Frequency (MHz): #1 75.468  
 Original Points Count: #1 32768  
 Actual Points Count: #1 32768  
 Acquisition Time (sec): #1 1.8219  
 Spectral Width (ppm): #1 238.322  
 Pulse Program: Unknown

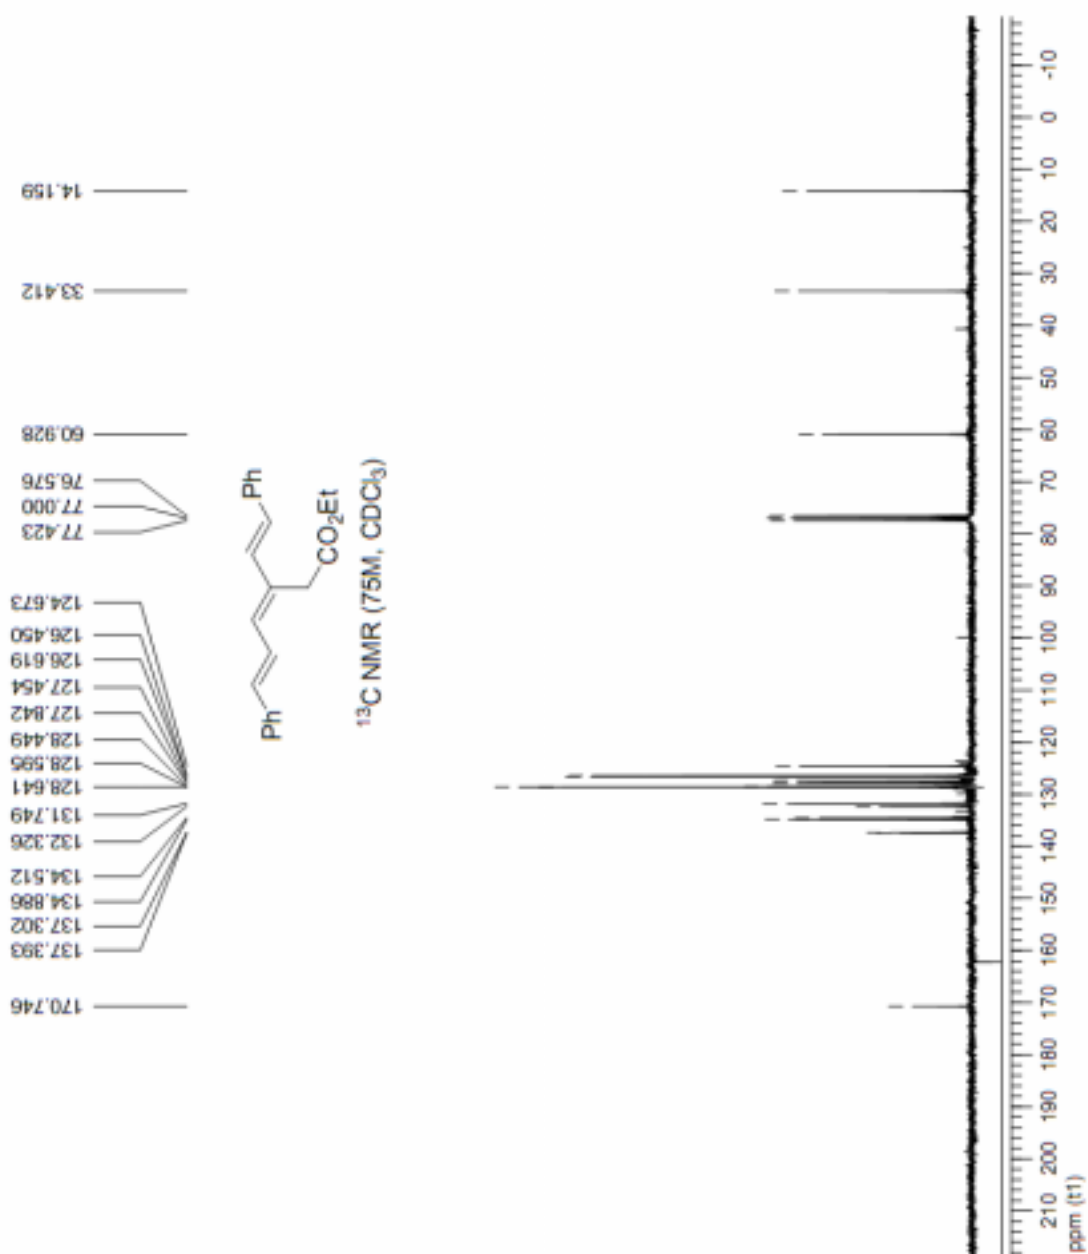



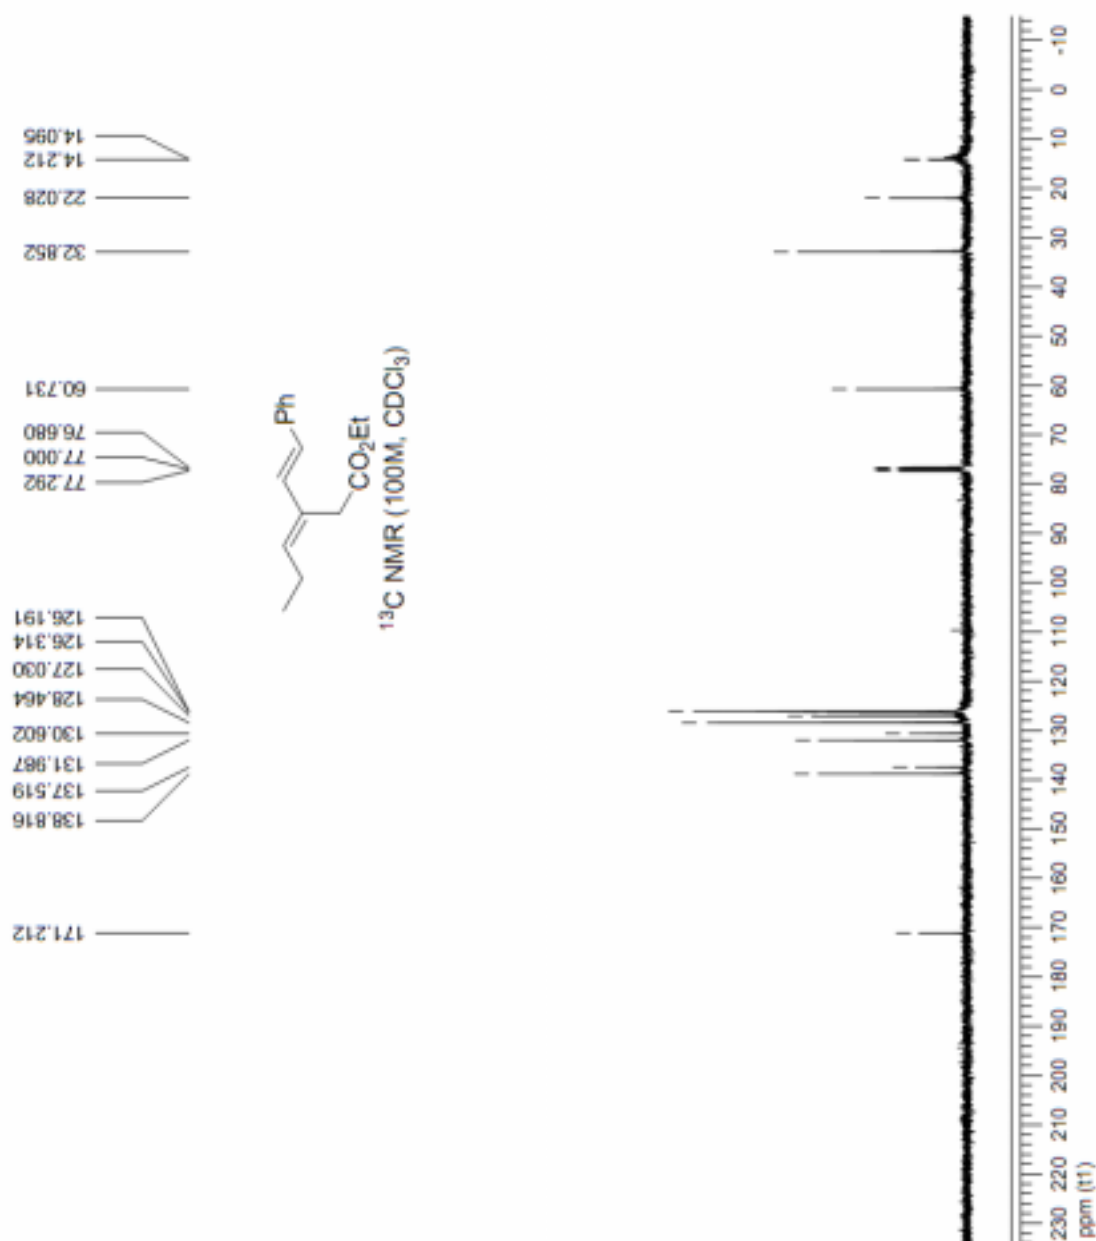



Date: 25 Jun 2009  
 Document's Title: butyl-C.mrc  
 Spectrum Title: None  
 Frequency (MHz): (F1) 75.468  
 Original Points Count: (F1) 32768  
 Actual Points Count: (F1) 32768  
 Acquisition Time (sec): (F1) 1.8219  
 Spectral Width (ppm): (F1) 238.322  
 Pulse Program: Unknown

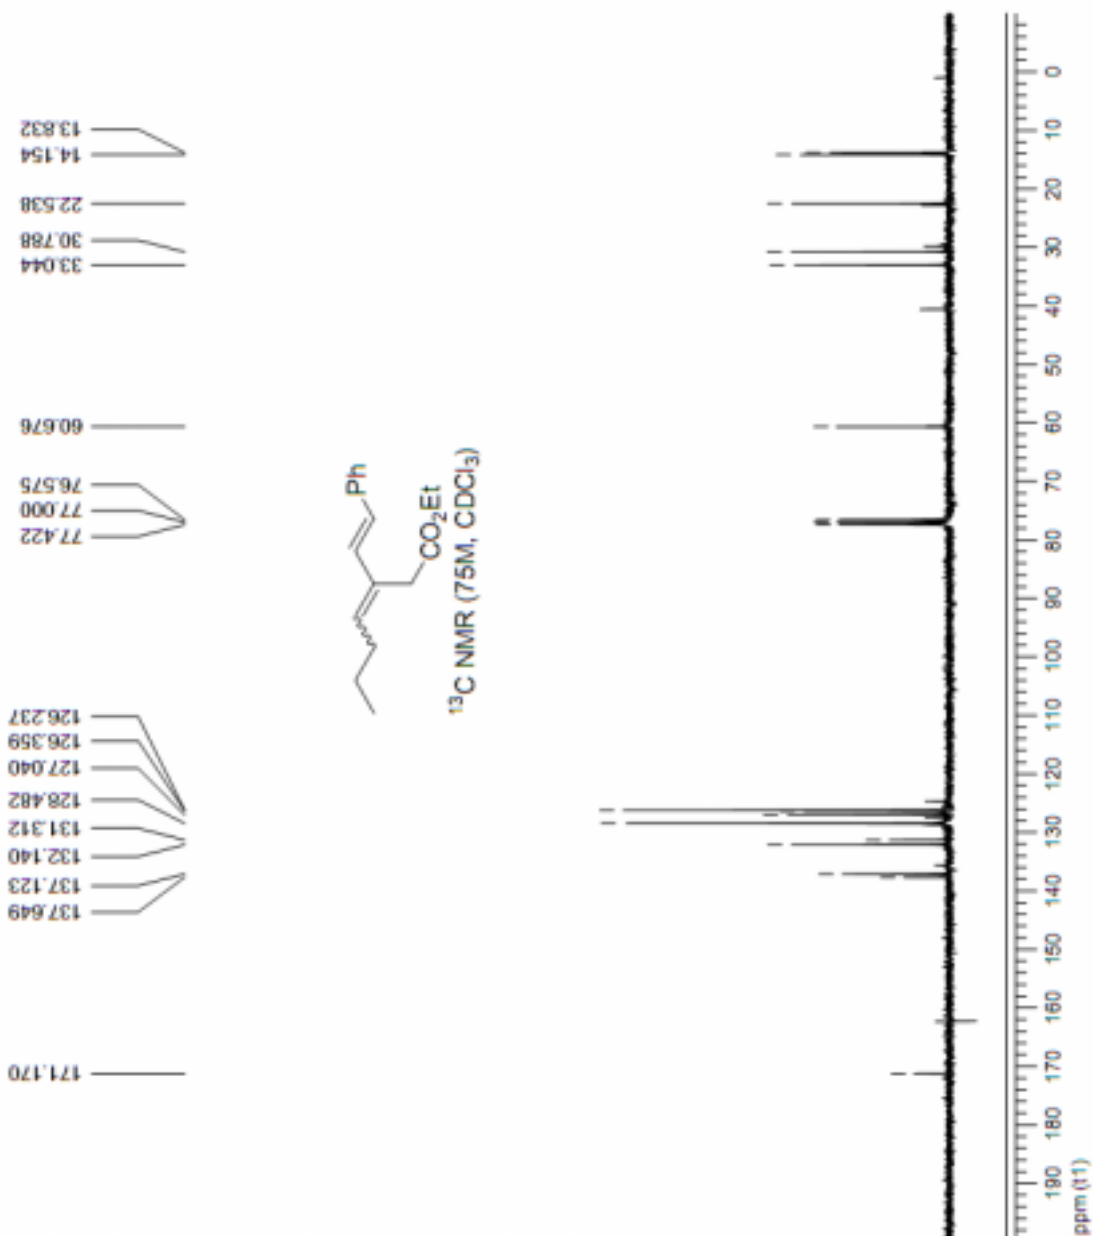

|                                               |                                               |
|-----------------------------------------------|-----------------------------------------------|
| <b>Date:</b><br>25 Jun 2009                   | <b>Frequency (MHz):</b><br>(F1) 400.137       |
| <b>Document's Title:</b><br>ester-3-Cl-H.mrc  | <b>Original Points Count:</b><br>(F1) 6503    |
| <b>Spectrum Title:</b><br>STANDARD 1H OBSERVE | <b>Actual Points Count:</b><br>(F1) 32768     |
|                                               | <b>Acquisition Time (sec):</b><br>(F1) 1.4981 |
|                                               | <b>Spectral Width (ppm):</b><br>(F1) 15.020   |
|                                               | <b>Pulse Program:</b><br>Unknown              |
|                                               | <b>Temperature:</b><br>18                     |
|                                               | <b>Number of Scans:</b><br>1                  |
|                                               | <b>Acq. Date:</b><br>May 15 2008              |

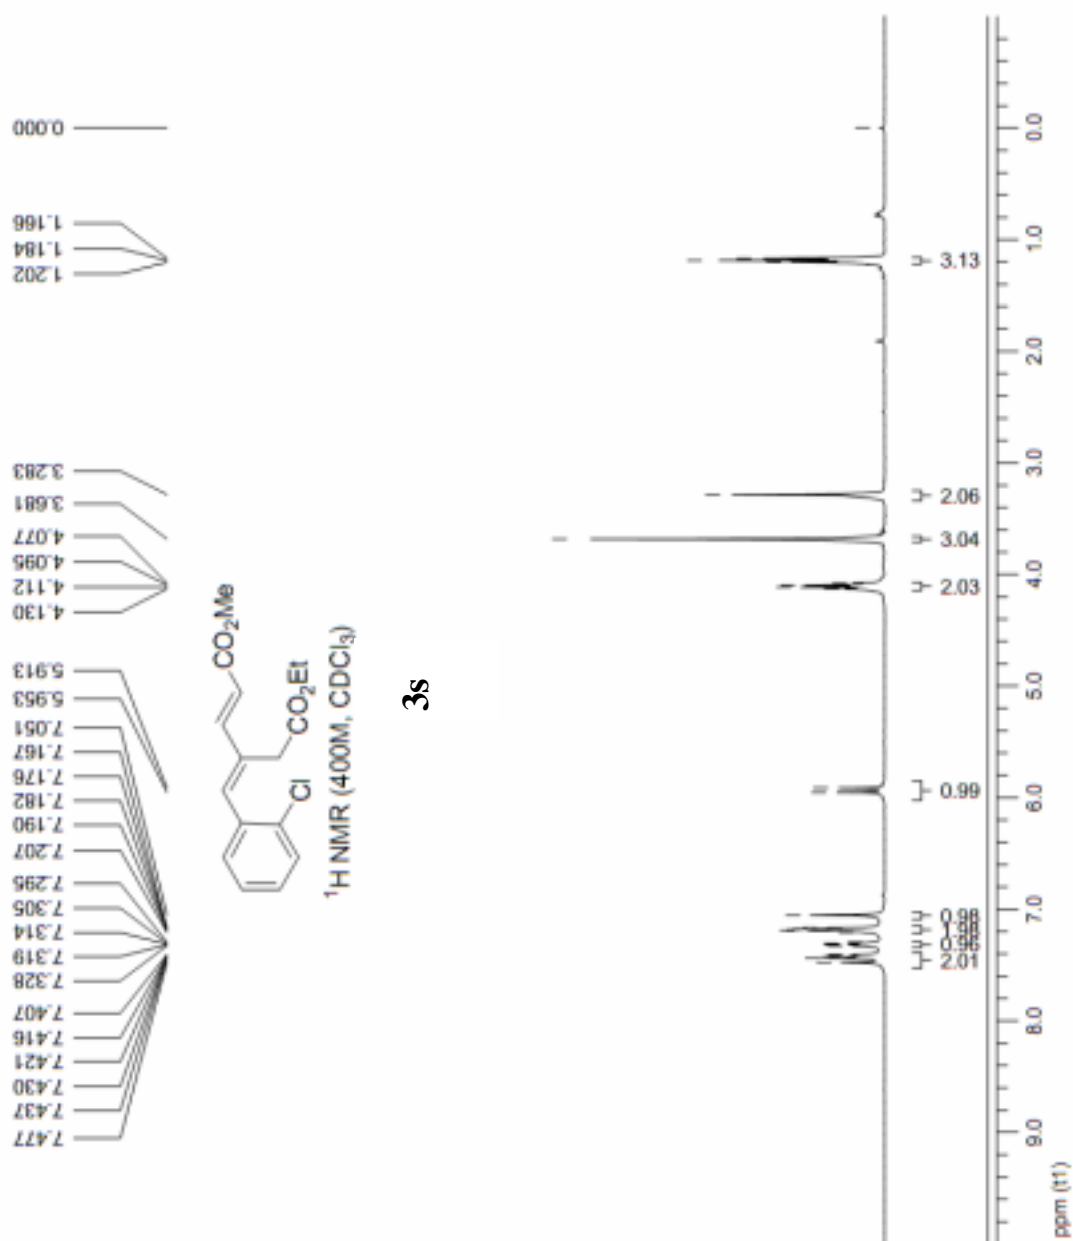

3s

Date: 25 Jun 2009  
 Document's Title: ester-3-Cl-C.mrc  
 Spectrum Title: None  
 Frequency (MHz): (F1) 75.468  
 Original Points Count: (F1) 32768  
 Actual Points Count: (F1) 32768  
 Acquisition Time (sec): (F1) 1.8219  
 Spectral Width (ppm): (F1) 238.322  
 Pulse Program: Unknown

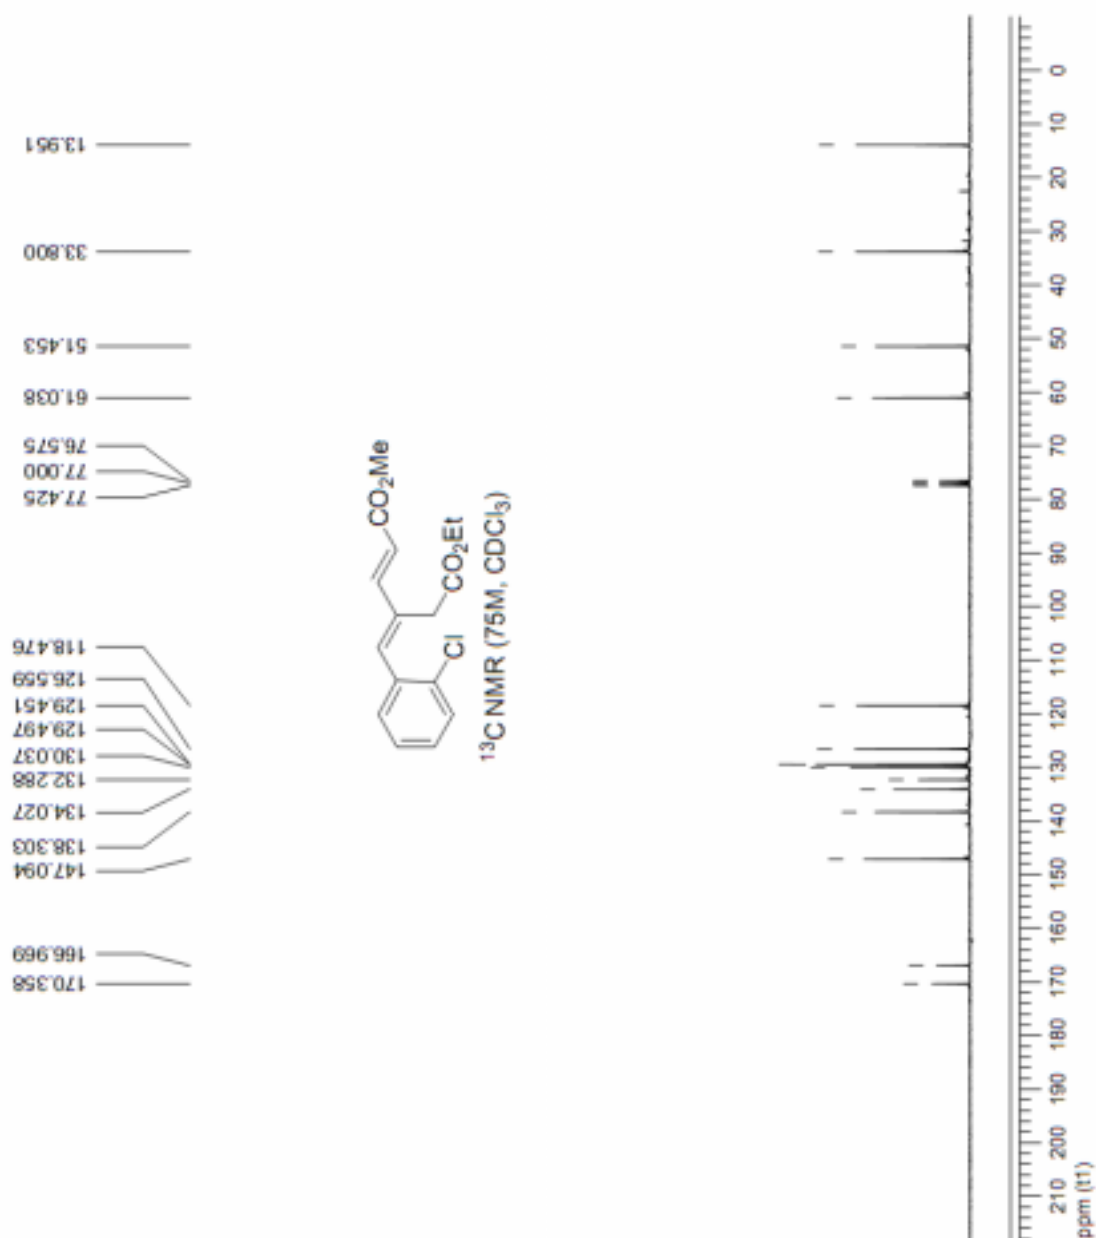

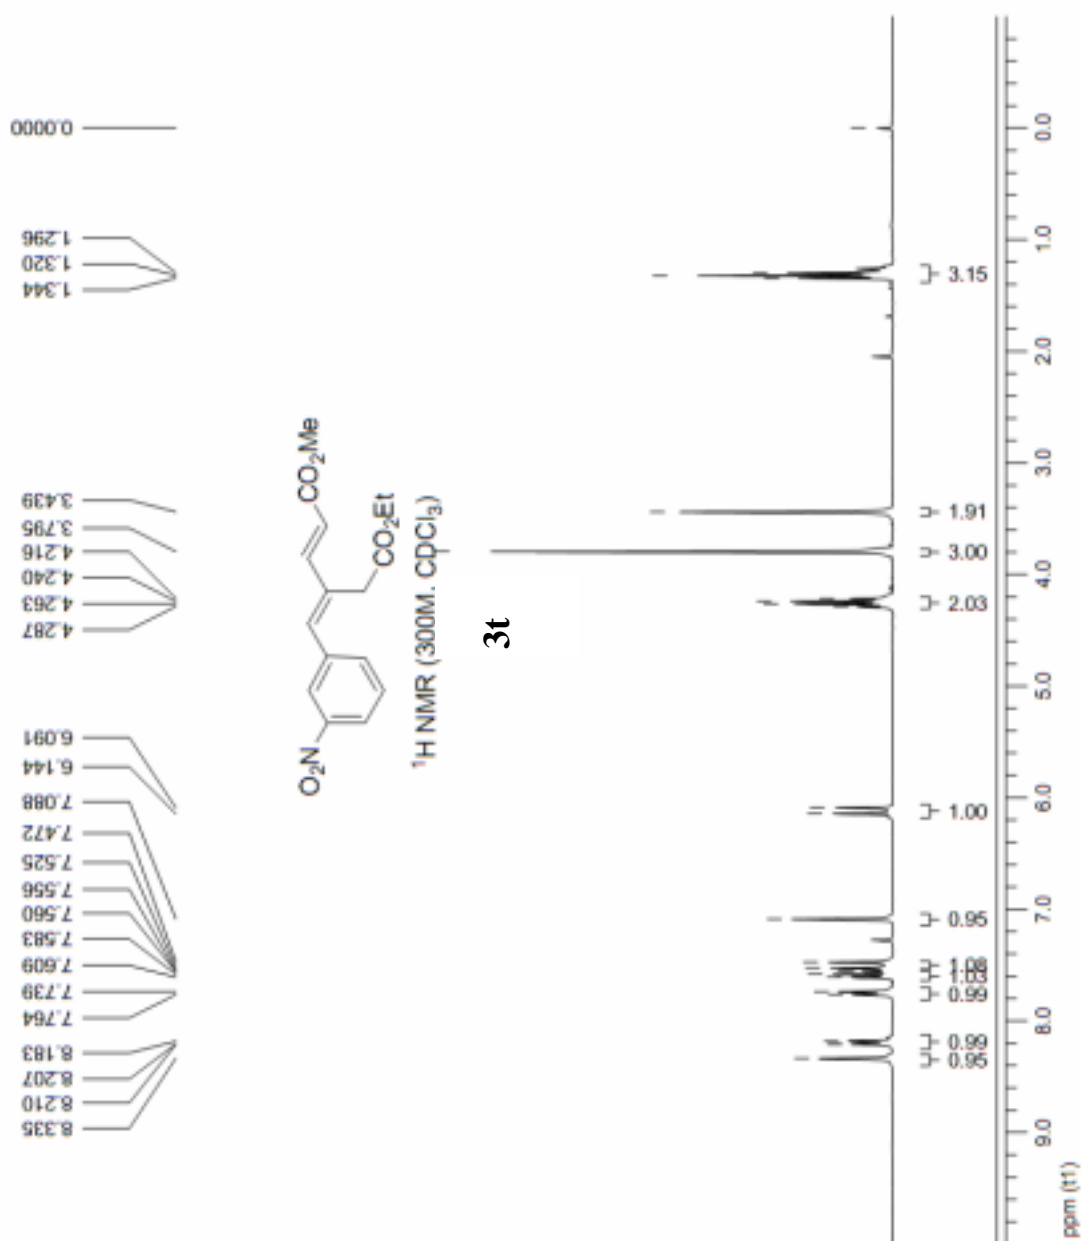

Date: 25 Jun 2009  
 Document's Title: ester-3-NO2-C.mv  
 Spectrum Title: None  
 Frequency (MHz): (f1) 75.468  
 Original Points Count: (f1) 32768  
 Actual Points Count: (f1) 32768  
 Acquisition Time (sec): (f1) 1.8219  
 Spectral Width (ppm): (f1) 238.322  
 Pulse Program: Unknown

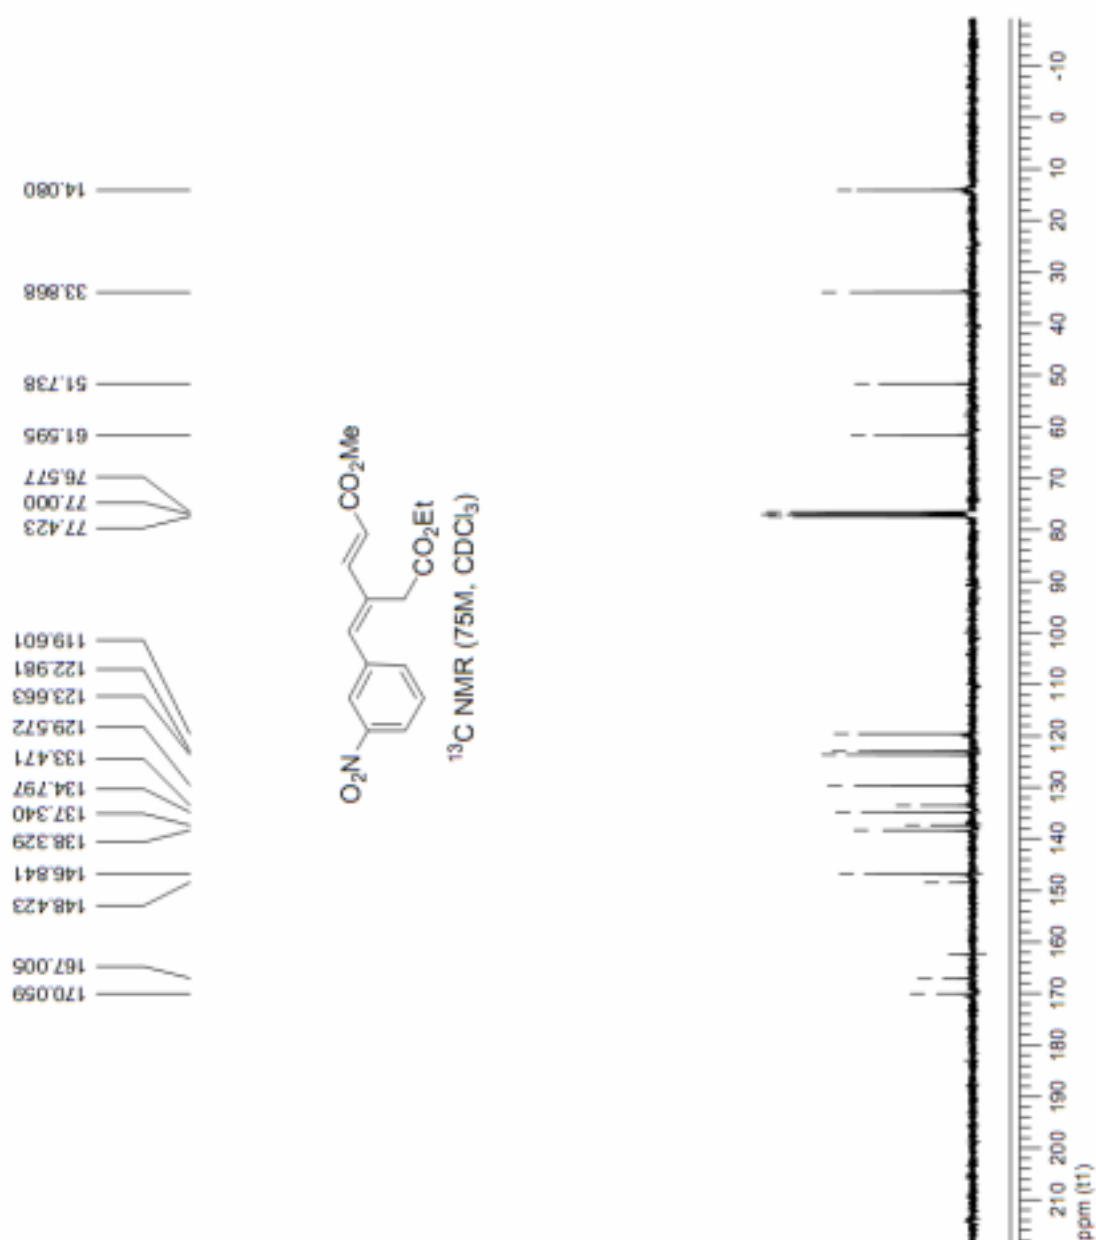

|                         |                                |
|-------------------------|--------------------------------|
| Date:                   | 25 Jun 2009                    |
| Document's Title:       | enter-4-CF <sub>3</sub> -H.mrc |
| Spectrum Title:         | STANDARD 1H OBSERVE            |
| Frequency (MHz):        | (F1) 400.137                   |
| Original Points Count:  | (F1) 6503                      |
| Actual Points Count:    | (F1) 32768                     |
| Acquisition Time (sec): | (F1) 1.4881                    |
| Spectral Width (ppm):   | (F1) 15.020                    |
| Pulse Program:          | Unknown                        |
| Temperature:            | 18                             |
| Number of Scans:        | 1                              |
| Acq. Date:              | Apr 5 2008                     |

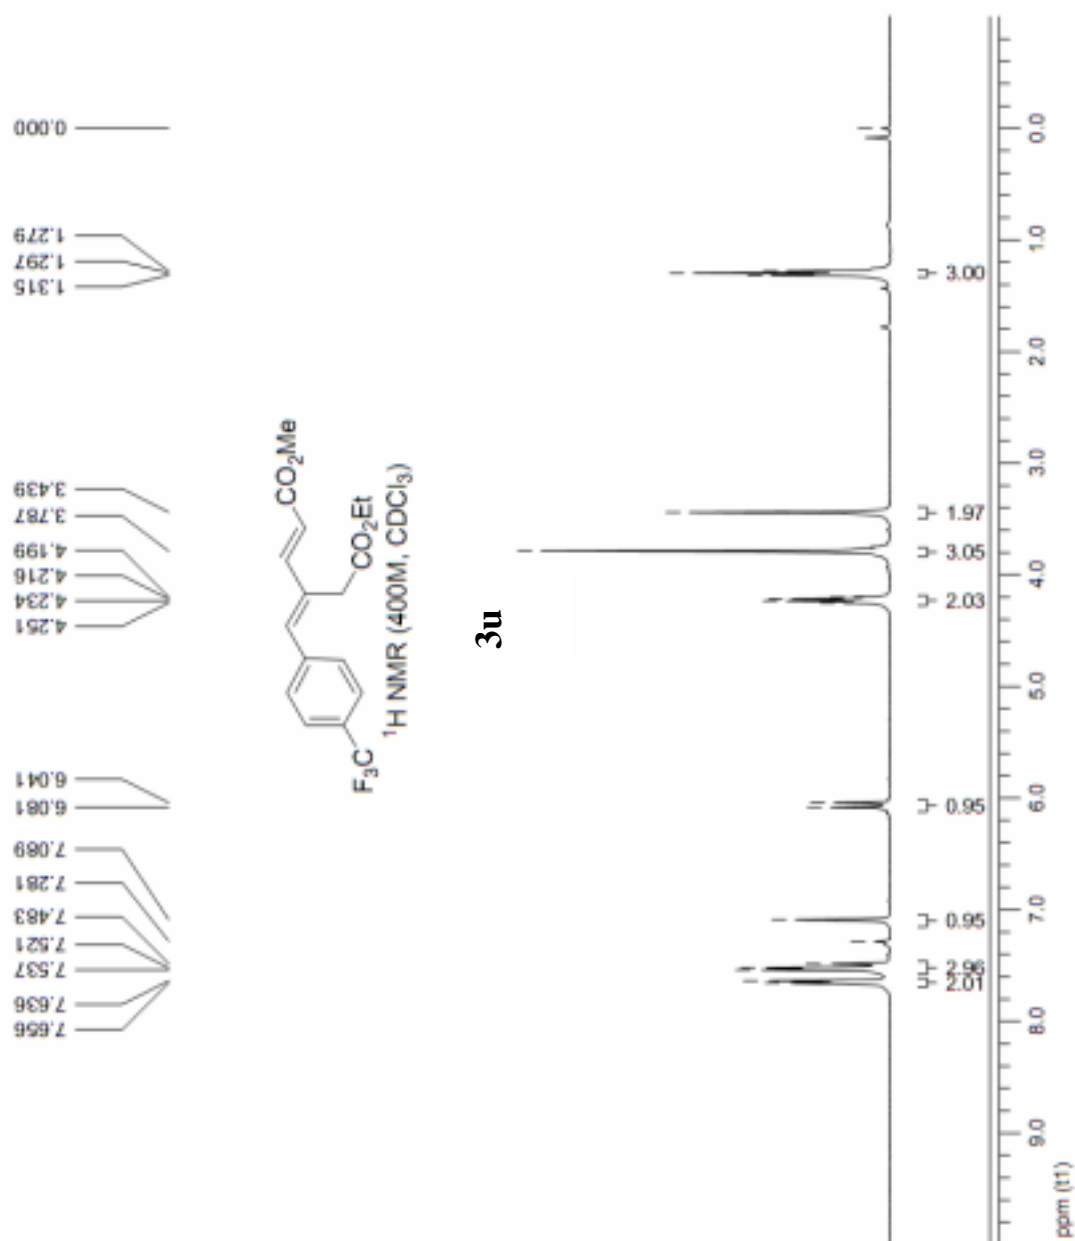

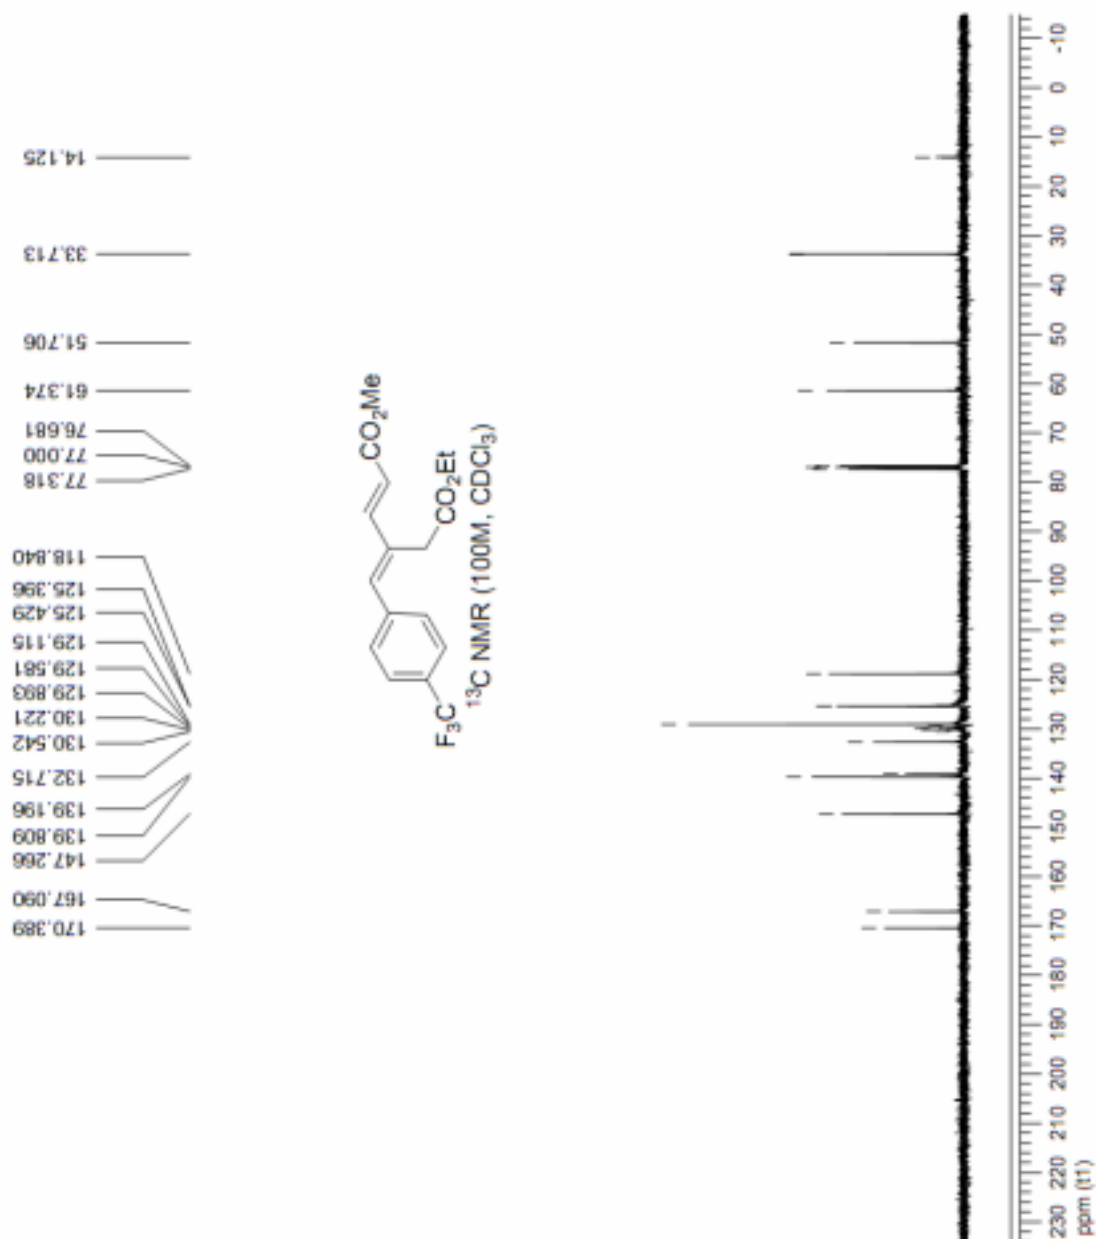

Date: 25 Jun 2009  
 Document's Title: enter-4-CF<sub>3</sub>-C.mmc  
 Spectrum Title: 13C OBSERVE  
 Frequency (MHz): (F1) 100.625  
 Original Points Count: (F1) 7538  
 Actual Points Count: (F1) 16384  
 Acquisition Time (sec): (F1) 0.3008  
 Spectral Width (ppm): (F1) 249.070  
 Pulse Program: Unknown  
 Temperature: 18  
 Number of Scans: 1024  
 Acq. Date: Apr 5 2008

|                                               |                                               |
|-----------------------------------------------|-----------------------------------------------|
| <b>Date:</b><br>25 Jun 2009                   | <b>Frequency (MHz):</b><br>(F1) 400.137       |
| <b>Document's Title:</b><br>ester-Ph-H.mtc    | <b>Original Points Count:</b><br>(F1) 9503    |
| <b>Spectrum Title:</b><br>STANDARD 1H OBSERVE | <b>Actual Points Count:</b><br>(F1) 32768     |
|                                               | <b>Acquisition Time (sec):</b><br>(F1) 1.4981 |
|                                               | <b>Spectral Width (ppm):</b><br>(F1) 15.020   |
|                                               | <b>Pulse Program:</b><br>Unknown              |
|                                               | <b>Temperature:</b><br>18                     |
|                                               | <b>Number of Scans:</b><br>8                  |
| <b>Acq. Date:</b><br>May 12 2008              |                                               |

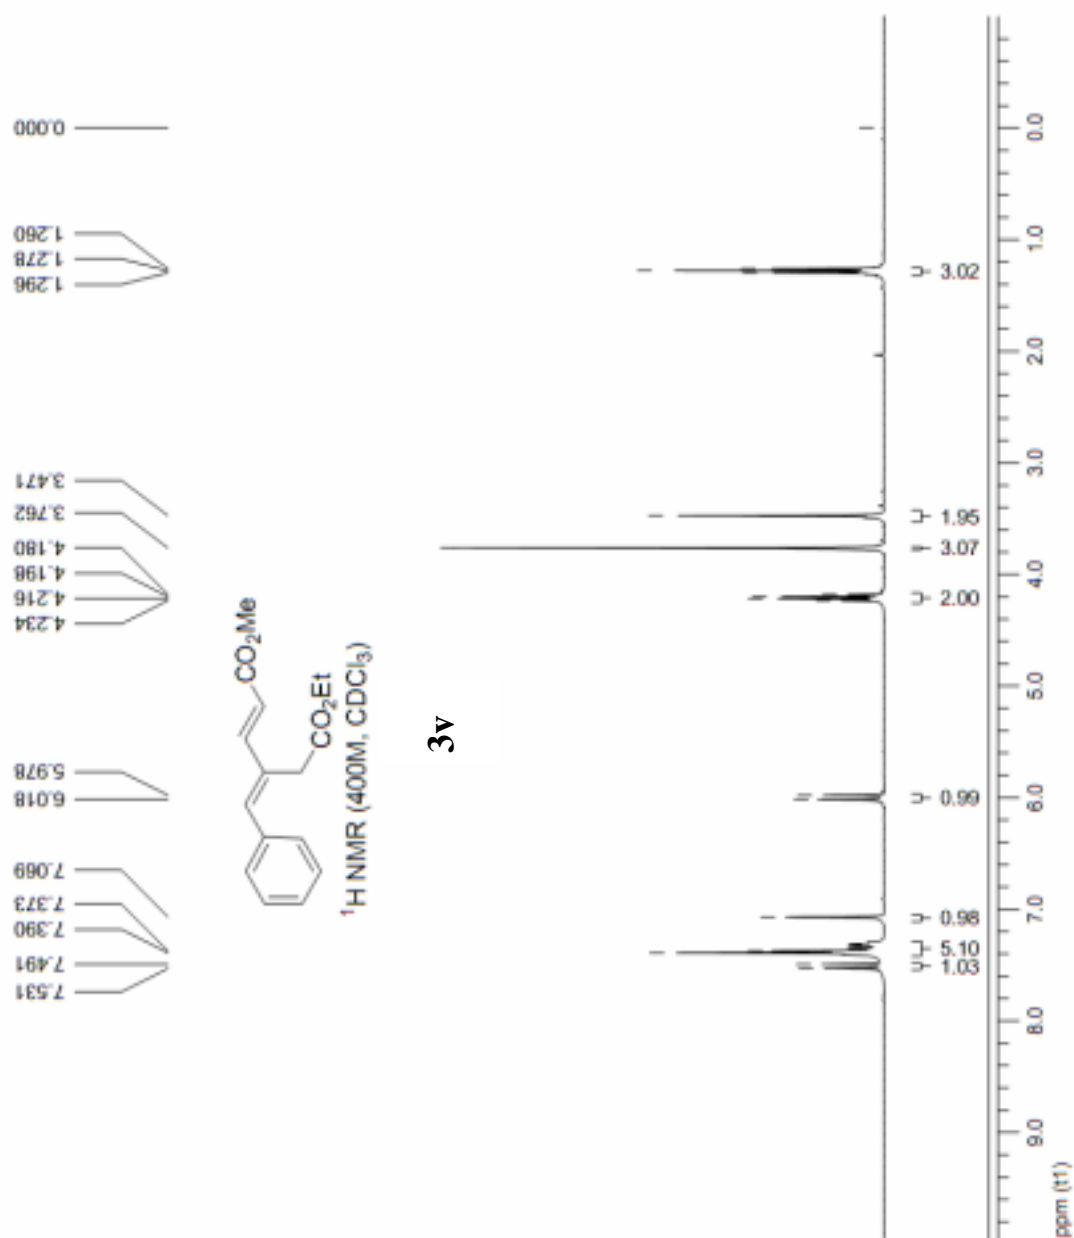

Date: 25 Jun 2009  
 Document's Title: ester-Ph-C.msc  
 Spectrum Title: None  
 Frequency (MHz): (f1) 75.468  
 Original Points Count: (f1) 32768  
 Actual Points Count: (f1) 32768  
 Acquisition Time (sec): (f1) 1.8219  
 Spectral Width (ppm): (f1) 238.322  
 Pulse Program: Unknown

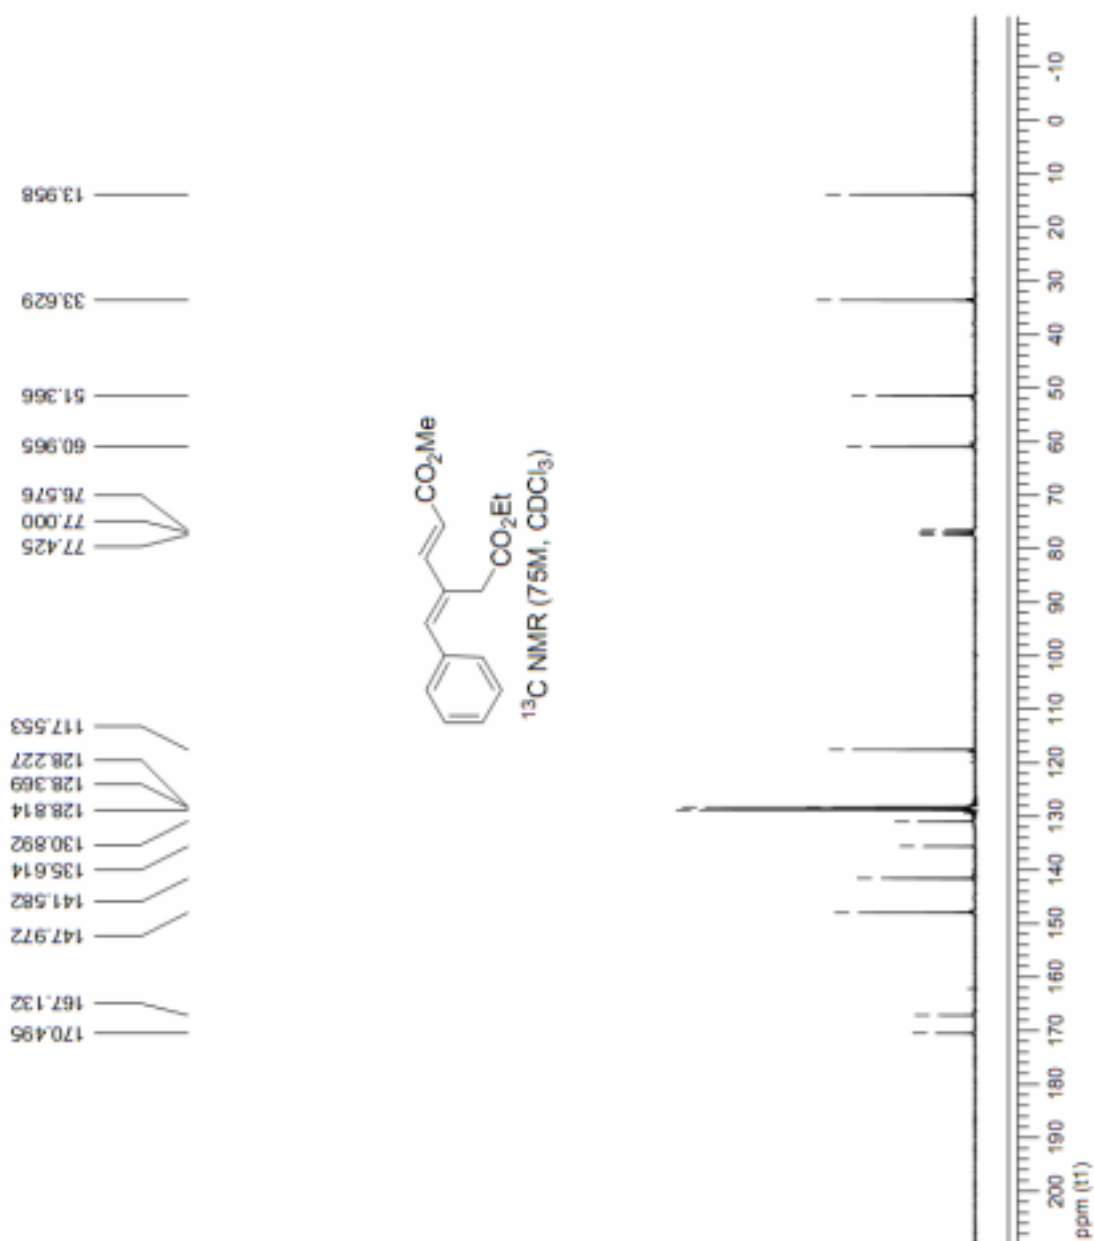

|                         |                     |
|-------------------------|---------------------|
| Date:                   | 25 Jun 2009         |
| Document's Title:       | ester-4-CH3-H.mrc   |
| Spectrum Title:         | STANDARD 1H OBSERVE |
| Frequency (MHz):        | (F1) 400.137        |
| Original Points Count:  | (F1) 6503           |
| Actual Points Count:    | (F1) 32768          |
| Acquisition Time (sec): | (F1) 1.4881         |
| Spectral Width (ppm):   | (F1) 15.020         |
| Pulse Program:          | Unknown             |
| Temperature:            | 18                  |
| Number of Scans:        | 8                   |
| Acq. Date:              | Apr 5 2008          |

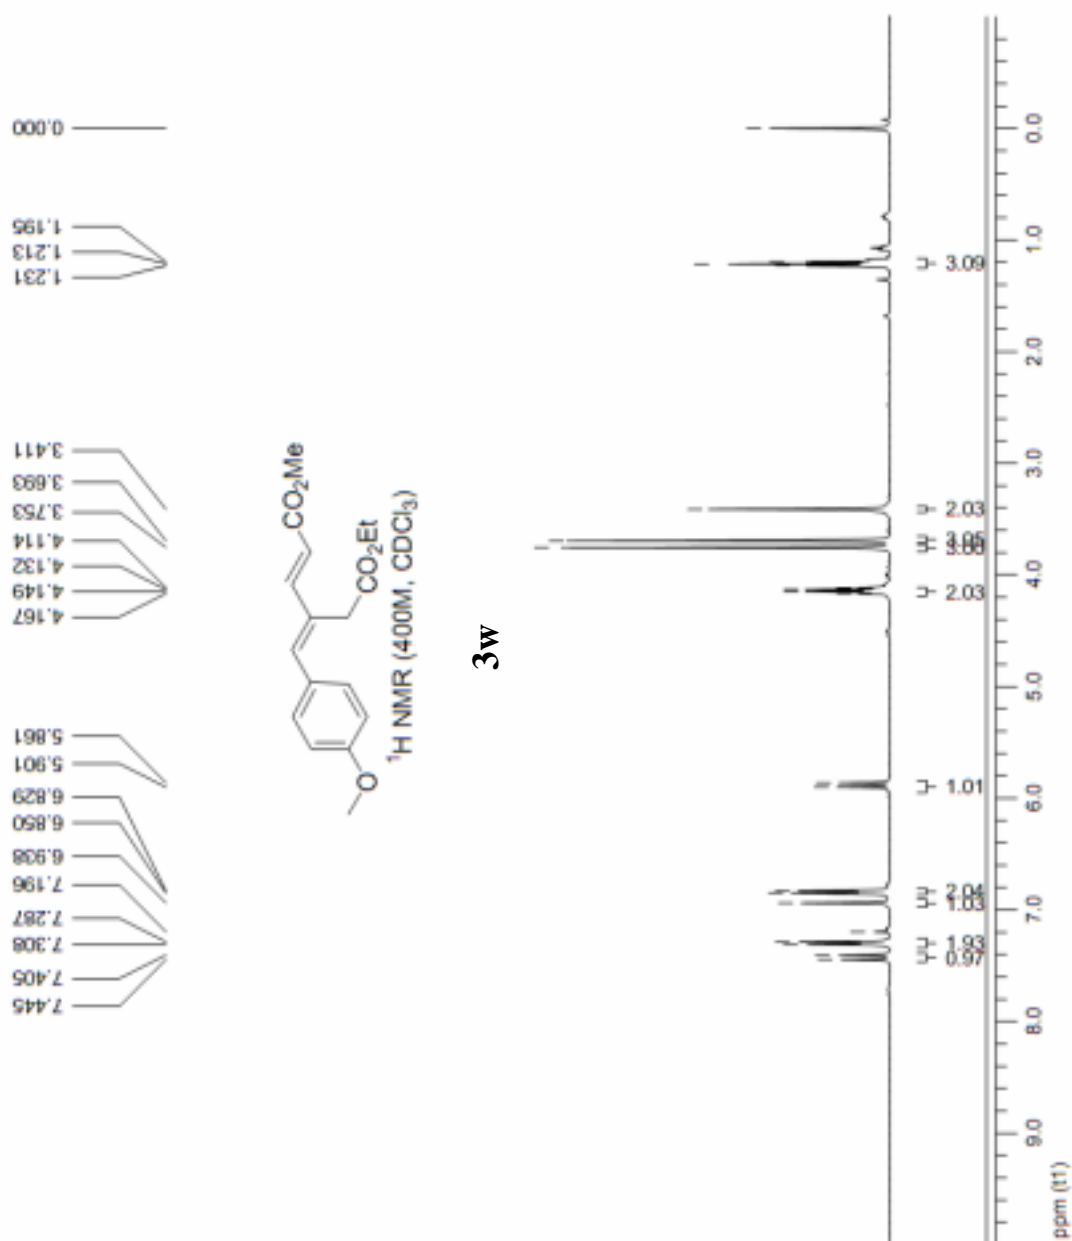

3w

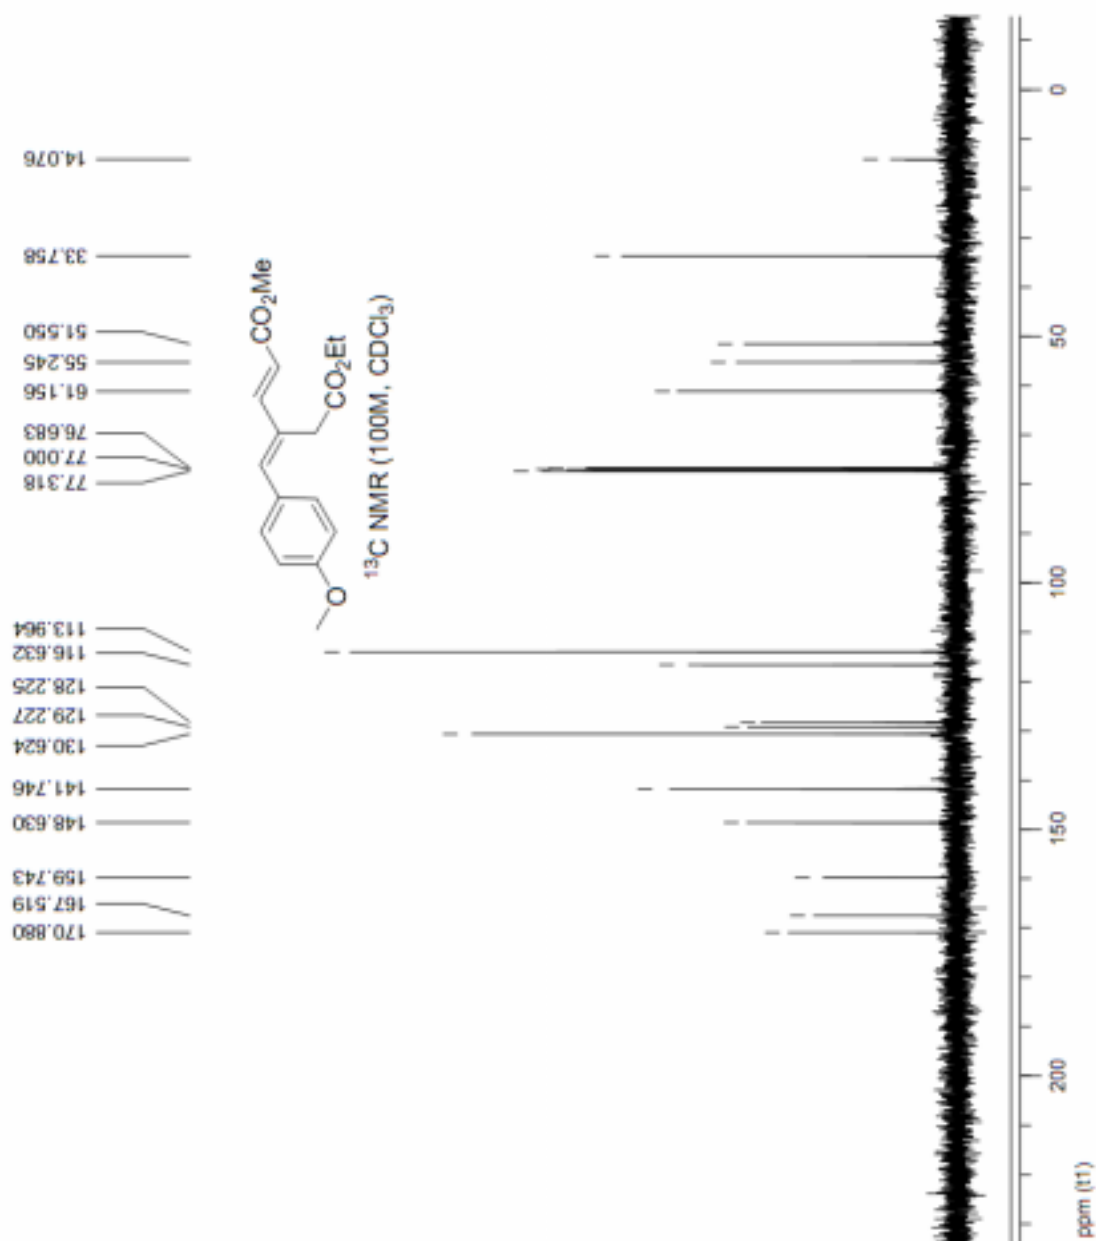

Date: 15 Apr 2009  
 Document's Title: enter-4-CH3-C.mrc  
 Spectrum Title: 13C OBSERVE  
 Frequency (MHz): (F1) 100.625  
 Original Points Count: (F1) 7538  
 Actual Points Count: (F1) 16384  
 Acquisition Time (sec): (F1) 0.3008  
 Spectral Width (ppm): (F1) 249.070  
 Pulse Program: Unknown  
 Temperature: 18  
 Number of Scans: 1024  
 Acq. Date: Apr 5 2008

|                         |                     |
|-------------------------|---------------------|
| Date:                   | 25 Jun 2009         |
| Document's Title:       | ester-2-OH-1H.mrc   |
| Spectrum Title:         | STANDARD 1H OBSERVE |
| Frequency (MHz):        | (F1) 400.137        |
| Original Points Count:  | (F1) 9603           |
| Actual Points Count:    | (F1) 32768          |
| Acquisition Time (sec): | (F1) 1.4981         |
| Spectral Width (ppm):   | (F1) 16.020         |
| Pulse Program:          | Unknown             |
| Temperature:            | 18                  |
| Number of Scans:        | 1                   |
| Acq. Date:              | Jul 3 2008          |

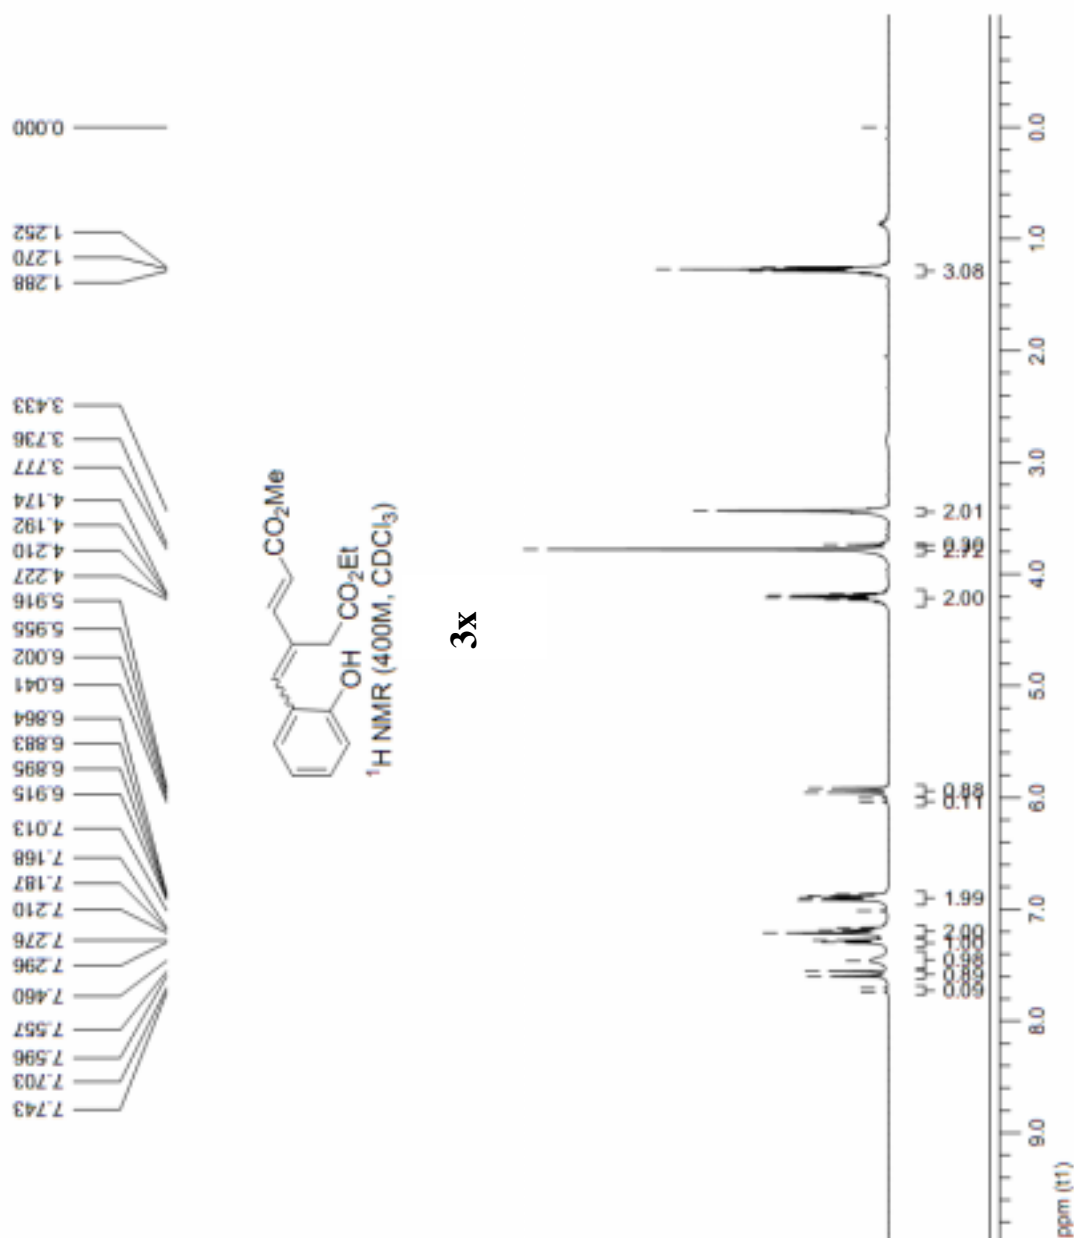

Date: 25 Jun 2009  
 Document's Title: enter-3-OH-C.mrc  
 Spectrum Title: None  
 Frequency (MHz): (f1) 75.468  
 Original Points Count: (f1) 32768  
 Actual Points Count: (f1) 32768  
 Acquisition Time (sec): (f1) 1.8219  
 Spectral Width (ppm): (f1) 230.322  
 Pulse Program: Unknown

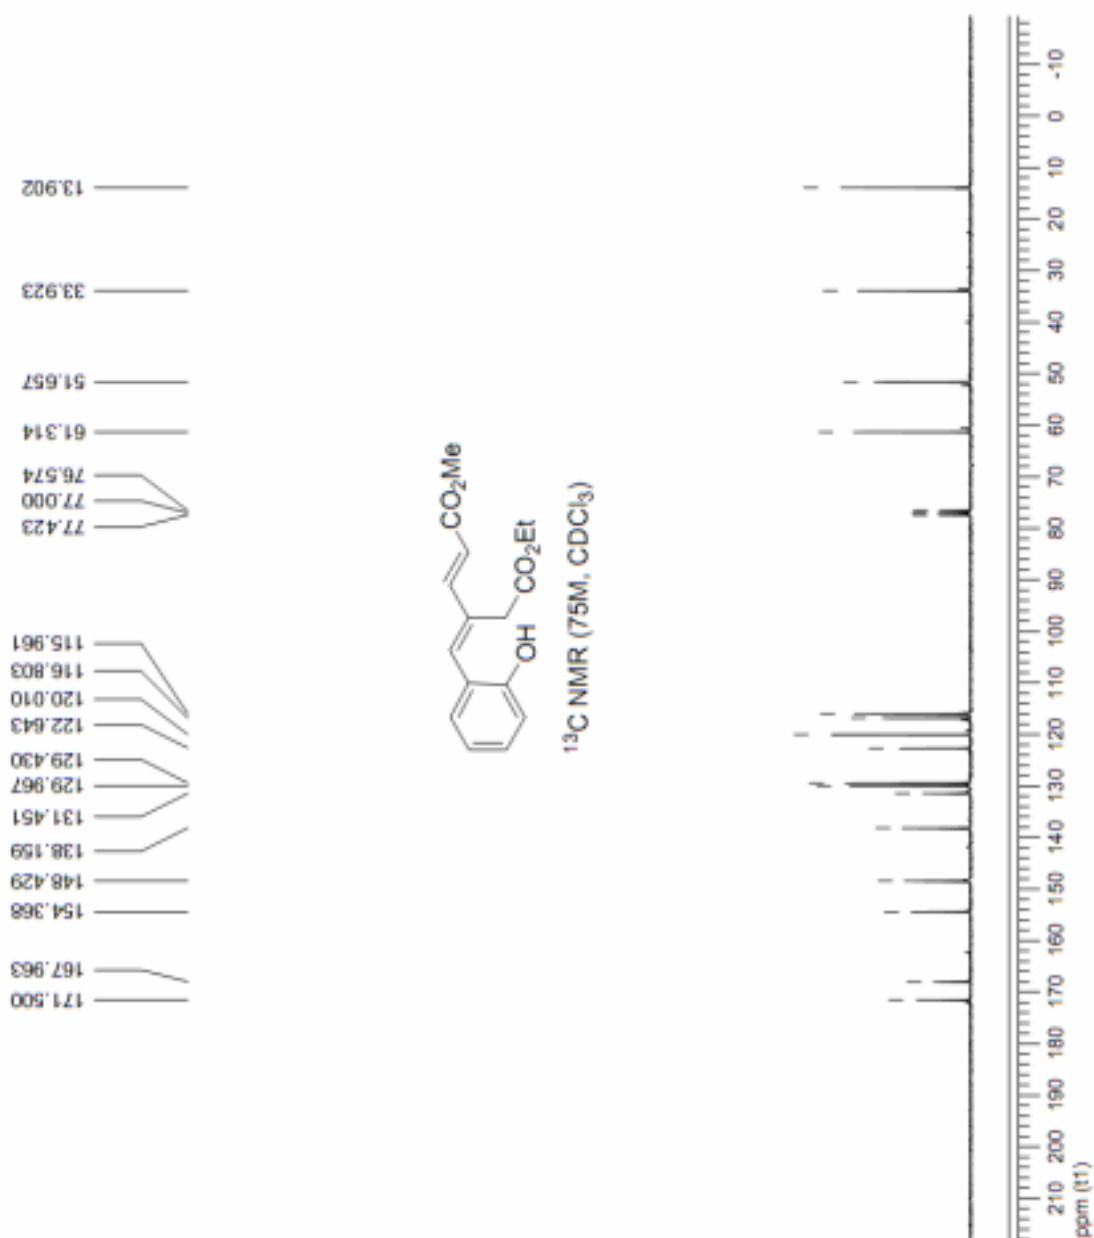

## NOSEY Spectra of 3d and 3t

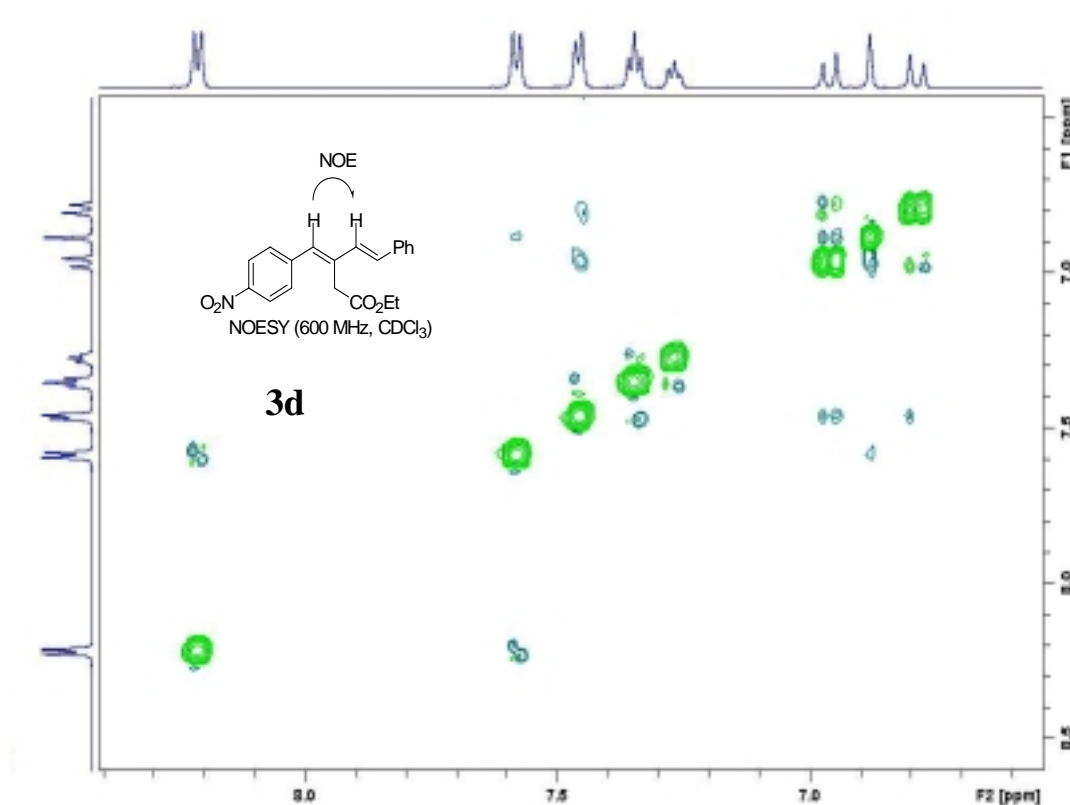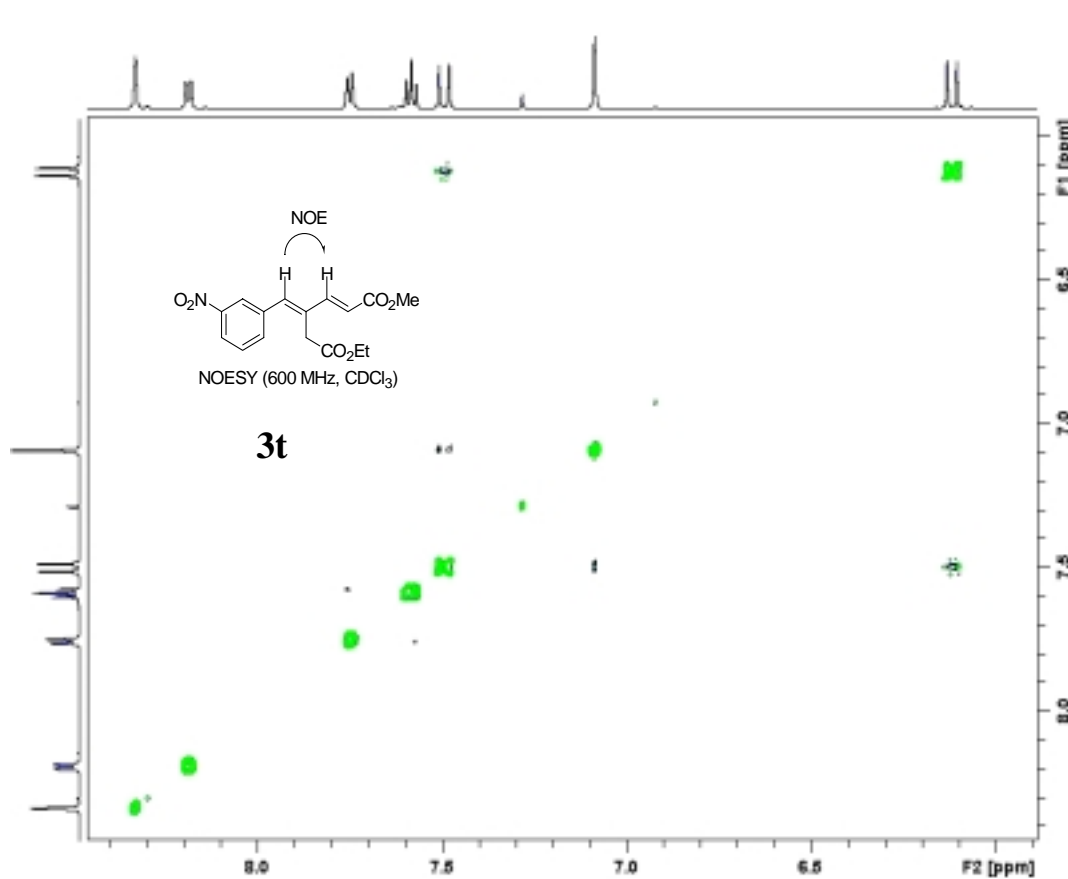

## ORTEP Representation of 3c and 3t

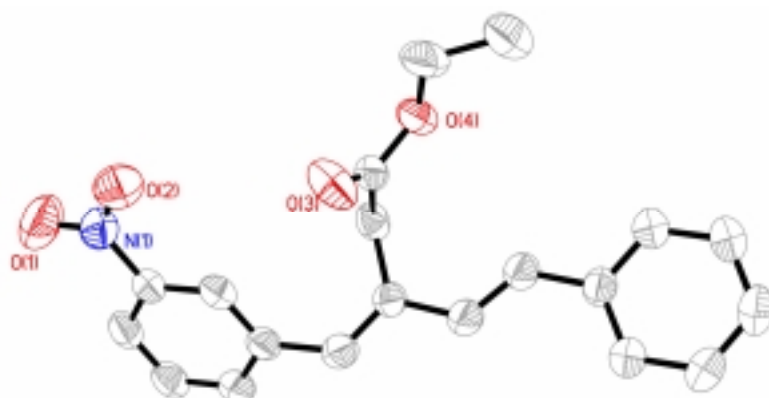

**Table 1. Crystal Data and Structure Refinement for 3c**

|                                   |                                                                                         |
|-----------------------------------|-----------------------------------------------------------------------------------------|
| Identification code               | <b>3c</b>                                                                               |
| Empirical formula                 | C <sub>20</sub> H <sub>19</sub> NO <sub>4</sub>                                         |
| Formula weight                    | 337.36                                                                                  |
| Temperature                       | 294(2) K                                                                                |
| Wavelength                        | 0.71073 Å                                                                               |
| Crystal system                    | Monoclinic                                                                              |
| Space group                       | P2(1)/c                                                                                 |
| Unit cell dimensions              | a = 6.854(2) Å alpha = 90°<br>b = 7.879(2) Å beta = 90°<br>c = 32.765(10) Å gamma = 90° |
| Volume                            | 1769.4(10) Å <sup>3</sup>                                                               |
| Z                                 | 4                                                                                       |
| Calculated density                | 1.266 Mg/m <sup>3</sup>                                                                 |
| Absorption coefficient            | 0.088 mm <sup>-1</sup>                                                                  |
| F(000)                            | 712                                                                                     |
| Crystal size                      | 0.26 x 0.22 x 0.20 mm <sup>3</sup>                                                      |
| Theta range for data collection   | 1.24 to 26.42°                                                                          |
| Limiting indices                  | -8 ≤ h ≤ 8, -9 ≤ k ≤ 7, -40 ≤ l ≤ 40                                                    |
| Reflections collected             | 9978                                                                                    |
| Independent reflections           | 3639 [R(int) = 0.0449]                                                                  |
| Completeness to theta = 26.42°    | 99.7 %                                                                                  |
| Absorption correction             | Semi-empirical from equivalents                                                         |
| Max. and min. transmission        | 0.9825 and 0.9774                                                                       |
| Refinement method                 | Full-matrix least-squares on F <sup>2</sup>                                             |
| Data / restraints / parameters    | 3639 / 0 / 227                                                                          |
| Goodness-of-fit on F <sup>2</sup> | 0.998                                                                                   |
| Final R indices [I > 2sigma(I)]   | R1 = 0.0474, wR2 = 0.1033                                                               |
| R indices (all data)              | R1 = 0.1189, wR2 = 0.1288                                                               |
| Largest diff. peak and hole       | 0.137 and -0.177 e. Å <sup>-3</sup>                                                     |

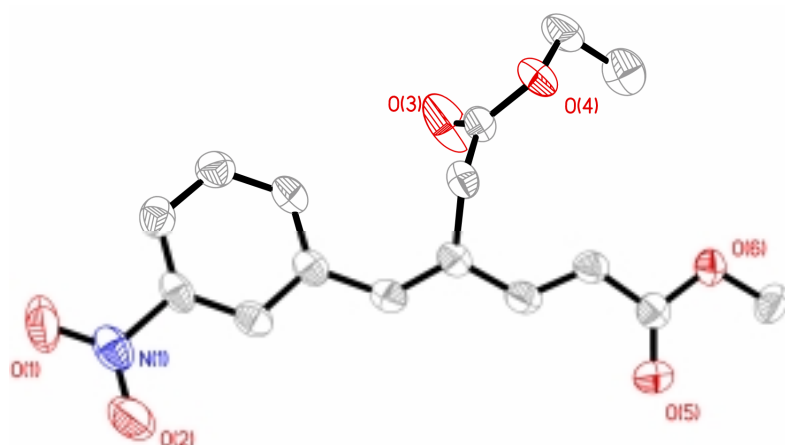

**Table 2. Crystal Data and Structure Refinement for 3t**

|                                   |                                                                                                              |
|-----------------------------------|--------------------------------------------------------------------------------------------------------------|
| Identification code               | <b>3t</b>                                                                                                    |
| Empirical formula                 | C <sub>16</sub> H <sub>17</sub> NO <sub>6</sub>                                                              |
| Formula weight                    | 319.31                                                                                                       |
| Temperature                       | 113(2) K                                                                                                     |
| Wavelength                        | 0.71073 Å                                                                                                    |
| Crystal system                    | Triclinic                                                                                                    |
| Space group                       | P-1                                                                                                          |
| Unit cell dimensions              | a = 8.2434(16) Å alpha = 82.63(3)°<br>b = 9.3954(19) Å beta = 84.66(3)°<br>c = 10.116(2) Å gamma = 80.19(3)° |
| Volume                            | 763.6(3) Å <sup>3</sup>                                                                                      |
| Z                                 | 2                                                                                                            |
| Calculated density                | 1.389 Mg/m <sup>3</sup>                                                                                      |
| Absorption coefficient            | 0.107 mm <sup>-1</sup>                                                                                       |
| F(000)                            | 336                                                                                                          |
| Crystal size                      | 0.16 x 0.12 x 0.08 mm <sup>3</sup>                                                                           |
| Theta range for data collection   | 2.04 to 25.01°                                                                                               |
| Limiting indices                  | -9 ≤ h ≤ 7, -11 ≤ k ≤ 11, -12 ≤ l ≤ 11                                                                       |
| Reflections collected             | 5656                                                                                                         |
| Independent reflections           | 2666 [R(int) = 0.0248]                                                                                       |
| Completeness to theta = 25.01°    | 99.3 %                                                                                                       |
| Absorption correction             | Semi-empirical from equivalents                                                                              |
| Max. and min. transmission        | 0.9915 and 0.9831                                                                                            |
| Refinement method                 | Full-matrix least-squares on F <sup>2</sup>                                                                  |
| Data / restraints / parameters    | 2666 / 0 / 210                                                                                               |
| Goodness-of-fit on F <sup>2</sup> | 1.072                                                                                                        |
| Final R indices [I > 2sigma(I)]   | R1 = 0.0327, wR2 = 0.0915                                                                                    |
| R indices (all data)              | R1 = 0.0424, wR2 = 0.0962                                                                                    |
| Largest diff. peak and hole       | 0.169 and -0.228 e. Å <sup>-3</sup>                                                                          |
